# Supplementary material
Source: MDPI journal article supplement (https://www.mdpi.com/2312-7481/7/11/148)
Supplement: s1 [file s1]

**Predicting Pt-195 NMR Chemical Shift and  $^1J(^{195}\text{Pt}-^{31}\text{P})$  Coupling Constant for Pt(0)  
Complexes using the NMR-DKH Basis Sets**

Joyce H. C. e Silva<sup>1</sup>, H lio F. Dos Santos<sup>2</sup>, Diego F. S. Paschoal<sup>1\*</sup>

<sup>1</sup>NQTCM: N cleo de Qu mica Te rica e Computacional de Maca , Polo Ajuda, Instituto Multidisciplinar de Qu mica, Centro Multidisciplinar UFRJ-Maca , Universidade Federal do Rio de Janeiro, 27.973-545, Maca , RJ, Brazil.

<sup>2</sup>NEQC: N cleo de Estudos em Qu mica Computacional, Departamento de Qu mica - ICE, Universidade Federal de Juiz de Fora, Campus Universit rio, 36.036-900, Juiz de Fora, MG, Brazil.

\*Corresponding author:

Diego F. S. Paschoal, e-mail: [diegopaschoal01@gmail.com](mailto:diegopaschoal01@gmail.com) or [diegofspaschoal@macae.ufrj.br](mailto:diegofspaschoal@macae.ufrj.br)

**SUPPLEMENTARY MATERIAL**

**Optimized structure of Pt(0) complexes studied in the present paper - XYZ format**

---

.

**Complex 01 - [Pt(PPR<sup>i</sup><sub>3</sub>)<sub>2</sub>]**

|    |           |           |           |
|----|-----------|-----------|-----------|
| Pt | -0.012491 | 0.063402  | 0.010625  |
| P  | -2.318739 | 0.015232  | -0.018680 |
| P  | 2.292419  | 0.109391  | -0.001215 |
| C  | -3.020062 | -1.209414 | -1.267550 |
| H  | -4.116683 | -1.214501 | -1.152019 |
| C  | -2.491604 | -2.623830 | -0.987059 |
| H  | -1.394007 | -2.652129 | -1.074666 |
| H  | -2.752219 | -2.980674 | 0.020232  |
| H  | -2.917319 | -3.338174 | -1.712316 |
| C  | -2.682003 | -0.783479 | -2.703659 |
| H  | -3.161997 | 0.165136  | -2.987893 |
| H  | -1.593269 | -0.664746 | -2.830967 |
| H  | -3.027283 | -1.552501 | -3.415635 |
| C  | -3.070096 | 1.672723  | -0.527092 |
| H  | -2.621741 | 1.821506  | -1.523803 |
| C  | -4.596070 | 1.734787  | -0.670398 |
| H  | -4.890455 | 2.702666  | -1.110384 |
| H  | -5.000149 | 0.944509  | -1.321501 |
| H  | -5.099815 | 1.660963  | 0.306130  |
| C  | -2.548827 | 2.802672  | 0.372504  |
| H  | -2.953952 | 2.731988  | 1.395739  |
| H  | -1.451114 | 2.783009  | 0.440822  |
| H  | -2.857060 | 3.781614  | -0.031415 |
| C  | -3.162135 | -0.390292 | 1.633696  |
| H  | -3.283004 | 0.610696  | 2.082943  |
| C  | -4.551288 | -1.040183 | 1.549037  |
| H  | -4.994264 | -1.099353 | 2.556374  |
| H  | -5.249940 | -0.479518 | 0.914652  |
| H  | -4.497354 | -2.069063 | 1.162511  |
| C  | -2.232851 | -1.190119 | 2.559440  |
| H  | -1.253577 | -0.700147 | 2.661606  |
| H  | -2.687327 | -1.289876 | 3.560107  |
| H  | -2.050920 | -2.205957 | 2.173526  |
| C  | 3.026779  | 1.843057  | -0.084017 |
| H  | 4.124926  | 1.738045  | -0.059200 |
| C  | 2.587662  | 2.675778  | 1.129143  |
| H  | 1.489952  | 2.767354  | 1.160509  |
| H  | 2.915661  | 2.240298  | 2.085043  |
| H  | 3.015629  | 3.690302  | 1.065394  |
| C  | 2.633782  | 2.546784  | -1.391352 |
| H  | 3.059995  | 2.057986  | -2.280535 |
| H  | 1.537822  | 2.568100  | -1.508854 |
| H  | 2.998919  | 3.587458  | -1.384504 |
| C  | 3.030544  | -0.608838 | 1.586732  |
| H  | 2.471261  | -0.030130 | 2.341586  |
| C  | 4.527565  | -0.392883 | 1.848135  |
| H  | 4.825528  | 0.663379  | 1.783444  |
| H  | 4.776858  | -0.737236 | 2.866031  |
| H  | 5.157947  | -0.963775 | 1.151608  |
| C  | 2.634444  | -2.079767 | 1.776269  |
| H  | 1.560665  | -2.232951 | 1.586603  |
| H  | 3.200941  | -2.744827 | 1.105756  |
| H  | 2.852044  | -2.398179 | 2.809756  |
| C  | 3.042802  | -0.739637 | -1.514108 |
| H  | 2.665608  | -0.076461 | -2.309453 |
| C  | 4.574104  | -0.774654 | -1.616966 |
| H  | 5.013137  | -1.509048 | -0.925836 |
| H  | 4.873162  | -1.073024 | -2.636077 |
| H  | 5.040111  | 0.201489  | -1.413001 |
| C  | 2.431831  | -2.122915 | -1.778753 |
| H  | 1.330652  | -2.087172 | -1.719745 |
| H  | 2.717854  | -2.473493 | -2.785085 |
| H  | 2.786388  | -2.876979 | -1.061837 |

**Complex 2 - [Pt(Pcy<sub>3</sub>)<sub>2</sub>], cy = cyclohexil**

|    |           |           |           |
|----|-----------|-----------|-----------|
| Pt | 0.000108  | 0.028008  | -0.008690 |
| P  | -2.303969 | 0.015533  | 0.012426  |
| P  | 2.302480  | -0.003801 | -0.014265 |
| C  | -3.245535 | 4.265844  | 2.026749  |
| H  | -3.790697 | 5.049828  | 2.579652  |
| H  | -2.265912 | 4.699555  | 1.753558  |
| C  | -3.020209 | 3.036584  | 2.912013  |
| H  | -3.993613 | 2.682233  | 3.300124  |
| H  | -2.414246 | 3.303383  | 3.794628  |
| C  | -2.334908 | 1.900371  | 2.138866  |
| H  | -1.326119 | 2.218010  | 1.822864  |
| H  | -2.180333 | 1.038526  | 2.801315  |
| C  | -4.002639 | 3.888562  | 0.749625  |
| H  | -4.103519 | 4.765693  | 0.087828  |
| H  | -5.031136 | 3.579292  | 1.013819  |
| C  | -3.315130 | 2.744676  | -0.013896 |
| H  | -3.910109 | 2.507679  | -0.907816 |
| H  | -2.327798 | 3.090109  | -0.368790 |
| C  | -3.124490 | 1.497670  | 0.873996  |
| H  | -4.131804 | 1.150038  | 1.172550  |
| C  | -3.149052 | -3.887228 | 2.668467  |
| H  | -2.157616 | -3.868866 | 3.157291  |
| H  | -3.679028 | -4.767448 | 3.070741  |
| C  | -2.958398 | -4.016065 | 1.154059  |
| H  | -3.942708 | -4.172082 | 0.673771  |
| H  | -2.353213 | -4.907064 | 0.915433  |
| C  | -3.905876 | -2.601569 | 3.017617  |
| H  | -3.980774 | -2.483915 | 4.112288  |
| H  | -4.943651 | -2.677402 | 2.642713  |
| C  | -3.243792 | -1.353573 | 2.409668  |
| H  | -3.842479 | -0.469614 | 2.674297  |
| H  | -2.246414 | -1.214744 | 2.863358  |
| C  | -3.088922 | -1.479921 | 0.880881  |
| H  | -4.106592 | -1.571588 | 0.456866  |
| C  | -2.294402 | -2.765606 | 0.561712  |
| H  | -1.277733 | -2.647852 | 0.976195  |
| H  | -2.158048 | -2.890184 | -0.521090 |
| C  | -3.411124 | -1.378690 | -2.316459 |
| H  | -4.009869 | -2.011843 | -1.644772 |
| H  | -2.449712 | -1.898422 | -2.475228 |
| C  | -3.150298 | 0.007372  | -1.691982 |
| H  | -4.139775 | 0.475106  | -1.528992 |
| C  | -4.140666 | -1.256814 | -3.664675 |
| H  | -5.143715 | -0.822886 | -3.493800 |
| H  | -4.306206 | -2.262046 | -4.088955 |
| C  | -3.370864 | -0.378346 | -4.656321 |
| H  | -3.940368 | -0.268383 | -5.595208 |
| H  | -2.421881 | -0.879590 | -4.922947 |
| C  | -3.060640 | 0.994193  | -4.048822 |
| H  | -4.003877 | 1.557601  | -3.917564 |
| H  | -2.439509 | 1.588736  | -4.740643 |
| C  | -2.349729 | 0.869146  | -2.692972 |
| H  | -1.358440 | 0.400467  | -2.826490 |
| H  | -2.148862 | 1.869008  | -2.282324 |
| C  | 2.957376  | -1.616158 | 3.859771  |
| H  | 2.326462  | -2.319988 | 4.429319  |
| H  | 3.914832  | -2.138601 | 3.674470  |
| C  | 3.222525  | -0.350560 | 4.681730  |
| H  | 3.759429  | -0.597461 | 5.613531  |
| H  | 2.256358  | 0.093202  | 4.985571  |
| C  | 4.012842  | 0.677081  | 3.864976  |
| H  | 5.029303  | 0.285529  | 3.672316  |
| H  | 4.144239  | 1.609093  | 4.441207  |
| C  | 3.334881  | 0.994682  | 2.522022  |
| H  | 2.360538  | 1.478030  | 2.713160  |
| H  | 3.952074  | 1.723309  | 1.975788  |
| C  | 3.108524  | -0.280331 | 1.684344  |
| H  | 4.104629  | -0.712820 | 1.472538  |
| C  | 2.286540  | -1.288903 | 2.517935  |
| H  | 2.104581  | -2.216113 | 1.957188  |
| H  | 1.289072  | -0.848547 | 2.692832  |
| C  | 3.094798  | -1.361072 | -1.082867 |
| H  | 4.113057  | -0.997321 | -1.318792 |

|   |          |           |           |
|---|----------|-----------|-----------|
| C | 2.311585 | -1.545384 | -2.401084 |
| H | 2.179470 | -0.587695 | -2.922550 |
| H | 1.292340 | -1.885868 | -2.145580 |
| C | 2.987388 | -2.558494 | -3.336809 |
| H | 3.971881 | -2.164624 | -3.653656 |
| H | 2.388927 | -2.671872 | -4.257349 |
| C | 3.182998 | -3.915578 | -2.653129 |
| H | 3.723997 | -4.611665 | -3.316839 |
| H | 2.193123 | -4.369880 | -2.462438 |
| C | 3.928537 | -3.756702 | -1.324252 |
| H | 4.966891 | -3.430785 | -1.524374 |
| H | 4.004314 | -4.728849 | -0.806961 |
| C | 3.250592 | -2.734155 | -0.397463 |
| H | 2.252601 | -3.111934 | -0.111785 |
| H | 3.838992 | -2.652464 | 0.528508  |
| C | 3.159078 | 1.576061  | -0.634740 |
| H | 4.162591 | 1.570466  | -0.169203 |
| C | 3.369231 | 1.658695  | -2.160271 |
| H | 2.388684 | 1.622998  | -2.666600 |
| H | 3.948802 | 0.798540  | -2.525630 |
| C | 4.093563 | 2.952582  | -2.564742 |
| H | 4.212134 | 2.982190  | -3.661357 |
| H | 5.115537 | 2.941876  | -2.142356 |
| C | 3.356915 | 4.201185  | -2.071730 |
| H | 2.384400 | 4.276867  | -2.591973 |
| H | 3.922894 | 5.111370  | -2.333851 |
| C | 3.113515 | 4.130450  | -0.560936 |
| H | 2.523050 | 4.999406  | -0.224508 |
| H | 4.083092 | 4.192063  | -0.032106 |
| C | 2.396628 | 2.832796  | -0.160755 |
| H | 2.239157 | 2.814474  | 0.926213  |
| H | 1.387163 | 2.808291  | -0.607170 |

**Complex 3 - [Pt(PBu<sub>2</sub>Ph)<sub>2</sub>]**

|    |           |           |           |
|----|-----------|-----------|-----------|
| Pt | 0.008185  | 0.052728  | -0.014029 |
| P  | -2.220047 | 0.681407  | -0.060341 |
| P  | 2.202936  | -0.652857 | 0.080868  |
| C  | 3.371027  | 0.788348  | -0.182917 |
| C  | 4.269067  | 0.944708  | -1.256564 |
| C  | 3.290045  | 1.850655  | 0.746023  |
| C  | 5.044613  | 2.101157  | -1.397644 |
| H  | 4.375831  | 0.172391  | -2.016123 |
| C  | 4.089018  | 2.988678  | 0.629626  |
| H  | 2.583716  | 1.793223  | 1.575225  |
| C  | 4.968581  | 3.127033  | -0.450629 |
| H  | 5.713018  | 2.194427  | -2.258851 |
| H  | 4.012973  | 3.779015  | 1.383467  |
| H  | 5.580067  | 4.025884  | -0.556942 |
| C  | -3.291938 | -0.834528 | 0.111247  |
| C  | -2.876725 | -1.967660 | -0.617379 |
| C  | -4.461522 | -0.949858 | 0.884680  |
| C  | -3.613933 | -3.153348 | -0.601137 |
| H  | -1.950240 | -1.916009 | -1.194231 |
| C  | -5.178756 | -2.150577 | 0.935950  |
| H  | -4.832852 | -0.106219 | 1.465828  |
| C  | -4.767117 | -3.252925 | 0.185595  |
| H  | -3.277203 | -4.007844 | -1.196475 |
| H  | -6.068470 | -2.218491 | 1.568720  |
| H  | -5.334733 | -4.186813 | 0.218800  |
| C  | -2.857133 | 1.421274  | -1.734050 |
| C  | -2.402655 | 2.886348  | -1.871046 |
| H  | -2.987584 | 3.567562  | -1.236890 |
| H  | -1.336873 | 3.011682  | -1.632734 |
| H  | -2.552343 | 3.213478  | -2.914768 |
| C  | -2.186516 | 0.610936  | -2.863284 |
| H  | -2.453043 | 1.062478  | -3.835248 |
| H  | -1.091363 | 0.614614  | -2.762690 |
| H  | -2.526368 | -0.434866 | -2.884723 |
| C  | -4.383715 | 1.324220  | -1.895941 |
| H  | -4.934247 | 1.841828  | -1.095998 |
| H  | -4.676727 | 1.791604  | -2.852299 |
| H  | -4.725092 | 0.279589  | -1.919083 |
| C  | -2.619017 | 1.882694  | 1.398662  |
| C  | -1.555502 | 3.006487  | 1.374800  |
| H  | -1.767816 | 3.770463  | 0.616636  |
| H  | -1.544589 | 3.513232  | 2.355945  |
| H  | -0.551456 | 2.599392  | 1.181657  |
| C  | -2.402861 | 1.079507  | 2.700182  |
| H  | -1.364222 | 0.725159  | 2.771365  |
| H  | -2.598397 | 1.739371  | 3.562003  |
| H  | -3.065568 | 0.205388  | 2.791339  |
| C  | -4.013673 | 2.537761  | 1.405692  |
| H  | -4.086390 | 3.209818  | 2.277878  |
| H  | -4.188674 | 3.156337  | 0.514438  |
| H  | -4.841370 | 1.819410  | 1.482937  |
| C  | 2.745524  | -1.344144 | 1.824056  |
| C  | 2.572611  | -1.960330 | -1.293128 |
| C  | 4.246303  | -1.160978 | 2.107996  |
| H  | 4.550075  | -0.104852 | 2.094585  |
| H  | 4.472684  | -1.556683 | 3.113638  |
| H  | 4.878926  | -1.702538 | 1.389401  |
| C  | 1.921787  | -0.595171 | 2.893777  |
| H  | 0.843243  | -0.690563 | 2.699132  |
| H  | 2.146077  | -1.026667 | 3.884290  |
| C  | 2.156355  | 0.476933  | 2.946106  |
| C  | 2.390906  | -2.837559 | 1.957809  |
| H  | 1.359597  | -3.056698 | 1.648429  |
| H  | 3.074742  | -3.481746 | 1.389244  |
| H  | 2.486464  | -3.127303 | 3.018625  |
| C  | 4.019566  | -2.488231 | -1.318450 |
| H  | 4.265536  | -3.032943 | -0.395069 |
| H  | 4.133313  | -3.200880 | -2.153735 |
| H  | 4.775519  | -1.702187 | -1.448769 |
| C  | 1.610024  | -3.160843 | -1.121312 |
| H  | 1.513437  | -3.678735 | -2.090809 |
| H  | 1.970806  | -3.899278 | -0.395841 |
| H  | 0.605602  | -2.829851 | -0.815768 |

|   |          |           |           |
|---|----------|-----------|-----------|
| C | 2.182575 | -1.305607 | -2.641014 |
| H | 2.431415 | -2.003236 | -3.460263 |
| H | 1.099494 | -1.115480 | -2.666633 |
| H | 2.681485 | -0.352664 | -2.848968 |

**Complex 4 - [Pt(PBu<sub>3</sub>)<sub>2</sub>]**

|    |           |           |           |
|----|-----------|-----------|-----------|
| Pt | -0.001320 | 0.005206  | 0.010828  |
| P  | 2.330531  | -0.008064 | 0.005512  |
| P  | -2.334854 | 0.000859  | -0.003191 |
| C  | 3.008905  | 0.403737  | -1.773675 |
| C  | 2.746242  | -0.812093 | -2.687430 |
| H  | 3.438905  | -1.641586 | -2.492509 |
| H  | 1.716845  | -1.181017 | -2.594359 |
| H  | 2.904795  | -0.507882 | -3.736761 |
| C  | 2.173384  | 1.604569  | -2.322150 |
| H  | 2.804408  | 2.496616  | -2.475840 |
| H  | 1.726704  | 1.347310  | -3.298024 |
| H  | 1.337493  | 1.877741  | -1.659612 |
| C  | 4.511160  | 0.742805  | -1.862031 |
| H  | 5.152512  | -0.060491 | -1.474873 |
| H  | 4.779676  | 0.893843  | -2.922328 |
| H  | 4.769437  | 1.669466  | -1.332819 |
| C  | 2.985497  | -1.766267 | 0.546965  |
| C  | 2.120881  | -2.828950 | -0.179313 |
| H  | 2.471613  | -3.022803 | -1.203777 |
| H  | 2.184951  | -3.783191 | 0.372110  |
| H  | 1.061655  | -2.522253 | -0.226784 |
| C  | 2.717260  | -1.922255 | 2.060251  |
| H  | 2.800017  | -2.991171 | 2.334630  |
| H  | 3.440734  | -1.370263 | 2.681794  |
| H  | 1.700205  | -1.592781 | 2.320111  |
| C  | 4.467983  | -2.070045 | 0.264124  |
| H  | 4.682078  | -3.105736 | 0.580476  |
| H  | 4.711786  | -2.014154 | -0.807949 |
| H  | 5.157309  | -1.410309 | 0.807851  |
| C  | -3.047482 | -0.343756 | 1.781584  |
| C  | -2.991867 | 1.741407  | -0.604579 |
| C  | -4.505543 | -0.834914 | 1.834285  |
| H  | -4.624326 | -1.842584 | 1.415441  |
| H  | -4.827103 | -0.885709 | 2.889294  |
| H  | -5.202519 | -0.163931 | 1.311035  |
| C  | -2.135314 | -1.386824 | 2.467168  |
| H  | -1.080304 | -1.076738 | 2.417601  |
| H  | -2.427630 | -1.471231 | 3.527922  |
| H  | -2.210047 | -2.385988 | 2.021659  |
| C  | -2.934845 | 0.941725  | 2.625921  |
| H  | -1.927383 | 1.379110  | 2.578749  |
| H  | -3.662993 | 1.707211  | 2.331644  |
| H  | -3.137480 | 0.688253  | 3.680992  |
| C  | -4.490891 | 2.033431  | -0.393435 |
| H  | -4.805424 | 1.915173  | 0.652098  |
| H  | -4.685385 | 3.085211  | -0.663656 |
| H  | -5.145671 | 1.411763  | -1.019453 |
| C  | -2.163144 | 2.826375  | 0.137863  |
| H  | -2.188242 | 3.759584  | -0.449569 |
| H  | -2.571004 | 3.057896  | 1.133308  |
| H  | -1.108534 | 2.519652  | 0.255796  |
| C  | -2.663181 | 1.876395  | -2.109972 |
| H  | -3.378959 | 1.342670  | -2.755349 |
| H  | -2.708425 | 2.944278  | -2.389265 |
| H  | -1.645574 | 1.526160  | -2.334354 |
| C  | 3.044147  | 1.333097  | 1.227594  |
| C  | 2.176548  | 1.338043  | 2.506782  |
| H  | 2.461356  | 2.207129  | 3.123702  |
| H  | 1.109226  | 1.418434  | 2.254667  |
| H  | 2.308515  | 0.438417  | 3.120524  |
| C  | 4.519207  | 1.145906  | 1.627416  |
| H  | 4.832405  | 2.001247  | 2.253125  |
| H  | 4.674933  | 0.239070  | 2.228171  |
| H  | 5.198900  | 1.104876  | 0.764394  |
| C  | 2.869317  | 2.727622  | 0.589636  |
| H  | 1.821744  | 2.918395  | 0.318536  |
| H  | 3.165549  | 3.490817  | 1.331166  |
| H  | 3.491075  | 2.881509  | -0.300449 |
| C  | -3.004864 | -1.385720 | -1.201646 |
| C  | -2.694478 | -2.757767 | -0.562933 |
| H  | -2.934374 | -3.550455 | -1.293018 |
| H  | -1.626556 | -2.846727 | -0.308956 |
| H  | -3.282640 | -2.960647 | 0.341517  |

|   |           |           |           |
|---|-----------|-----------|-----------|
| C | -4.503521 | -1.319335 | -1.555221 |
| H | -4.792126 | -0.354009 | -2.004308 |
| H | -4.718643 | -2.094870 | -2.310213 |
| H | -5.158341 | -1.507267 | -0.692442 |
| C | -2.191672 | -1.330452 | -2.519086 |
| H | -1.113136 | -1.230224 | -2.319615 |
| H | -2.352826 | -2.272777 | -3.069796 |
| H | -2.503783 | -0.513455 | -3.180345 |

**Complex 5 - [Pt(PEt<sub>3</sub>)<sub>3</sub>]**

|    |           |           |           |
|----|-----------|-----------|-----------|
| Pt | -0.025624 | 0.057424  | -0.021838 |
| P  | -2.367138 | 0.146450  | 0.073616  |
| P  | 0.990047  | -2.060264 | -0.099270 |
| P  | 1.208818  | 2.049933  | -0.027915 |
| C  | 2.136788  | 2.514643  | -1.591720 |
| H  | 2.727153  | 3.426832  | -1.391213 |
| H  | 1.369023  | 2.791288  | -2.335762 |
| C  | 2.580118  | 2.190161  | 1.240020  |
| H  | 3.395818  | 1.537756  | 0.881795  |
| H  | 2.979926  | 3.217893  | 1.237008  |
| C  | 0.241353  | 3.637111  | 0.271673  |
| H  | -0.552290 | 3.617174  | -0.493455 |
| H  | -0.278552 | 3.474575  | 1.231596  |
| C  | 0.954617  | 4.991247  | 0.267436  |
| H  | 0.238236  | 5.804749  | 0.471749  |
| H  | 1.739528  | 5.052001  | 1.038874  |
| H  | 1.425290  | 5.211502  | -0.703201 |
| C  | 2.159638  | 1.773142  | 2.653020  |
| H  | 1.277327  | 2.337782  | 2.999168  |
| H  | 1.900006  | 0.702790  | 2.687255  |
| H  | 2.973583  | 1.962485  | 3.375279  |
| C  | 3.032045  | 1.403007  | -2.150262 |
| H  | 3.763488  | 1.050655  | -1.403791 |
| H  | 2.424218  | 0.537867  | -2.456181 |
| H  | 3.599098  | 1.757350  | -3.028132 |
| C  | -3.254953 | 1.470060  | -0.907742 |
| H  | -4.344559 | 1.333444  | -0.804957 |
| H  | -3.010528 | 2.427992  | -0.413280 |
| C  | -3.111784 | 0.465021  | 1.757121  |
| H  | -2.820852 | 1.497477  | 2.020629  |
| H  | -4.211294 | 0.461729  | 1.673382  |
| C  | -3.287627 | -1.406410 | -0.472730 |
| H  | -2.911297 | -2.196618 | 0.197705  |
| H  | -2.878136 | -1.652474 | -1.466188 |
| C  | -2.649403 | -0.504452 | 2.847938  |
| H  | -2.824289 | -1.557085 | 2.564245  |
| H  | -1.570904 | -0.389848 | 3.042366  |
| H  | -3.197498 | -0.323354 | 3.789765  |
| C  | -4.816856 | -1.415596 | -0.511662 |
| H  | -5.218878 | -0.703704 | -1.250752 |
| H  | -5.190646 | -2.414613 | -0.792992 |
| H  | -5.263489 | -1.168234 | 0.464402  |
| C  | -2.844114 | 1.517875  | -2.382347 |
| H  | -1.798142 | 1.846992  | -2.488607 |
| H  | -2.923004 | 0.527162  | -2.864194 |
| H  | -3.490743 | 2.207893  | -2.954655 |
| C  | 0.470892  | -3.161798 | -1.518233 |
| H  | -0.584855 | -3.422188 | -1.324509 |
| H  | 1.039917  | -4.105581 | -1.475553 |
| C  | 0.630079  | -3.218794 | 1.324493  |
| H  | 1.031537  | -4.217496 | 1.078104  |
| H  | -0.466674 | -3.320363 | 1.353870  |
| C  | 2.866190  | -2.159745 | -0.202801 |
| H  | 3.132531  | -1.633382 | -1.135371 |
| H  | 3.234599  | -1.505744 | 0.604860  |
| C  | 1.160155  | -2.752424 | 2.683561  |
| H  | 0.655325  | -1.825491 | 3.004778  |
| H  | 0.979225  | -3.521598 | 3.456275  |
| H  | 2.248004  | -2.555865 | 2.660309  |
| C  | 3.566890  | -3.521067 | -0.142888 |
| H  | 3.250215  | -4.189677 | -0.959317 |
| H  | 4.659033  | -3.397368 | -0.231568 |
| H  | 3.377948  | -4.043991 | 0.808211  |
| C  | 0.612318  | -2.509939 | -2.897657 |
| H  | -0.053979 | -1.633899 | -2.989621 |
| H  | 1.646320  | -2.165343 | -3.077375 |
| H  | 0.367994  | -3.234549 | -3.697417 |

# Complex 6 - [Pt(PBu<sup>n</sup><sub>3</sub>)<sub>3</sub>]

|    |           |           |           |
|----|-----------|-----------|-----------|
| Pt | 0.154819  | 0.032931  | -0.069117 |
| P  | 0.756752  | 2.292480  | 0.156009  |
| P  | -2.116202 | -0.563748 | -0.130766 |
| P  | 1.884802  | -1.544705 | -0.177839 |
| C  | 2.132525  | -2.475280 | -1.782873 |
| H  | 2.873662  | -3.275554 | -1.619495 |
| H  | 2.591389  | -1.757754 | -2.484483 |
| C  | 1.822158  | -2.962309 | 1.043596  |
| H  | 0.984255  | -3.605798 | 0.727068  |
| H  | 2.738588  | -3.570884 | 0.945144  |
| C  | 3.626146  | -0.885869 | 0.093569  |
| H  | 3.728353  | -0.071777 | -0.644394 |
| H  | 3.597055  | -0.384434 | 1.076653  |
| C  | 4.838146  | -1.821144 | 0.010273  |
| H  | 4.745663  | -2.634615 | 0.751269  |
| H  | 4.870117  | -2.312186 | -0.978138 |
| C  | 1.617336  | -2.532226 | 2.500122  |
| H  | 2.396577  | -1.802793 | 2.792759  |
| H  | 0.656772  | -1.992431 | 2.579689  |
| C  | 0.857288  | -3.056980 | -2.401177 |
| H  | 0.366802  | -3.734526 | -1.678449 |
| H  | 0.140451  | -2.236719 | -2.578101 |
| C  | 2.095002  | 2.933687  | -0.982936 |
| H  | 2.265655  | 4.008544  | -0.793581 |
| H  | 3.016143  | 2.410781  | -0.672040 |
| C  | 1.512967  | 2.776295  | 1.796118  |
| H  | 2.501961  | 2.288620  | 1.814030  |
| H  | 1.700264  | 3.864769  | 1.811317  |
| C  | -0.603353 | 3.574502  | -0.061607 |
| H  | -1.360246 | 3.300734  | 0.691725  |
| H  | -1.065102 | 3.337331  | -1.036233 |
| C  | 0.710420  | 2.349876  | 3.028493  |
| H  | -0.312049 | 2.769327  | 2.979397  |
| H  | 0.585013  | 1.252776  | 3.007156  |
| C  | -0.269750 | 5.069702  | 0.013780  |
| H  | 0.487202  | 5.316508  | -0.749476 |
| H  | 0.193276  | 5.306458  | 0.988364  |
| C  | 1.843601  | 2.684279  | -2.473507 |
| H  | 1.740517  | 1.595644  | -2.639539 |
| H  | 0.876648  | 3.127507  | -2.777001 |
| C  | -3.147938 | 0.348731  | -1.397631 |
| H  | -3.161437 | 1.393757  | -1.043880 |
| H  | -4.190282 | -0.008522 | -1.373361 |
| C  | -3.101759 | -0.169612 | 1.407868  |
| H  | -4.137061 | -0.524397 | 1.275928  |
| H  | -3.147159 | 0.931099  | 1.454080  |
| C  | -2.526748 | -2.383939 | -0.430077 |
| H  | -2.292001 | -2.560878 | -1.494358 |
| H  | -1.735794 | -2.913949 | 0.123471  |
| C  | -2.488758 | -0.708723 | 2.705753  |
| H  | -1.459301 | -0.320489 | 2.784060  |
| H  | -2.393518 | -1.809538 | 2.647228  |
| C  | -3.879298 | -3.021839 | -0.068035 |
| H  | -3.744918 | -4.117424 | -0.145547 |
| H  | -4.109991 | -2.838214 | 0.996523  |
| C  | -2.600800 | 0.306600  | -2.827390 |
| H  | -1.560621 | 0.680244  | -2.823201 |
| H  | -2.545350 | -0.739569 | -3.181547 |
| C  | -3.443450 | 1.119788  | -3.820404 |
| H  | -3.547699 | 2.155319  | -3.446244 |
| H  | -4.469199 | 0.707261  | -3.848214 |
| C  | -5.096591 | -2.642381 | -0.919689 |
| H  | -5.361651 | -1.584281 | -0.754902 |
| H  | -4.835021 | -2.726661 | -1.990630 |
| C  | -6.319733 | -3.513155 | -0.622568 |
| H  | -7.186518 | -3.218404 | -1.235367 |
| H  | -6.112895 | -4.577523 | -0.828455 |
| H  | -6.619168 | -3.435890 | 0.437045  |
| C  | 1.358666  | 2.774547  | 4.353317  |
| H  | 1.411553  | 3.878367  | 4.393554  |
| H  | 2.407353  | 2.423752  | 4.375952  |
| C  | 0.618811  | 2.252793  | 5.586323  |
| H  | -0.431718 | 2.591926  | 5.598558  |

|   |           |           |           |
|---|-----------|-----------|-----------|
| H | 0.607721  | 1.149377  | 5.605838  |
| H | 1.091580  | 2.599152  | 6.520781  |
| C | -1.480216 | 5.997102  | -0.193277 |
| H | -1.112243 | 7.033963  | -0.288264 |
| H | -1.956777 | 5.757550  | -1.161435 |
| C | -2.529879 | 5.945039  | 0.919273  |
| H | -2.980278 | 4.944142  | 1.018535  |
| H | -2.088468 | 6.207722  | 1.895819  |
| H | -3.350780 | 6.654191  | 0.725432  |
| C | 2.948761  | 3.248628  | -3.374967 |
| H | 3.932571  | 2.894672  | -3.014831 |
| H | 2.970867  | 4.349013  | -3.270506 |
| C | 2.781484  | 2.877779  | -4.851240 |
| H | 3.562176  | 3.341599  | -5.474560 |
| H | 2.845418  | 1.785505  | -4.997252 |
| H | 1.802078  | 3.205693  | -5.241268 |
| C | 6.170878  | -1.094876 | 0.239272  |
| H | 6.259745  | -0.267732 | -0.487743 |
| H | 6.157054  | -0.616843 | 1.235880  |
| C | 7.391751  | -2.008556 | 0.125291  |
| H | 7.454360  | -2.468948 | -0.875371 |
| H | 8.329362  | -1.455259 | 0.295674  |
| H | 7.350946  | -2.827766 | 0.861975  |
| C | 1.640119  | -3.701410 | 3.494780  |
| H | 0.905983  | -4.465991 | 3.178628  |
| H | 2.627722  | -4.197283 | 3.449883  |
| C | 1.348864  | -3.274997 | 4.934671  |
| H | 2.059958  | -2.501496 | 5.276038  |
| H | 0.333346  | -2.851003 | 5.027252  |
| H | 1.421796  | -4.124900 | 5.633852  |
| C | 1.106530  | -3.822018 | -3.707076 |
| H | 1.595819  | -3.149204 | -4.435526 |
| H | 1.829417  | -4.637274 | -3.519879 |
| C | -0.167710 | -4.403159 | -4.323090 |
| H | -0.665136 | -5.101937 | -3.628411 |
| H | -0.893492 | -3.608757 | -4.566555 |
| H | 0.045786  | -4.955235 | -5.253259 |
| C | -2.863463 | 1.147209  | -5.235624 |
| H | -3.527734 | 1.680236  | -5.936222 |
| H | -1.882059 | 1.652149  | -5.256372 |
| H | -2.716082 | 0.126072  | -5.628464 |
| C | -3.268601 | -0.343436 | 3.980424  |
| H | -2.651606 | -0.616015 | 4.854766  |
| H | -3.392237 | 0.754190  | 4.028817  |
| C | -4.637996 | -1.018861 | 4.111440  |
| H | -5.121459 | -0.764964 | 5.069065  |
| H | -5.329280 | -0.715701 | 3.307652  |
| H | -4.541265 | -2.118212 | 4.068581  |

# **Complex 7 - [Pt(P(CH<sub>2</sub>Ph)<sub>3</sub>)<sub>3</sub>]**

|    |           |           |           |
|----|-----------|-----------|-----------|
| Pt | -0.026308 | -0.074496 | 0.117452  |
| P  | 0.077994  | 2.271228  | 0.215446  |
| P  | 1.915046  | -1.312232 | 0.605149  |
| P  | -1.961717 | -1.134847 | -0.696166 |
| C  | -0.883794 | 3.169072  | 1.571217  |
| H  | -0.759622 | 4.247528  | 1.369976  |
| H  | -0.302702 | 2.960172  | 2.482779  |
| C  | 1.694953  | 3.138367  | 0.641096  |
| H  | 1.476605  | 4.205711  | 0.817780  |
| H  | 1.963962  | 2.716778  | 1.625118  |
| C  | -0.430416 | 3.186231  | -1.375132 |
| H  | -1.484295 | 2.911511  | -1.535588 |
| H  | 0.137716  | 2.684390  | -2.172175 |
| C  | 3.246484  | -0.476499 | 1.643206  |
| H  | 4.049983  | -1.209615 | 1.842003  |
| H  | 3.685906  | 0.280159  | 0.975537  |
| C  | 2.910090  | -1.588841 | -0.988598 |
| H  | 2.219622  | -2.089243 | -1.682149 |
| H  | 3.048359  | -0.573677 | -1.384301 |
| C  | 2.012904  | -3.013975 | 1.433898  |
| H  | 3.058206  | -3.347574 | 1.300784  |
| H  | 1.903973  | -2.825949 | 2.512051  |
| C  | -1.701511 | -2.181767 | -2.237378 |
| H  | -1.314241 | -3.140419 | -1.866606 |
| H  | -2.688482 | -2.401406 | -2.681038 |
| C  | -3.447771 | -0.042838 | -1.176563 |
| H  | -3.781146 | 0.379121  | -0.217290 |
| H  | -3.005931 | 0.794255  | -1.738055 |
| C  | -2.808819 | -2.445566 | 0.374319  |
| H  | -3.775044 | -2.702866 | -0.088524 |
| H  | -2.159062 | -3.330492 | 0.288585  |
| C  | -4.605522 | -0.635909 | -1.939832 |
| C  | -4.576704 | -0.732465 | -3.345858 |
| C  | -5.758606 | -1.100898 | -1.281170 |
| C  | -5.641338 | -1.291750 | -4.057485 |
| H  | -3.707856 | -0.358839 | -3.894436 |
| C  | -6.827695 | -1.663338 | -1.987491 |
| H  | -5.830616 | -1.004369 | -0.196716 |
| C  | -6.770905 | -1.765376 | -3.381483 |
| H  | -5.590560 | -1.351777 | -5.147503 |
| H  | -7.708193 | -2.013355 | -1.446285 |
| H  | -7.605052 | -2.202720 | -3.937229 |
| C  | -0.764138 | -1.653588 | -3.302691 |
| C  | 0.114247  | -2.538147 | -3.954634 |
| C  | -0.757505 | -0.308871 | -3.713071 |
| C  | 0.959130  | -2.102687 | -4.980816 |
| H  | 0.131554  | -3.590767 | -3.658356 |
| C  | 0.081215  | 0.131321  | -4.741957 |
| H  | -1.408502 | 0.411966  | -3.218907 |
| C  | 0.943909  | -0.763992 | -5.382434 |
| H  | 1.631533  | -2.812626 | -5.467280 |
| H  | 0.059409  | 1.182519  | -5.042282 |
| H  | 1.600398  | -0.421259 | -6.186818 |
| C  | -2.982004 | -2.095053 | 1.834510  |
| C  | -1.945224 | -2.339819 | 2.749917  |
| C  | -4.179232 | -1.548980 | 2.330176  |
| C  | -2.095124 | -2.050248 | 4.108283  |
| H  | -1.015010 | -2.783824 | 2.387291  |
| C  | -4.332876 | -1.252732 | 3.687425  |
| H  | -5.011236 | -1.361197 | 1.648338  |
| C  | -3.292187 | -1.501846 | 4.584163  |
| H  | -1.275731 | -2.262029 | 4.799549  |
| H  | -5.272103 | -0.827335 | 4.041796  |
| H  | -3.412826 | -1.274681 | 5.646387  |
| C  | 1.085029  | -4.139039 | 1.036182  |
| C  | 0.632397  | -5.034370 | 2.020890  |
| C  | 0.699872  | -4.386855 | -0.292238 |
| C  | -0.159101 | -6.140406 | 1.698306  |
| H  | 0.915556  | -4.867270 | 3.065074  |
| C  | -0.090266 | -5.493263 | -0.623996 |
| H  | 1.015134  | -3.706289 | -1.082446 |
| C  | -0.522826 | -6.377807 | 0.369290  |
| H  | -0.492743 | -6.817710 | 2.488473  |

|   |           |           |           |
|---|-----------|-----------|-----------|
| H | -0.368647 | -5.667113 | -1.666383 |
| H | -1.139267 | -7.242660 | 0.109413  |
| C | 4.234594  | -2.308520 | -0.926111 |
| C | 5.437900  | -1.595041 | -0.771204 |
| C | 4.312506  | -3.709442 | -1.037915 |
| C | 6.668689  | -2.255807 | -0.717708 |
| H | 5.410855  | -0.504088 | -0.708751 |
| C | 5.541663  | -4.373010 | -0.984177 |
| H | 3.398131  | -4.290803 | -1.177946 |
| C | 6.726481  | -3.649428 | -0.820336 |
| H | 7.588997  | -1.676556 | -0.602475 |
| H | 5.572029  | -5.462234 | -1.075687 |
| H | 7.689269  | -4.166055 | -0.780883 |
| C | 2.855387  | 0.205457  | 2.942321  |
| C | 3.573017  | 1.348290  | 3.344051  |
| C | 1.844850  | -0.265207 | 3.799639  |
| C | 3.307892  | 1.982474  | 4.560973  |
| H | 4.352799  | 1.746375  | 2.687351  |
| C | 1.584177  | 0.360750  | 5.021620  |
| H | 1.241923  | -1.129182 | 3.515846  |
| C | 2.316602  | 1.486860  | 5.411873  |
| H | 3.880812  | 2.871702  | 4.840921  |
| H | 0.797682  | -0.035481 | 5.670953  |
| H | 2.111544  | 1.976954  | 6.366434  |
| C | 2.899177  | 3.045722  | -0.274499 |
| C | 3.985802  | 3.908005  | -0.028536 |
| C | 3.002782  | 2.154285  | -1.353493 |
| C | 5.132132  | 3.880146  | -0.824791 |
| H | 3.923988  | 4.619838  | 0.799877  |
| C | 4.149407  | 2.125531  | -2.158597 |
| H | 2.178302  | 1.470372  | -1.567077 |
| C | 5.219652  | 2.985487  | -1.898034 |
| H | 5.958026  | 4.564286  | -0.610485 |
| H | 4.201194  | 1.425008  | -2.996875 |
| H | 6.112758  | 2.964091  | -2.527600 |
| C | -0.235208 | 4.681034  | -1.458022 |
| C | 0.925536  | 5.221458  | -2.042850 |
| C | -1.200152 | 5.581771  | -0.967902 |
| C | 1.122650  | 6.602825  | -2.119879 |
| H | 1.684805  | 4.548178  | -2.446140 |
| C | -1.005951 | 6.964471  | -1.043881 |
| H | -2.125765 | 5.201531  | -0.530398 |
| C | 0.159215  | 7.482617  | -1.616550 |
| H | 2.034155  | 6.992753  | -2.580534 |
| H | -1.774821 | 7.639178  | -0.657584 |
| H | 0.311567  | 8.563350  | -1.676909 |
| C | -2.341685 | 2.883519  | 1.847214  |
| C | -3.344535 | 3.021598  | 0.871040  |
| C | -2.749245 | 2.571071  | 3.156063  |
| C | -4.697410 | 2.876736  | 1.193106  |
| H | -3.075449 | 3.247144  | -0.161216 |
| C | -4.100574 | 2.432585  | 3.485216  |
| H | -1.990688 | 2.447307  | 3.933875  |
| C | -5.083792 | 2.589838  | 2.504910  |
| H | -5.452292 | 2.993278  | 0.411041  |
| H | -4.384442 | 2.201185  | 4.515165  |
| H | -6.141625 | 2.488447  | 2.759287  |



# Complex 8 - [Pt(Pcy<sub>3</sub>)<sub>3</sub>], cy = cyclohexil

|    |           |           |           |
|----|-----------|-----------|-----------|
| Pt | 0.053485  | 0.110184  | 0.005758  |
| P  | -1.597592 | -1.650051 | 0.062774  |
| P  | 2.363074  | -0.590978 | -0.205529 |
| P  | -0.792561 | 2.332102  | 0.168747  |
| C  | -2.686153 | 2.477271  | 0.662927  |
| C  | -3.013918 | 3.039103  | 2.060963  |
| C  | -3.642315 | 3.115301  | -0.365425 |
| H  | -2.931605 | 1.402902  | 0.697748  |
| C  | -4.484352 | 2.824628  | 2.452993  |
| H  | -2.834914 | 4.124732  | 2.061342  |
| H  | -2.354542 | 2.599170  | 2.826480  |
| C  | -5.119958 | 2.930718  | 0.021832  |
| H  | -3.429516 | 4.195509  | -0.454342 |
| H  | -3.489535 | 2.681769  | -1.363443 |
| C  | -5.423081 | 3.463408  | 1.425162  |
| H  | -4.661404 | 3.252541  | 3.455753  |
| H  | -4.700913 | 1.742692  | 2.531005  |
| H  | -5.760311 | 3.425778  | -0.728901 |
| H  | -5.373435 | 1.855119  | -0.016589 |
| H  | -6.478465 | 3.283941  | 1.690926  |
| H  | -5.280169 | 4.560854  | 1.435612  |
| C  | 0.266569  | 3.359203  | 1.426219  |
| C  | 1.607282  | 3.738459  | 0.767051  |
| C  | -0.246820 | 4.595472  | 2.198161  |
| H  | 0.479232  | 2.577506  | 2.177294  |
| C  | 2.658808  | 4.191606  | 1.788879  |
| H  | 1.427206  | 4.583004  | 0.082704  |
| H  | 1.984798  | 2.902006  | 0.164215  |
| C  | 0.794002  | 5.086398  | 3.223070  |
| H  | -0.491306 | 5.410980  | 1.494799  |
| H  | -1.160391 | 4.368130  | 2.748605  |
| C  | 2.155638  | 5.393317  | 2.595197  |
| H  | 3.598499  | 4.446410  | 1.268807  |
| H  | 2.895800  | 3.356393  | 2.474162  |
| H  | 0.401028  | 5.973315  | 3.749417  |
| H  | 0.923182  | 4.303073  | 3.993814  |
| H  | 2.886324  | 5.678603  | 3.371543  |
| H  | 2.058013  | 6.266312  | 1.922252  |
| C  | -0.528709 | 3.241588  | -1.494670 |
| C  | -1.128531 | 2.460036  | -2.685101 |
| C  | -0.803583 | 4.757451  | -1.605180 |
| H  | 0.561708  | 3.107546  | -1.588733 |
| C  | -0.718989 | 3.052197  | -4.041002 |
| H  | -2.225450 | 2.459926  | -2.632000 |
| H  | -0.812780 | 1.406800  | -2.615419 |
| C  | -0.393360 | 5.312404  | -2.981069 |
| H  | -1.868832 | 4.978728  | -1.428910 |
| H  | -0.234741 | 5.302499  | -0.836124 |
| C  | -1.051235 | 4.545938  | -4.132701 |
| H  | -1.215845 | 2.492315  | -4.854360 |
| H  | 0.370010  | 2.915460  | -4.189224 |
| H  | -0.637265 | 6.387522  | -3.035544 |
| H  | 0.705456  | 5.238804  | -3.087831 |
| H  | -0.727176 | 4.955992  | -5.104953 |
| H  | -2.147796 | 4.684177  | -4.083382 |
| C  | -3.031074 | -1.126829 | -1.081455 |
| C  | -2.636518 | -1.274198 | -2.569448 |
| C  | -4.453816 | -1.650696 | -0.802957 |
| H  | -3.050982 | -0.041695 | -0.879778 |
| C  | -3.706222 | -0.704191 | -3.516625 |
| H  | -2.476418 | -2.334925 | -2.825194 |
| H  | -1.672436 | -0.768066 | -2.737544 |
| C  | -5.488108 | -1.048149 | -1.765816 |
| H  | -4.487357 | -2.748300 | -0.890180 |
| H  | -4.746527 | -1.408241 | 0.230114  |
| C  | -5.098283 | -1.280526 | -3.228477 |
| H  | -3.419499 | -0.903312 | -4.563565 |
| H  | -3.743929 | 0.395137  | -3.407234 |
| H  | -6.484678 | -1.473618 | -1.551995 |
| H  | -5.568977 | 0.039092  | -1.581010 |
| H  | -5.847909 | -0.835199 | -3.904357 |
| H  | -5.098792 | -2.367457 | -3.435601 |
| C  | -2.393219 | -1.838843 | 1.788953  |
| C  | -3.345439 | -3.024947 | 2.062222  |
| C  | -1.294893 | -1.796116 | 2.876929  |
| H  | -2.976560 | -0.902620 | 1.881504  |
| C  | -3.942229 | -2.957108 | 3.478302  |
| H  | -2.781958 | -3.970964 | 1.979515  |

|   |           |           |           |
|---|-----------|-----------|-----------|
| H | -4.153741 | -3.078881 | 1.319319  |
| C | -1.852984 | -1.798172 | 4.308113  |
| H | -0.641083 | -2.676258 | 2.758950  |
| H | -0.656001 | -0.913153 | 2.711587  |
| C | -2.843938 | -2.945319 | 4.543310  |
| H | -4.619326 | -3.812941 | 3.637381  |
| H | -4.558809 | -2.046912 | 3.576800  |
| H | -1.012450 | -1.876660 | 5.024051  |
| H | -2.346898 | -0.828719 | 4.518604  |
| H | -3.279730 | -2.879685 | 5.554548  |
| H | -2.301936 | -3.906703 | 4.501915  |
| C | -1.169367 | -3.437276 | -0.505325 |
| C | -0.286636 | -4.172292 | 0.525126  |
| C | -2.275648 | -4.397610 | -0.995668 |
| H | -0.528025 | -3.222123 | -1.380044 |
| C | 0.294134  | -5.490255 | -0.010841 |
| H | -0.888353 | -4.400218 | 1.418120  |
| H | 0.525722  | -3.516057 | 0.864122  |
| C | -1.663955 | -5.675372 | -1.595515 |
| H | -2.932160 | -4.678041 | -0.160630 |
| H | -2.916520 | -3.920199 | -1.744082 |
| C | -0.793969 | -6.414413 | -0.572641 |
| H | 0.851413  | -6.001228 | 0.794070  |
| H | 1.028008  | -5.270880 | -0.805892 |
| H | -2.461378 | -6.337081 | -1.977519 |
| H | -1.043277 | -5.400815 | -2.469036 |
| H | -0.338304 | -7.312289 | -1.023954 |
| H | -1.436719 | -6.774052 | 0.252492  |
| C | 3.792231  | 0.727859  | -0.230786 |
| C | 5.136627  | 0.468043  | 0.483185  |
| C | 4.090064  | 1.362403  | -1.607723 |
| H | 3.281267  | 1.502967  | 0.369281  |
| C | 5.945816  | 1.769370  | 0.625434  |
| H | 5.730083  | -0.275228 | -0.078520 |
| H | 4.978320  | 0.056447  | 1.486548  |
| C | 4.917358  | 2.653351  | -1.502323 |
| H | 4.683967  | 0.645945  | -2.200381 |
| H | 3.160715  | 1.557283  | -2.165114 |
| C | 6.222897  | 2.429487  | -0.728446 |
| H | 6.890754  | 1.565857  | 1.160355  |
| H | 5.374910  | 2.472533  | 1.261240  |
| H | 5.140594  | 3.026635  | -2.517118 |
| H | 4.321833  | 3.440050  | -1.005669 |
| H | 6.763878  | 3.381525  | -0.594921 |
| H | 6.891059  | 1.771979  | -1.317656 |
| C | 2.454530  | -1.792019 | -1.718822 |
| C | 2.770254  | -1.093420 | -3.058570 |
| C | 3.225925  | -3.120626 | -1.615057 |
| H | 1.385670  | -2.064147 | -1.757125 |
| C | 2.533682  | -2.000584 | -4.276173 |
| H | 3.827816  | -0.792550 | -3.073464 |
| H | 2.176673  | -0.171136 | -3.159962 |
| C | 2.969531  | -4.017392 | -2.839077 |
| H | 4.312156  | -2.933486 | -1.517507 |
| H | 2.912584  | -3.669018 | -0.713788 |
| C | 3.317409  | -3.312041 | -4.153757 |
| H | 2.827737  | -1.461409 | -5.195819 |
| H | 1.453342  | -2.223636 | -4.376264 |
| H | 3.537124  | -4.958588 | -2.735633 |
| H | 1.898764  | -4.300132 | -2.859045 |
| H | 3.114010  | -3.969972 | -5.016306 |
| H | 4.404211  | -3.094815 | -4.172527 |
| C | 2.745749  | -1.618649 | 1.360738  |
| C | 4.028312  | -2.472456 | 1.504734  |
| C | 2.522714  | -0.717106 | 2.600539  |
| H | 1.902916  | -2.326923 | 1.343927  |
| C | 4.040321  | -3.249407 | 2.830564  |
| H | 4.928527  | -1.850216 | 1.458612  |
| H | 4.114475  | -3.183005 | 0.682426  |
| C | 2.610732  | -1.489209 | 3.926702  |
| H | 3.264845  | 0.103895  | 2.615857  |
| H | 1.534626  | -0.235685 | 2.508179  |
| C | 3.896747  | -2.316982 | 4.034716  |
| H | 4.971191  | -3.838325 | 2.900537  |
| H | 3.211871  | -3.981480 | 2.836050  |
| H | 2.534320  | -0.780518 | 4.772706  |
| H | 1.739180  | -2.167254 | 4.009808  |
| H | 3.905826  | -2.893079 | 4.975393  |
| H | 4.769640  | -1.639282 | 4.076478  |

**Complex 9 - [Pt(PPh<sub>3</sub>)<sub>2</sub>(PhC≡CPh)]**

|    |           |           |           |
|----|-----------|-----------|-----------|
| Pt | -0.000995 | 0.574415  | 0.002869  |
| P  | 1.893862  | -0.885711 | -0.039500 |
| C  | 0.618636  | 2.556579  | 0.123294  |
| C  | -0.664687 | 2.541344  | -0.117943 |
| P  | -1.872307 | -0.917862 | 0.042341  |
| C  | -1.985745 | -2.065550 | 1.497438  |
| C  | -2.982917 | -3.054682 | 1.594960  |
| C  | -1.147194 | -1.838986 | 2.598098  |
| C  | -3.117939 | -3.812381 | 2.759861  |
| H  | -3.668923 | -3.230245 | 0.763390  |
| C  | -1.293462 | -2.588291 | 3.771710  |
| H  | -0.381632 | -1.063569 | 2.534168  |
| C  | -2.274079 | -3.579213 | 3.853223  |
| H  | -3.893157 | -4.580712 | 2.819126  |
| H  | -0.632162 | -2.396467 | 4.619770  |
| H  | -2.386931 | -4.167759 | 4.767376  |
| C  | -2.139270 | -1.975223 | -1.450073 |
| C  | -2.511013 | -1.347700 | -2.654762 |
| C  | -1.882822 | -3.355837 | -1.464925 |
| C  | -2.655733 | -2.086303 | -3.831075 |
| H  | -2.693082 | -0.270452 | -2.677145 |
| C  | -2.022995 | -4.094195 | -2.645616 |
| H  | -1.568913 | -3.867141 | -0.553475 |
| C  | -2.416141 | -3.465472 | -3.829427 |
| H  | -2.955254 | -1.581360 | -4.752989 |
| H  | -1.821662 | -5.168381 | -2.635652 |
| H  | -2.529350 | -4.044356 | -4.749422 |
| C  | -3.520408 | -0.080641 | 0.286330  |
| C  | -3.587761 | 0.934278  | 1.256154  |
| C  | -4.704014 | -0.479480 | -0.355770 |
| C  | -4.807803 | 1.529836  | 1.583410  |
| H  | -2.674087 | 1.263469  | 1.756759  |
| C  | -5.923915 | 0.130440  | -0.039799 |
| H  | -4.687341 | -1.271638 | -1.106069 |
| C  | -5.980863 | 1.133067  | 0.932140  |
| H  | -4.839597 | 2.315875  | 2.342097  |
| H  | -6.834558 | -0.188136 | -0.554066 |
| H  | -6.934950 | 1.604875  | 1.180743  |
| C  | 3.531005  | -0.025089 | -0.277083 |
| C  | 3.588526  | 0.985738  | -1.251980 |
| C  | 4.716450  | -0.401656 | 0.374595  |
| C  | 4.801504  | 1.596860  | -1.576486 |
| H  | 2.673006  | 1.298919  | -1.759622 |
| C  | 5.929033  | 0.224493  | 0.061640  |
| H  | 4.707062  | -1.188869 | 1.130147  |
| C  | 5.976791  | 1.221276  | -0.916657 |
| H  | 4.825937  | 2.378757  | -2.339731 |
| H  | 6.841242  | -0.077165 | 0.583224  |
| H  | 6.925267  | 1.705292  | -1.163322 |
| C  | 2.175240  | -1.948717 | 1.446172  |
| C  | 2.524897  | -1.320418 | 2.657165  |
| C  | 1.954139  | -3.335471 | 1.449862  |
| C  | 2.683204  | -2.063507 | 3.828888  |
| H  | 2.678257  | -0.238809 | 2.687852  |
| C  | 2.107221  | -4.078440 | 2.626186  |
| H  | 1.658118  | -3.848244 | 0.533233  |
| C  | 2.478848  | -3.448397 | 3.816237  |
| H  | 2.965426  | -1.557840 | 4.755873  |
| H  | 1.933633  | -5.157394 | 2.607673  |
| H  | 2.602764  | -4.030907 | 4.732610  |
| C  | 2.024244  | -2.021231 | -1.502551 |
| C  | 3.041799  | -2.988388 | -1.611026 |
| C  | 1.174916  | -1.806527 | -2.597237 |
| C  | 3.186107  | -3.737139 | -2.780626 |
| H  | 3.736768  | -3.153050 | -0.784670 |
| C  | 1.330020  | -2.546879 | -3.775484 |
| H  | 0.394026  | -1.047138 | -2.524915 |
| C  | 2.330709  | -3.516659 | -3.867674 |
| H  | 3.977511  | -4.488150 | -2.848627 |
| H  | 0.659614  | -2.364840 | -4.618516 |
| H  | 2.450476  | -4.098238 | -4.785479 |
| C  | 1.737005  | 3.471703  | 0.309986  |
| C  | 2.742173  | 3.224271  | 1.266974  |

|   |           |          |           |
|---|-----------|----------|-----------|
| C | 1.821280  | 4.659921 | -0.450623 |
| C | 3.783755  | 4.133005 | 1.466125  |
| H | 2.690112  | 2.309382 | 1.861626  |
| C | 2.869558  | 5.561431 | -0.257702 |
| H | 1.053407  | 4.867906 | -1.200301 |
| C | 3.855394  | 5.304356 | 0.703213  |
| H | 4.548301  | 3.922807 | 2.219104  |
| H | 2.916381  | 6.473077 | -0.859856 |
| H | 4.674513  | 6.012019 | 0.855087  |
| C | -1.808584 | 3.423535 | -0.308055 |
| C | -2.777018 | 3.169711 | -1.300098 |
| C | -1.957453 | 4.583264 | 0.484610  |
| C | -3.844808 | 4.046334 | -1.503070 |
| H | -2.674371 | 2.276186 | -1.918918 |
| C | -3.033101 | 5.451656 | 0.288930  |
| H | -1.218810 | 4.795143 | 1.261323  |
| C | -3.981261 | 5.189491 | -0.707438 |
| H | -4.579170 | 3.832928 | -2.284408 |
| H | -3.130994 | 6.341315 | 0.917128  |
| H | -4.821440 | 5.871449 | -0.861660 |

**Complex 10 - [Pt(PPh<sub>3</sub>)<sub>2</sub>(PhC≡CMe)]**

|    |           |           |           |
|----|-----------|-----------|-----------|
| Pt | 0.156430  | 0.859403  | -0.125712 |
| P  | 1.356913  | -1.216387 | 0.062490  |
| C  | 1.435167  | 2.520658  | -0.225696 |
| C  | 0.210672  | 2.895114  | -0.464795 |
| P  | -2.171988 | 0.301018  | -0.045698 |
| C  | -2.836594 | -0.643628 | 1.407888  |
| C  | -4.206637 | -0.942008 | 1.533951  |
| C  | -1.976003 | -0.952621 | 2.471737  |
| C  | -4.696082 | -1.559349 | 2.686400  |
| H  | -4.903808 | -0.681139 | 0.733604  |
| C  | -2.469844 | -1.560449 | 3.633614  |
| H  | -0.916849 | -0.705883 | 2.391887  |
| C  | -3.826242 | -1.869470 | 3.741758  |
| H  | -5.760984 | -1.789857 | 2.767355  |
| H  | -1.783296 | -1.790595 | 4.452757  |
| H  | -4.212167 | -2.344933 | 4.647510  |
| C  | -2.872281 | -0.536673 | -1.538509 |
| C  | -2.748099 | 0.122767  | -2.777525 |
| C  | -3.430931 | -1.824910 | -1.517141 |
| C  | -3.200290 | -0.477002 | -3.955102 |
| H  | -2.290288 | 1.114716  | -2.824621 |
| C  | -3.877777 | -2.427766 | -2.699327 |
| H  | -3.516818 | -2.372751 | -0.577532 |
| C  | -3.770850 | -1.755601 | -3.919320 |
| H  | -3.102976 | 0.054885  | -4.905240 |
| H  | -4.310120 | -3.431330 | -2.661571 |
| H  | -4.123485 | -2.226545 | -4.840540 |
| C  | -3.258475 | 1.806221  | 0.141731  |
| C  | -2.959278 | 2.678366  | 1.204222  |
| C  | -4.377503 | 2.082097  | -0.659710 |
| C  | -3.757231 | 3.794632  | 1.460013  |
| H  | -2.086660 | 2.483886  | 1.833973  |
| C  | -5.171530 | 3.209147  | -0.409209 |
| H  | -4.644197 | 1.419818  | -1.485206 |
| C  | -4.866127 | 4.067547  | 0.649528  |
| H  | -3.507922 | 4.459738  | 2.291000  |
| H  | -6.036940 | 3.409738  | -1.046604 |
| H  | -5.488882 | 4.944554  | 0.843864  |
| C  | 3.183969  | -1.111271 | -0.295086 |
| C  | 3.582042  | -0.354630 | -1.410262 |
| C  | 4.158905  | -1.831959 | 0.414020  |
| C  | 4.916186  | -0.339156 | -1.822547 |
| H  | 2.837965  | 0.229097  | -1.957480 |
| C  | 5.499104  | -1.800883 | 0.011753  |
| H  | 3.880035  | -2.428524 | 1.285689  |
| C  | 5.881000  | -1.061114 | -1.111492 |
| H  | 5.205325  | 0.247499  | -2.698510 |
| H  | 6.245395  | -2.364387 | 0.577859  |
| H  | 6.926385  | -1.045879 | -1.429685 |
| C  | 1.319156  | -2.047168 | 1.716477  |
| C  | 1.865432  | -1.347736 | 2.811246  |
| C  | 0.696954  | -3.282828 | 1.954346  |
| C  | 1.819805  | -1.886321 | 4.098531  |
| H  | 2.330187  | -0.370170 | 2.657663  |
| C  | 0.647611  | -3.820308 | 3.245898  |
| H  | 0.236311  | -3.834605 | 1.133361  |
| C  | 1.214131  | -3.129199 | 4.320689  |
| H  | 2.257210  | -1.331546 | 4.933027  |
| H  | 0.159392  | -4.784231 | 3.409446  |
| H  | 1.176922  | -3.551467 | 5.327832  |
| C  | 0.972884  | -2.554471 | -1.170919 |
| C  | 1.610788  | -3.809927 | -1.133591 |
| C  | 0.127568  | -2.258977 | -2.250565 |
| C  | 1.383009  | -4.752470 | -2.138469 |
| H  | 2.302330  | -4.053414 | -0.323066 |
| C  | -0.091184 | -3.199844 | -3.265793 |
| H  | -0.352509 | -1.280650 | -2.301301 |
| C  | 0.529972  | -4.449256 | -3.209064 |
| H  | 1.882289  | -5.723989 | -2.092283 |
| H  | -0.751953 | -2.949200 | -4.099944 |
| H  | 0.358644  | -5.185189 | -3.999588 |
| C  | 2.774770  | 3.071758  | -0.067380 |
| C  | 3.798131  | 2.388448  | 0.618873  |

|   |           |          |           |
|---|-----------|----------|-----------|
| C | 3.067213  | 4.364918 | -0.565171 |
| C | 5.050061  | 2.975329 | 0.819421  |
| H | 3.598039  | 1.385118 | 0.995402  |
| C | 4.320254  | 4.946732 | -0.374192 |
| H | 2.293231  | 4.916894 | -1.104393 |
| C | 5.319738  | 4.257015 | 0.324943  |
| H | 5.822032  | 2.426792 | 1.365370  |
| H | 4.518372  | 5.946929 | -0.763643 |
| H | 6.298997  | 4.715633 | 0.483508  |
| C | -0.643072 | 4.072454 | -0.773330 |
| H | -1.602441 | 3.794056 | -1.228797 |
| H | -0.877760 | 4.634978 | 0.141901  |
| H | -0.125343 | 4.761845 | -1.456428 |

**Complex 11 - [Pt(PPh<sub>3</sub>)<sub>2</sub>(PhC≡CCO<sub>2</sub>Me)]**

|    |           |           |           |
|----|-----------|-----------|-----------|
| Pt | 0.196401  | 0.681956  | -0.091547 |
| P  | 1.284449  | -1.447506 | -0.000466 |
| C  | 1.585818  | 2.229603  | -0.053337 |
| C  | 0.406368  | 2.712767  | -0.349844 |
| P  | -2.131482 | 0.089309  | 0.003430  |
| C  | -2.660552 | -0.682105 | 1.606549  |
| C  | -3.975430 | -1.141665 | 1.809014  |
| C  | -1.769943 | -0.681871 | 2.689214  |
| C  | -4.377655 | -1.610889 | 3.060816  |
| H  | -4.697030 | -1.124568 | 0.989571  |
| C  | -2.177875 | -1.140255 | 3.947540  |
| H  | -0.753233 | -0.312967 | 2.544265  |
| C  | -3.479189 | -1.609930 | 4.134899  |
| H  | -5.400395 | -1.968982 | 3.201722  |
| H  | -1.470754 | -1.131910 | 4.779988  |
| H  | -3.797684 | -1.970647 | 5.116330  |
| C  | -2.809315 | -1.007268 | -1.319766 |
| C  | -2.939644 | -0.488155 | -2.622476 |
| C  | -3.105931 | -2.362414 | -1.101944 |
| C  | -3.391896 | -1.295170 | -3.668894 |
| H  | -2.689880 | 0.557116  | -2.822793 |
| C  | -3.551408 | -3.171578 | -2.153658 |
| H  | -2.990822 | -2.797031 | -0.107509 |
| C  | -3.703484 | -2.640186 | -3.436703 |
| H  | -3.498326 | -0.871723 | -4.671012 |
| H  | -3.780924 | -4.223476 | -1.964228 |
| H  | -4.056404 | -3.271984 | -4.255792 |
| C  | -3.320997 | 1.525522  | 0.027546  |
| C  | -2.998701 | 2.619572  | 0.848807  |
| C  | -4.560028 | 1.521928  | -0.633673 |
| C  | -3.893418 | 3.679752  | 1.009772  |
| H  | -2.036628 | 2.642355  | 1.367424  |
| C  | -5.450093 | 2.592007  | -0.483426 |
| H  | -4.846156 | 0.682614  | -1.268940 |
| C  | -5.122255 | 3.671730  | 0.340263  |
| H  | -3.625772 | 4.520062  | 1.655797  |
| H  | -6.407437 | 2.573369  | -1.011026 |
| H  | -5.820395 | 4.504164  | 0.460011  |
| C  | 3.135058  | -1.374648 | -0.216910 |
| C  | 3.619590  | -0.584034 | -1.274112 |
| C  | 4.049290  | -2.127374 | 0.536695  |
| C  | 4.981504  | -0.556038 | -1.578405 |
| H  | 2.923037  | 0.018195  | -1.863024 |
| C  | 5.418161  | -2.083545 | 0.242876  |
| H  | 3.704158  | -2.758344 | 1.357072  |
| C  | 5.887908  | -1.303463 | -0.816888 |
| H  | 5.338478  | 0.060226  | -2.407548 |
| H  | 6.116937  | -2.671326 | 0.844474  |
| H  | 6.955195  | -1.276801 | -1.050052 |
| C  | 1.057005  | -2.478151 | 1.516799  |
| C  | 1.607210  | -2.019509 | 2.728633  |
| C  | 0.280968  | -3.649460 | 1.532532  |
| C  | 1.423731  | -2.735635 | 3.913616  |
| H  | 2.187923  | -1.093334 | 2.751417  |
| C  | 0.089436  | -4.361145 | 2.722608  |
| H  | -0.180310 | -4.016568 | 0.614118  |
| C  | 0.666610  | -3.913755 | 3.913646  |
| H  | 1.870961  | -2.370286 | 4.841659  |
| H  | -0.515205 | -5.272041 | 2.713578  |
| H  | 0.522810  | -4.475248 | 4.840309  |
| C  | 0.933340  | -2.574113 | -1.431431 |
| C  | 1.470472  | -3.874237 | -1.502049 |
| C  | 0.234433  | -2.067556 | -2.536729 |
| C  | 1.283195  | -4.656131 | -2.643539 |
| H  | 2.049262  | -4.278862 | -0.667950 |
| C  | 0.058750  | -2.847139 | -3.686254 |
| H  | -0.167946 | -1.053634 | -2.496046 |
| C  | 0.576416  | -4.143365 | -3.739807 |
| H  | 1.700267  | -5.666181 | -2.682288 |
| H  | -0.489994 | -2.436340 | -4.537472 |
| H  | 0.436085  | -4.754443 | -4.635365 |
| C  | 2.967009  | 2.617049  | 0.188459  |
| C  | 3.782256  | 1.886264  | 1.077141  |

|   |           |          |           |
|---|-----------|----------|-----------|
| C | 3.511535  | 3.765750 | -0.430890 |
| C | 5.090641  | 2.291251 | 1.347147  |
| H | 3.372476  | 0.998424 | 1.559832  |
| C | 4.825345  | 4.158747 | -0.172585 |
| H | 2.889219  | 4.349334 | -1.111650 |
| C | 5.620265  | 3.425464 | 0.719697  |
| H | 5.701662  | 1.714613 | 2.045444  |
| H | 5.231193  | 5.046858 | -0.664597 |
| H | 6.647665  | 3.737847 | 0.924135  |
| C | -0.251875 | 3.963197 | -0.720298 |
| O | -1.210329 | 4.069305 | -1.457874 |
| O | 0.349181  | 5.037699 | -0.156909 |
| C | -0.208579 | 6.316425 | -0.467282 |
| H | -1.199125 | 6.432142 | 0.003633  |
| H | 0.487489  | 7.063496 | -0.064316 |
| H | -0.319244 | 6.442748 | -1.554969 |

**Complex 12 - [Pt(PPh<sub>3</sub>)<sub>2</sub>(PhC≡CH)]**

|    |           |           |           |
|----|-----------|-----------|-----------|
| Pt | 0.227174  | 0.930036  | -0.155610 |
| P  | 1.266879  | -1.216201 | 0.098568  |
| C  | 1.549662  | 2.584782  | -0.257450 |
| C  | 0.314154  | 2.954854  | -0.408802 |
| P  | -2.122253 | 0.484872  | -0.110840 |
| C  | -2.846089 | -0.170868 | 1.467158  |
| C  | -4.224613 | -0.427219 | 1.599651  |
| C  | -2.022021 | -0.298066 | 2.593813  |
| C  | -4.756623 | -0.824271 | 2.827857  |
| H  | -4.891994 | -0.306370 | 0.743061  |
| C  | -2.558080 | -0.685600 | 3.828324  |
| H  | -0.956121 | -0.083666 | 2.503455  |
| C  | -3.923454 | -0.953696 | 3.946830  |
| H  | -5.827892 | -1.023742 | 2.915524  |
| H  | -1.900520 | -0.778638 | 4.695808  |
| H  | -4.342728 | -1.257509 | 4.909659  |
| C  | -2.812416 | -0.589258 | -1.448384 |
| C  | -2.733859 | -0.136293 | -2.780030 |
| C  | -3.318896 | -1.876195 | -1.206674 |
| C  | -3.189675 | -0.932049 | -3.833160 |
| H  | -2.313666 | 0.848596  | -3.000344 |
| C  | -3.764130 | -2.677391 | -2.264462 |
| H  | -3.368583 | -2.265585 | -0.188732 |
| C  | -3.711007 | -2.206036 | -3.578119 |
| H  | -3.132888 | -0.556538 | -4.858036 |
| H  | -4.155106 | -3.676337 | -2.055013 |
| H  | -4.065553 | -2.830136 | -4.402093 |
| C  | -3.150349 | 2.037644  | -0.231163 |
| C  | -2.831504 | 3.084593  | 0.654296  |
| C  | -4.254677 | 2.194279  | -1.084388 |
| C  | -3.592089 | 4.255952  | 0.682282  |
| H  | -1.981597 | 2.977942  | 1.332889  |
| C  | -5.010569 | 3.373509  | -1.062912 |
| H  | -4.541949 | 1.395903  | -1.769778 |
| C  | -4.683084 | 4.407337  | -0.182168 |
| H  | -3.329595 | 5.054904  | 1.381068  |
| H  | -5.864924 | 3.476525  | -1.737620 |
| H  | -5.275874 | 5.325681  | -0.165406 |
| C  | 3.127096  | -1.241920 | -0.039081 |
| C  | 3.682367  | -0.653642 | -1.189485 |
| C  | 3.987045  | -1.865490 | 0.878553  |
| C  | 5.057974  | -0.692776 | -1.420840 |
| H  | 3.030893  | -0.156579 | -1.913398 |
| C  | 5.370230  | -1.887853 | 0.654589  |
| H  | 3.589068  | -2.344667 | 1.773380  |
| C  | 5.909791  | -1.306359 | -0.494925 |
| H  | 5.467654  | -0.235293 | -2.324374 |
| H  | 6.024668  | -2.372720 | 1.382775  |
| H  | 6.988576  | -1.331124 | -0.670909 |
| C  | 0.949040  | -2.049780 | 1.718603  |
| C  | 1.433677  | -1.433883 | 2.889286  |
| C  | 0.168738  | -3.210536 | 1.844316  |
| C  | 1.178154  | -1.987514 | 4.146033  |
| H  | 2.016142  | -0.511027 | 2.820306  |
| C  | -0.094601 | -3.759103 | 3.105316  |
| H  | -0.241746 | -3.696245 | 0.957557  |
| C  | 0.415407  | -3.156528 | 4.257927  |
| H  | 1.573061  | -1.501095 | 5.041879  |
| H  | -0.703274 | -4.664031 | 3.182172  |
| H  | 0.213903  | -3.589727 | 5.241036  |
| C  | 0.927018  | -2.507144 | -1.191604 |
| C  | 1.470434  | -3.803765 | -1.108382 |
| C  | 0.219901  | -2.142519 | -2.345037 |
| C  | 1.285687  | -4.717170 | -2.147576 |
| H  | 2.052589  | -4.101942 | -0.233386 |
| C  | 0.046132  | -3.054427 | -3.393521 |
| H  | -0.188645 | -1.133864 | -2.420720 |
| C  | 0.573437  | -4.343569 | -3.294801 |
| H  | 1.708578  | -5.722018 | -2.067589 |
| H  | -0.506696 | -2.751344 | -4.285600 |
| H  | 0.436828  | -5.057629 | -4.111020 |
| C  | 2.903942  | 3.115558  | -0.173216 |
| C  | 3.978741  | 2.358982  | 0.334607  |

|   |           |          |           |
|---|-----------|----------|-----------|
| C | 3.164248  | 4.445687 | -0.577407 |
| C | 5.258845  | 2.910889 | 0.441228  |
| H | 3.800901  | 1.327718 | 0.640894  |
| C | 4.442835  | 4.993263 | -0.471428 |
| H | 2.342988  | 5.048060 | -0.980023 |
| C | 5.498525  | 4.228418 | 0.039596  |
| H | 6.077396  | 2.302557 | 0.842138  |
| H | 4.618403  | 6.025617 | -0.791814 |
| H | 6.500487  | 4.658700 | 0.121854  |
| H | -0.353844 | 3.803826 | -0.539432 |

**Complex 13 - [Pt(PPh<sub>3</sub>)<sub>2</sub>(EtC≡CEt)]**

|    |           |           |           |
|----|-----------|-----------|-----------|
| Pt | -0.007788 | 1.003946  | -0.002518 |
| P  | 1.950344  | -0.366526 | 0.057055  |
| C  | 0.633457  | 3.001689  | 0.037867  |
| C  | -0.655589 | 2.999374  | -0.048815 |
| P  | -1.955127 | -0.379165 | -0.051425 |
| C  | -2.200035 | -1.725951 | 1.205006  |
| C  | -3.407998 | -2.444718 | 1.298703  |
| C  | -1.192143 | -1.973652 | 2.146839  |
| C  | -3.586263 | -3.405622 | 2.295557  |
| H  | -4.220992 | -2.246955 | 0.595930  |
| C  | -1.373613 | -2.931644 | 3.152822  |
| H  | -0.266226 | -1.400181 | 2.098887  |
| C  | -2.567773 | -3.651532 | 3.226326  |
| H  | -4.527518 | -3.958509 | 2.353282  |
| H  | -0.576771 | -3.107191 | 3.880074  |
| H  | -2.712168 | -4.397995 | 4.011578  |
| C  | -2.278267 | -1.185555 | -1.689362 |
| C  | -2.251263 | -0.360703 | -2.831674 |
| C  | -2.463091 | -2.566698 | -1.864093 |
| C  | -2.437630 | -0.898436 | -4.107126 |
| H  | -2.072212 | 0.712559  | -2.721788 |
| C  | -2.636741 | -3.106607 | -3.144487 |
| H  | -2.462305 | -3.235848 | -1.002623 |
| C  | -2.632405 | -2.276050 | -4.268037 |
| H  | -2.422391 | -0.240385 | -4.979829 |
| H  | -2.774529 | -4.185156 | -3.259320 |
| H  | -2.772267 | -2.699106 | -5.266077 |
| C  | -3.541047 | 0.550748  | 0.267033  |
| C  | -3.654353 | 1.221105  | 1.498948  |
| C  | -4.624403 | 0.595112  | -0.623284 |
| C  | -4.820779 | 1.910570  | 1.833798  |
| H  | -2.818269 | 1.205270  | 2.203734  |
| C  | -5.791341 | 1.296851  | -0.291855 |
| H  | -4.571178 | 0.078679  | -1.583158 |
| C  | -5.895043 | 1.954217  | 0.935769  |
| H  | -4.890332 | 2.422285  | 2.796983  |
| H  | -6.624198 | 1.320707  | -0.999993 |
| H  | -6.807058 | 2.498104  | 1.194335  |
| C  | 3.517956  | 0.567242  | -0.335153 |
| C  | 3.568941  | 1.239681  | -1.570145 |
| C  | 4.649382  | 0.599838  | 0.494135  |
| C  | 4.721959  | 1.918723  | -1.968448 |
| H  | 2.693588  | 1.235393  | -2.225695 |
| C  | 5.801569  | 1.293985  | 0.101099  |
| H  | 4.645091  | 0.080964  | 1.454064  |
| C  | 5.843612  | 1.952205  | -1.130263 |
| H  | 4.743109  | 2.430528  | -2.934055 |
| H  | 6.671543  | 1.311345  | 0.763349  |
| H  | 6.744689  | 2.489356  | -1.437420 |
| C  | 2.312925  | -1.101893 | 1.720171  |
| C  | 2.377869  | -0.225853 | 2.822356  |
| C  | 2.430874  | -2.482099 | 1.954111  |
| C  | 2.586464  | -0.715200 | 4.113923  |
| H  | 2.261181  | 0.850769  | 2.670498  |
| C  | 2.628793  | -2.972432 | 3.250916  |
| H  | 2.358828  | -3.189254 | 1.126506  |
| C  | 2.713925  | -2.092813 | 4.333090  |
| H  | 2.643210  | -0.017944 | 4.953969  |
| H  | 2.715301  | -4.050728 | 3.410822  |
| H  | 2.872264  | -2.477113 | 5.344050  |
| C  | 2.197574  | -1.762905 | -1.145162 |
| C  | 3.392229  | -2.508718 | -1.182945 |
| C  | 1.214612  | -2.013682 | -2.111994 |
| C  | 3.580573  | -3.498547 | -2.149636 |
| H  | 4.187865  | -2.310472 | -0.459870 |
| C  | 1.407593  | -2.999266 | -3.089565 |
| H  | 0.298384  | -1.423406 | -2.107230 |
| C  | 2.587192  | -3.745687 | -3.107771 |
| H  | 4.510903  | -4.072467 | -2.163332 |
| H  | 0.630768  | -3.175183 | -3.838320 |
| H  | 2.740021  | -4.514490 | -3.870267 |
| C  | 1.902125  | 3.778402  | 0.131955  |
| H  | 2.566238  | 3.293589  | 0.867404  |

|   |           |          |           |
|---|-----------|----------|-----------|
| H | 2.442991  | 3.689690 | -0.826276 |
| C | -1.927315 | 3.769989 | -0.149985 |
| H | -2.575972 | 3.293715 | -0.904744 |
| H | -2.483927 | 3.661410 | 0.797010  |
| C | 1.737884  | 5.260791 | 0.489427  |
| H | 2.723164  | 5.747182 | 0.576700  |
| H | 1.163613  | 5.799343 | -0.279462 |
| H | 1.212743  | 5.385619 | 1.450308  |
| C | -1.766855 | 5.259175 | -0.479986 |
| H | -1.206865 | 5.788194 | 0.305985  |
| H | -1.228726 | 5.403426 | -1.430988 |
| H | -2.753779 | 5.741195 | -0.573490 |

**Complex 14 - [Pt(PPh<sub>3</sub>)<sub>2</sub>(MeC≡CCO<sub>2</sub>Me)]**

|    |           |           |           |
|----|-----------|-----------|-----------|
| Pt | -0.177047 | 1.087363  | -0.111929 |
| P  | 1.954367  | 0.047444  | 0.071235  |
| C  | 0.123279  | 3.122197  | -0.070478 |
| C  | -1.160647 | 2.929872  | -0.214584 |
| P  | -1.614092 | -0.864594 | -0.100171 |
| C  | -1.962111 | -1.492175 | 1.612903  |
| C  | -2.692479 | -2.673943 | 1.840554  |
| C  | -1.574471 | -0.713888 | 2.714288  |
| C  | -3.012846 | -3.070602 | 3.140648  |
| H  | -3.021022 | -3.290614 | 1.000483  |
| C  | -1.905593 | -1.106190 | 4.016879  |
| H  | -1.011762 | 0.207125  | 2.545346  |
| C  | -2.621796 | -2.285525 | 4.233118  |
| H  | -3.576863 | -3.993087 | 3.301467  |
| H  | -1.598266 | -0.486206 | 4.863166  |
| H  | -2.878554 | -2.594583 | 5.249775  |
| C  | -1.036794 | -2.347840 | -1.043032 |
| C  | -1.141740 | -2.338356 | -2.447064 |
| C  | -0.426662 | -3.449846 | -0.423128 |
| C  | -0.673670 | -3.412700 | -3.206388 |
| H  | -1.600855 | -1.487197 | -2.956323 |
| C  | 0.053041  | -4.521203 | -1.186767 |
| H  | -0.323345 | -3.482484 | 0.662369  |
| C  | -0.073595 | -4.509700 | -2.578235 |
| H  | -0.774556 | -3.390141 | -4.294631 |
| H  | 0.524122  | -5.370629 | -0.685416 |
| H  | 0.295393  | -5.349646 | -3.172480 |
| C  | -3.369451 | -0.675619 | -0.699212 |
| C  | -4.020365 | 0.538975  | -0.441935 |
| C  | -4.099029 | -1.719288 | -1.299551 |
| C  | -5.364796 | 0.718284  | -0.781418 |
| H  | -3.470323 | 1.359252  | 0.011558  |
| C  | -5.444757 | -1.544405 | -1.637039 |
| H  | -3.623980 | -2.678200 | -1.511666 |
| C  | -6.081826 | -0.323292 | -1.380992 |
| H  | -5.842300 | 1.681624  | -0.584698 |
| H  | -5.995307 | -2.370465 | -2.103356 |
| H  | -7.131760 | -0.184871 | -1.651098 |
| C  | 3.371331  | 1.231652  | 0.347373  |
| C  | 3.656326  | 2.136249  | -0.692792 |
| C  | 4.184999  | 1.250686  | 1.490822  |
| C  | 4.724963  | 3.028365  | -0.592672 |
| H  | 3.037416  | 2.139581  | -1.597077 |
| C  | 5.250433  | 2.155045  | 1.595702  |
| H  | 4.007390  | 0.555189  | 2.311284  |
| C  | 5.526222  | 3.046463  | 0.556837  |
| H  | 4.925765  | 3.714923  | -1.417587 |
| H  | 5.871599  | 2.151391  | 2.497018  |
| H  | 6.359059  | 3.747408  | 0.635925  |
| C  | 2.154078  | -1.173718 | 1.448046  |
| C  | 1.888785  | -0.724605 | 2.756236  |
| C  | 2.499231  | -2.521841 | 1.259160  |
| C  | 2.003272  | -1.588461 | 3.847129  |
| H  | 1.586063  | 0.311622  | 2.925689  |
| C  | 2.597856  | -3.390787 | 2.352386  |
| H  | 2.686685  | -2.907713 | 0.256878  |
| C  | 2.360045  | -2.926300 | 3.648530  |
| H  | 1.802747  | -1.215775 | 4.854815  |
| H  | 2.864941  | -4.437117 | 2.184993  |
| H  | 2.444558  | -3.605211 | 4.500442  |
| C  | 2.601689  | -0.774014 | -1.456343 |
| C  | 3.886683  | -1.350661 | -1.494568 |
| C  | 1.849272  | -0.713376 | -2.637854 |
| C  | 4.390225  | -1.878700 | -2.684159 |
| H  | 4.505854  | -1.376267 | -0.594600 |
| C  | 2.361718  | -1.229834 | -3.834336 |
| H  | 0.862223  | -0.246717 | -2.619822 |
| C  | 3.627640  | -1.818478 | -3.858212 |
| H  | 5.386426  | -2.328784 | -2.698315 |
| H  | 1.765415  | -1.170944 | -4.748341 |
| H  | 4.027477  | -2.223863 | -4.791075 |
| C  | 1.124962  | 4.207889  | 0.047904  |
| H  | 1.815957  | 4.027020  | 0.885715  |

|   |           |          |           |
|---|-----------|----------|-----------|
| H | 1.748545  | 4.274274 | -0.857665 |
| H | 0.623680  | 5.177876 | 0.200297  |
| C | -2.341425 | 3.770709 | -0.390727 |
| O | -3.316112 | 3.528639 | -1.076182 |
| O | -2.231914 | 4.928793 | 0.310886  |
| C | -3.309315 | 5.857958 | 0.179719  |
| H | -4.252640 | 5.421728 | 0.543571  |
| H | -3.039730 | 6.729428 | 0.790674  |
| H | -3.446360 | 6.161532 | -0.870914 |

**Complex 15 - [Pt(PPh<sub>3</sub>)<sub>2</sub>(MeC≡CMe)]**

|    |           |           |           |
|----|-----------|-----------|-----------|
| Pt | 0.002995  | -1.346149 | -0.111178 |
| P  | -1.881878 | 0.110914  | 0.119168  |
| C  | -0.645360 | -3.327752 | -0.134012 |
| C  | 0.640962  | -3.324901 | -0.277513 |
| P  | 1.887110  | 0.132153  | -0.127752 |
| C  | 2.279371  | 1.004683  | 1.464615  |
| C  | 3.383861  | 1.870331  | 1.584344  |
| C  | 1.526226  | 0.707292  | 2.608723  |
| C  | 3.708425  | 2.440025  | 2.816756  |
| H  | 4.003797  | 2.094627  | 0.713014  |
| C  | 1.857543  | 1.271348  | 3.847145  |
| H  | 0.680222  | 0.022668  | 2.525648  |
| C  | 2.945031  | 2.141054  | 3.952923  |
| H  | 4.566965  | 3.112449  | 2.893999  |
| H  | 1.258593  | 1.028273  | 4.728135  |
| H  | 3.204572  | 2.582540  | 4.918707  |
| C  | 1.892753  | 1.461869  | -1.415555 |
| C  | 1.943279  | 1.079039  | -2.770273 |
| C  | 1.764179  | 2.826564  | -1.110289 |
| C  | 1.909763  | 2.036695  | -3.786378 |
| H  | 2.010042  | 0.020566  | -3.036453 |
| C  | 1.716248  | 3.784802  | -2.130230 |
| H  | 1.700372  | 3.153294  | -0.071194 |
| C  | 1.799398  | 3.395767  | -3.469286 |
| H  | 1.963946  | 1.719190  | -4.830970 |
| H  | 1.617430  | 4.842224  | -1.871104 |
| H  | 1.769866  | 4.145763  | -4.263790 |
| C  | 3.552596  | -0.684456 | -0.362575 |
| C  | 3.880964  | -1.717264 | 0.534198  |
| C  | 4.512608  | -0.290909 | -1.308416 |
| C  | 5.129943  | -2.339495 | 0.487715  |
| H  | 3.150643  | -2.033867 | 1.282749  |
| C  | 5.761563  | -0.923886 | -1.363581 |
| H  | 4.302076  | 0.519320  | -2.007081 |
| C  | 6.075432  | -1.948282 | -0.467788 |
| H  | 5.364415  | -3.136837 | 1.198025  |
| H  | 6.493321  | -0.604434 | -2.110412 |
| H  | 7.051673  | -2.438355 | -0.509914 |
| C  | -3.541201 | -0.747105 | 0.102829  |
| C  | -3.778123 | -1.645755 | -0.951893 |
| C  | -4.583866 | -0.484593 | 1.006522  |
| C  | -5.020079 | -2.266119 | -1.100146 |
| H  | -2.978241 | -1.859884 | -1.665577 |
| C  | -5.825344 | -1.117066 | 0.865992  |
| H  | -4.441577 | 0.219782  | 1.827112  |
| C  | -6.048726 | -2.008392 | -0.186053 |
| H  | -5.183051 | -2.959273 | -1.929634 |
| H  | -6.622294 | -0.903279 | 1.583683  |
| H  | -7.019104 | -2.498735 | -0.295693 |
| C  | -1.934324 | 1.103687  | 1.678561  |
| C  | -2.086441 | 0.423058  | 2.902640  |
| C  | -1.720595 | 2.491751  | 1.705973  |
| C  | -2.065525 | 1.117329  | 4.114334  |
| H  | -2.223402 | -0.661621 | 2.911538  |
| C  | -1.690997 | 3.185096  | 2.921721  |
| H  | -1.575024 | 3.044213  | 0.776157  |
| C  | -1.871607 | 2.503753  | 4.127909  |
| H  | -2.197678 | 0.571876  | 5.052426  |
| H  | -1.527081 | 4.265907  | 2.921169  |
| H  | -1.854450 | 3.047613  | 5.075736  |
| C  | -2.249789 | 1.324603  | -1.239095 |
| C  | -3.301718 | 2.255969  | -1.147396 |
| C  | -1.545466 | 1.216886  | -2.446206 |
| C  | -3.621829 | 3.073568  | -2.232926 |
| H  | -3.884941 | 2.338677  | -0.227427 |
| C  | -1.874325 | 2.028444  | -3.538971 |
| H  | -0.737540 | 0.487542  | -2.527650 |
| C  | -2.909166 | 2.960320  | -3.433706 |
| H  | -4.438315 | 3.795240  | -2.145682 |
| H  | -1.314755 | 1.930345  | -4.472272 |
| H  | -3.166005 | 3.595947  | -4.285211 |
| C  | -1.828023 | -4.221974 | -0.029221 |
| H  | -2.490310 | -3.935647 | 0.802889  |

|   |           |           |           |
|---|-----------|-----------|-----------|
| H | -2.443933 | -4.190458 | -0.942104 |
| H | -1.512667 | -5.269160 | 0.125495  |
| C | 1.819403  | -4.211596 | -0.459571 |
| H | 2.478391  | -3.862539 | -1.270075 |
| H | 2.440277  | -4.254267 | 0.449939  |
| H | 1.499368  | -5.242419 | -0.694478 |



**Complex 16 - [Pt(PPh<sub>3</sub>)<sub>2</sub>(HC≡CH)]**

|    |           |           |           |
|----|-----------|-----------|-----------|
| Pt | 0.002498  | -0.819580 | -1.254403 |
| P  | -1.894662 | -0.092834 | -0.014721 |
| C  | -0.655493 | -1.995331 | -2.837751 |
| C  | 0.631675  | -1.938276 | -2.895330 |
| H  | -1.565142 | -2.383174 | -3.292491 |
| H  | 1.523399  | -2.245281 | -3.438394 |
| P  | 1.898760  | 0.053104  | -0.107396 |
| C  | 2.369000  | -0.813092 | 1.464667  |
| C  | 3.542041  | -0.479370 | 2.168046  |
| C  | 1.577010  | -1.870966 | 1.932355  |
| C  | 3.903112  | -1.180773 | 3.319237  |
| H  | 4.183679  | 0.329979  | 1.811256  |
| C  | 1.942040  | -2.577592 | 3.084624  |
| H  | 0.671200  | -2.140347 | 1.385748  |
| C  | 3.102259  | -2.232826 | 3.781663  |
| H  | 4.815767  | -0.910020 | 3.856796  |
| H  | 1.312566  | -3.398481 | 3.437201  |
| H  | 3.388586  | -2.783944 | 4.681054  |
| C  | 1.865269  | 1.845832  | 0.350361  |
| C  | 1.903394  | 2.809606  | -0.675825 |
| C  | 1.709545  | 2.282595  | 1.676278  |
| C  | 1.825549  | 4.172046  | -0.379519 |
| H  | 1.999278  | 2.495752  | -1.718794 |
| C  | 1.615587  | 3.648350  | 1.970209  |
| H  | 1.662130  | 1.557793  | 2.490911  |
| C  | 1.682155  | 4.596974  | 0.946614  |
| H  | 1.870844  | 4.904923  | -1.189384 |
| H  | 1.495689  | 3.968631  | 3.008625  |
| H  | 1.617360  | 5.663044  | 1.178426  |
| C  | 3.511652  | -0.120296 | -1.028633 |
| C  | 3.786504  | -1.373646 | -1.607143 |
| C  | 4.485155  | 0.888303  | -1.123115 |
| C  | 4.996027  | -1.610420 | -2.264160 |
| H  | 3.044619  | -2.171873 | -1.537607 |
| C  | 5.692941  | 0.653762  | -1.791950 |
| H  | 4.313354  | 1.867500  | -0.673710 |
| C  | 5.952990  | -0.593739 | -2.364941 |
| H  | 5.190326  | -2.593069 | -2.702670 |
| H  | 6.434917  | 1.454138  | -1.858846 |
| H  | 6.896558  | -0.774821 | -2.885952 |
| C  | -3.522137 | -0.738506 | -0.660369 |
| C  | -3.727422 | -0.696944 | -2.051157 |
| C  | -4.573740 | -1.180096 | 0.159941  |
| C  | -4.947737 | -1.089385 | -2.607322 |
| H  | -2.922416 | -0.351242 | -2.702805 |
| C  | -5.792314 | -1.584080 | -0.398783 |
| H  | -4.453349 | -1.212955 | 1.243818  |
| C  | -5.983811 | -1.540880 | -1.782252 |
| H  | -5.087648 | -1.046499 | -3.690664 |
| H  | -6.596390 | -1.930192 | 0.256073  |
| H  | -6.936114 | -1.856002 | -2.216569 |
| C  | -1.904787 | -0.605549 | 1.761479  |
| C  | -2.053324 | -1.971536 | 2.070409  |
| C  | -1.657200 | 0.296817  | 2.809163  |
| C  | -1.991538 | -2.415850 | 3.393257  |
| H  | -2.221033 | -2.697306 | 1.270346  |
| C  | -1.584679 | -0.151798 | 4.133382  |
| H  | -1.518845 | 1.358967  | 2.599024  |
| C  | -1.759349 | -1.505838 | 4.431204  |
| H  | -2.121764 | -3.478696 | 3.613282  |
| H  | -1.393689 | 0.565941  | 4.935467  |
| H  | -1.709463 | -1.853000 | 5.466372  |
| C  | -2.308682 | 1.715188  | 0.004302  |
| C  | -3.382748 | 2.226291  | 0.757208  |
| C  | -1.599024 | 2.581100  | -0.839484 |
| C  | -3.724716 | 3.577338  | 0.676812  |
| H  | -3.962413 | 1.566631  | 1.407070  |
| C  | -1.948638 | 3.934122  | -0.927194 |
| H  | -0.771066 | 2.187833  | -1.432764 |
| C  | -3.008524 | 4.434988  | -0.168186 |
| H  | -4.558317 | 3.962223  | 1.270006  |
| H  | -1.385919 | 4.596215  | -1.589748 |
| H  | -3.281300 | 5.491419  | -0.234425 |

**Complex 17 - [Pt(PPh<sub>3</sub>)<sub>2</sub>(EtO<sub>2</sub>CC≡CCO<sub>2</sub>Et)]**

|    |              |              |              |
|----|--------------|--------------|--------------|
| Pt | -0.559798000 | 0.121568000  | -0.052848000 |
| P  | 1.244927000  | 1.690121000  | 0.088401000  |
| C  | -2.400447000 | 1.052530000  | 0.031013000  |
| C  | -2.588579000 | -0.214499000 | -0.228676000 |
| P  | 0.635253000  | -1.955652000 | -0.077911000 |
| C  | 1.273429000  | -2.450659000 | 1.589946000  |
| C  | 1.902399000  | -3.695493000 | 1.786971000  |
| C  | 1.038891000  | -1.625617000 | 2.699142000  |
| C  | 2.304184000  | -4.091871000 | 3.063263000  |
| H  | 2.071163000  | -4.365748000 | 0.940784000  |
| C  | 1.431675000  | -2.029721000 | 3.981113000  |
| H  | 0.539024000  | -0.665988000 | 2.555321000  |
| C  | 2.067397000  | -3.259588000 | 4.165056000  |
| H  | 2.795016000  | -5.058996000 | 3.201276000  |
| H  | 1.238246000  | -1.377299000 | 4.836101000  |
| H  | 2.374214000  | -3.575254000 | 5.165677000  |
| C  | 2.070691000  | -2.128624000 | -1.226887000 |
| C  | 1.827227000  | -2.044725000 | -2.610696000 |
| C  | 3.395397000  | -2.276910000 | -0.784188000 |
| C  | 2.875756000  | -2.145070000 | -3.527204000 |
| H  | 0.808658000  | -1.897636000 | -2.978944000 |
| C  | 4.447222000  | -2.358866000 | -1.704304000 |
| H  | 3.616576000  | -2.328583000 | 0.282470000  |
| C  | 4.190830000  | -2.302187000 | -3.076496000 |
| H  | 2.664902000  | -2.087138000 | -4.597910000 |
| H  | 5.471867000  | -2.472721000 | -1.341257000 |
| H  | 5.012851000  | -2.372751000 | -3.793140000 |
| C  | -0.396473000 | -3.466047000 | -0.434111000 |
| C  | -1.480156000 | -3.712190000 | 0.428278000  |
| C  | -0.127513000 | -4.387719000 | -1.457426000 |
| C  | -2.271582000 | -4.850632000 | 0.273945000  |
| H  | -1.707749000 | -3.007606000 | 1.232692000  |
| C  | -0.932737000 | -5.522798000 | -1.621044000 |
| H  | 0.714943000  | -4.238730000 | -2.133803000 |
| C  | -2.004017000 | -5.759726000 | -0.756672000 |
| H  | -3.106322000 | -5.025686000 | 0.958174000  |
| H  | -0.709798000 | -6.225386000 | -2.428746000 |
| H  | -2.631367000 | -6.646520000 | -0.881870000 |
| C  | 0.781586000  | 3.489810000  | 0.212477000  |
| C  | -0.279455000 | 3.942713000  | -0.587866000 |
| C  | 1.518098000  | 4.430660000  | 0.952612000  |
| C  | -0.597873000 | 5.301961000  | -0.651162000 |
| H  | -0.862657000 | 3.223514000  | -1.166004000 |
| C  | 1.193324000  | 5.790154000  | 0.893917000  |
| H  | 2.360506000  | 4.113160000  | 1.568913000  |
| C  | 0.137029000  | 6.231047000  | 0.091762000  |
| H  | -1.426781000 | 5.634932000  | -1.281537000 |
| H  | 1.778573000  | 6.506793000  | 1.475374000  |
| H  | -0.111352000 | 7.295039000  | 0.043936000  |
| C  | 2.449056000  | 1.452501000  | 1.467081000  |
| C  | 2.051228000  | 1.787155000  | 2.775874000  |
| C  | 3.706445000  | 0.856516000  | 1.276633000  |
| C  | 2.904870000  | 1.564238000  | 3.858654000  |
| H  | 1.068098000  | 2.230814000  | 2.953314000  |
| C  | 4.556830000  | 0.627019000  | 2.364686000  |
| H  | 4.033334000  | 0.567782000  | 0.276261000  |
| C  | 4.163483000  | 0.986195000  | 3.656230000  |
| H  | 2.583348000  | 1.841113000  | 4.865964000  |
| H  | 5.534711000  | 0.168657000  | 2.195854000  |
| H  | 4.831951000  | 0.813317000  | 4.503385000  |
| C  | 2.254021000  | 1.817999000  | -1.462826000 |
| C  | 3.454867000  | 2.550199000  | -1.516959000 |
| C  | 1.722587000  | 1.299413000  | -2.652394000 |
| C  | 4.117253000  | 2.734744000  | -2.732150000 |
| H  | 3.874745000  | 2.989399000  | -0.609598000 |
| C  | 2.378639000  | 1.499256000  | -3.872502000 |
| H  | 0.785361000  | 0.740035000  | -2.618046000 |
| C  | 3.579223000  | 2.211059000  | -3.914396000 |
| H  | 5.053045000  | 3.298909000  | -2.758424000 |
| H  | 1.949649000  | 1.090305000  | -4.790644000 |
| H  | 4.095515000  | 2.362598000  | -4.865818000 |
| C  | -3.652248000 | -1.168154000 | -0.566731000 |
| C  | -3.157734000 | 2.257129000  | 0.392759000  |

|   |              |              |              |
|---|--------------|--------------|--------------|
| O | -3.531488000 | -2.065077000 | -1.375916000 |
| O | -2.781691000 | 3.078420000  | 1.206441000  |
| O | -4.792352000 | -0.927196000 | 0.107924000  |
| O | -4.335431000 | 2.331132000  | -0.254619000 |
| C | -5.911491000 | -1.796557000 | -0.163991000 |
| H | -5.739237000 | -2.754702000 | 0.355020000  |
| H | -5.941642000 | -2.008109000 | -1.242954000 |
| C | -5.226798000 | 3.418000000  | 0.072463000  |
| H | -5.053250000 | 4.226710000  | -0.656711000 |
| H | -4.969535000 | 3.802764000  | 1.068834000  |
| C | -7.180081000 | -1.120569000 | 0.313296000  |
| H | -8.039970000 | -1.786784000 | 0.141779000  |
| H | -7.136399000 | -0.888658000 | 1.388813000  |
| H | -7.355981000 | -0.184463000 | -0.237725000 |
| C | -6.654579000 | 2.915230000  | 0.012358000  |
| H | -7.346602000 | 3.743035000  | 0.231818000  |
| H | -6.897577000 | 2.517468000  | -0.984954000 |
| H | -6.822063000 | 2.121017000  | 0.755417000  |

**Complex 18 - [Pt(PPh<sub>3</sub>)<sub>2</sub>(MeO<sub>2</sub>CC≡CCO<sub>2</sub>Me)]**

|    |           |           |           |
|----|-----------|-----------|-----------|
| Pt | 0.002742  | 0.691717  | -0.087869 |
| P  | 1.855538  | -0.794028 | 0.075887  |
| C  | 0.831557  | 2.576745  | -0.035071 |
| C  | -0.451800 | 2.712357  | -0.223701 |
| P  | -2.004116 | -0.592232 | -0.077550 |
| C  | -2.317768 | -1.569402 | 1.464247  |
| C  | -3.514077 | -2.289430 | 1.648884  |
| C  | -1.394459 | -1.505454 | 2.517190  |
| C  | -3.763982 | -2.948549 | 2.853705  |
| H  | -4.261139 | -2.329850 | 0.852720  |
| C  | -1.650520 | -2.158884 | 3.729257  |
| H  | -0.476074 | -0.931104 | 2.387862  |
| C  | -2.831846 | -2.883938 | 3.897957  |
| H  | -4.694229 | -3.507817 | 2.982471  |
| H  | -0.920117 | -2.096158 | 4.539408  |
| H  | -3.032885 | -3.394093 | 4.843565  |
| C  | -2.280979 | -1.762419 | -1.478660 |
| C  | -2.353686 | -1.226876 | -2.779467 |
| C  | -2.342074 | -3.155319 | -1.316334 |
| C  | -2.518104 | -2.064447 | -3.885013 |
| H  | -2.281952 | -0.146270 | -2.931086 |
| C  | -2.497654 | -3.993373 | -2.426825 |
| H  | -2.264878 | -3.598119 | -0.322143 |
| C  | -2.594011 | -3.452092 | -3.711104 |
| H  | -2.583632 | -1.631914 | -4.886636 |
| H  | -2.542713 | -5.075886 | -2.282078 |
| H  | -2.721319 | -4.107844 | -4.576136 |
| C  | -3.552306 | 0.443932  | -0.068922 |
| C  | -3.614928 | 1.506630  | 0.849408  |
| C  | -4.678441 | 0.169678  | -0.860518 |
| C  | -4.775172 | 2.272588  | 0.976143  |
| H  | -2.746406 | 1.740030  | 1.470243  |
| C  | -5.837380 | 0.946750  | -0.741596 |
| H  | -4.664978 | -0.654132 | -1.575326 |
| C  | -5.890981 | 1.997363  | 0.177161  |
| H  | -4.805561 | 3.092842  | 1.698086  |
| H  | -6.702903 | 0.721717  | -1.370248 |
| H  | -6.796933 | 2.601405  | 0.271391  |
| C  | 3.449850  | 0.041942  | -0.398978 |
| C  | 3.452503  | 0.859659  | -1.542391 |
| C  | 4.661689  | -0.185928 | 0.272698  |
| C  | 4.639046  | 1.439074  | -2.000856 |
| H  | 2.518596  | 1.051982  | -2.077026 |
| C  | 5.847307  | 0.401939  | -0.182442 |
| H  | 4.691454  | -0.821699 | 1.158978  |
| C  | 5.840534  | 1.214920  | -1.319275 |
| H  | 4.622673  | 2.073265  | -2.891261 |
| H  | 6.780457  | 0.218357  | 0.356720  |
| H  | 6.767937  | 1.672359  | -1.673682 |
| C  | 2.167033  | -1.400663 | 1.789224  |
| C  | 2.499239  | -0.449584 | 2.774584  |
| C  | 1.972022  | -2.736876 | 2.173192  |
| C  | 2.664100  | -0.838950 | 4.105778  |
| H  | 2.629086  | 0.600904  | 2.498959  |
| C  | 2.133823  | -3.121809 | 3.509017  |
| H  | 1.685028  | -3.487082 | 1.434697  |
| C  | 2.485767  | -2.177669 | 4.476800  |
| H  | 2.930317  | -0.092101 | 4.857977  |
| H  | 1.980514  | -4.166783 | 3.790339  |
| H  | 2.615101  | -2.481147 | 5.518711  |
| C  | 1.990390  | -2.266985 | -1.039648 |
| C  | 3.010628  | -3.226647 | -0.895309 |
| C  | 1.138642  | -2.343811 | -2.150582 |
| C  | 3.152758  | -4.253383 | -1.830920 |
| H  | 3.707230  | -3.171423 | -0.055930 |
| C  | 1.291965  | -3.364823 | -3.096326 |
| H  | 0.357370  | -1.593927 | -2.280622 |
| C  | 2.293832  | -4.324221 | -2.935220 |
| H  | 3.944670  | -4.995967 | -1.703464 |
| H  | 0.620802  | -3.406210 | -3.957296 |
| H  | 2.412048  | -5.124199 | -3.670746 |
| C  | 2.059529  | 3.332961  | 0.215776  |
| C  | -1.462749 | 3.738340  | -0.488214 |

|   |           |          |           |
|---|-----------|----------|-----------|
| O | 2.778973  | 3.170072 | 1.179856  |
| O | -2.244988 | 3.714741 | -1.415256 |
| O | 2.301448  | 4.244909 | -0.741390 |
| O | -1.418258 | 4.736371 | 0.415337  |
| C | 3.473501  | 5.051356 | -0.575657 |
| H | 4.382543  | 4.435055 | -0.651457 |
| H | 3.449093  | 5.790173 | -1.385382 |
| H | 3.465042  | 5.557440 | 0.400851  |
| C | -2.343884 | 5.812303 | 0.224788  |
| H | -3.374900 | 5.472779 | 0.407400  |
| H | -2.069497 | 6.586084 | 0.952720  |
| H | -2.275967 | 6.208533 | -0.798925 |

**Complex 19 - [Pt(PPh<sub>3</sub>)<sub>2</sub>(F<sub>3</sub>CC≡CCF<sub>3</sub>)]**

|    |           |           |           |
|----|-----------|-----------|-----------|
| Pt | 0.007658  | 0.873366  | -0.004634 |
| P  | 1.822728  | -0.674360 | 0.093136  |
| C  | 0.697748  | 2.814959  | 0.092584  |
| C  | -0.589030 | 2.850908  | -0.102858 |
| P  | -1.859854 | -0.621225 | -0.090280 |
| C  | -2.198053 | -1.569272 | 1.463376  |
| C  | -3.215127 | -2.541332 | 1.523868  |
| C  | -1.522118 | -1.218932 | 2.640493  |
| C  | -3.527499 | -3.163724 | 2.733507  |
| H  | -3.776318 | -2.809599 | 0.626000  |
| C  | -1.844490 | -1.835829 | 3.855120  |
| H  | -0.743253 | -0.454943 | 2.605447  |
| C  | -2.842474 | -2.811608 | 3.903281  |
| H  | -4.316064 | -3.920109 | 2.765587  |
| H  | -1.307970 | -1.551895 | 4.763472  |
| H  | -3.093095 | -3.295104 | 4.850923  |
| C  | -1.835589 | -1.865205 | -1.452832 |
| C  | -2.011420 | -1.413961 | -2.775265 |
| C  | -1.571938 | -3.227046 | -1.233101 |
| C  | -1.965604 | -2.310237 | -3.845074 |
| H  | -2.189015 | -0.353465 | -2.973939 |
| C  | -1.515202 | -4.121698 | -2.308468 |
| H  | -1.410872 | -3.600673 | -0.220337 |
| C  | -1.720852 | -3.669188 | -3.614390 |
| H  | -2.117295 | -1.944101 | -4.863867 |
| H  | -1.312758 | -5.179182 | -2.118895 |
| H  | -1.684303 | -4.370777 | -4.451583 |
| C  | -3.525996 | 0.191852  | -0.267622 |
| C  | -3.802072 | 1.280598  | 0.575476  |
| C  | -4.544846 | -0.285276 | -1.108805 |
| C  | -5.058848 | 1.887919  | 0.571339  |
| H  | -3.025484 | 1.665967  | 1.238314  |
| C  | -5.802707 | 0.328653  | -1.117314 |
| H  | -4.371176 | -1.140433 | -1.762760 |
| C  | -6.064064 | 1.415915  | -0.279517 |
| H  | -5.247464 | 2.740093  | 1.228900  |
| H  | -6.581534 | -0.051363 | -1.783746 |
| H  | -7.046503 | 1.894343  | -0.289444 |
| C  | 3.510802  | 0.098524  | 0.247376  |
| C  | 3.830880  | 1.117400  | -0.664627 |
| C  | 4.503041  | -0.347651 | 1.134593  |
| C  | 5.104918  | 1.686785  | -0.683525 |
| H  | 3.074470  | 1.478038  | -1.363889 |
| C  | 5.779078  | 0.228930  | 1.119671  |
| H  | 4.295648  | -1.150818 | 1.841666  |
| C  | 6.084778  | 1.245541  | 0.212278  |
| H  | 5.328997  | 2.483905  | -1.396040 |
| H  | 6.537506  | -0.126585 | 1.821786  |
| H  | 7.081878  | 1.693123  | 0.202417  |
| C  | 1.771893  | -1.899520 | 1.471170  |
| C  | 1.933503  | -1.429507 | 2.788614  |
| C  | 1.504693  | -3.263157 | 1.268909  |
| C  | 1.871101  | -2.309225 | 3.871253  |
| H  | 2.112597  | -0.366919 | 2.973237  |
| C  | 1.429938  | -4.140922 | 2.357151  |
| H  | 1.354361  | -3.651885 | 0.260370  |
| C  | 1.622043  | -3.669994 | 3.658393  |
| H  | 2.012361  | -1.928441 | 4.885973  |
| H  | 1.224116  | -5.199936 | 2.181245  |
| H  | 1.571549  | -4.358605 | 4.505602  |
| C  | 2.130996  | -1.643864 | -1.452215 |
| C  | 3.136872  | -2.627160 | -1.514714 |
| C  | 1.447585  | -1.294029 | -2.624930 |
| C  | 3.430439  | -3.261319 | -2.723111 |
| H  | 3.705005  | -2.892847 | -0.620269 |
| C  | 1.751419  | -1.922378 | -3.838551 |
| H  | 0.678872  | -0.520164 | -2.584340 |
| C  | 2.738265  | -2.909201 | -3.889110 |
| H  | 4.210585  | -4.026079 | -2.757788 |
| H  | 1.209893  | -1.638658 | -4.744050 |
| H  | 2.974974  | -3.401571 | -4.835937 |
| C  | 1.813107  | 3.772849  | 0.270664  |
| C  | -1.645019 | 3.876299  | -0.264388 |

|   |           |          |           |
|---|-----------|----------|-----------|
| F | -1.147462 | 5.080393 | -0.615664 |
| F | -2.337479 | 4.067070 | 0.882077  |
| F | 1.389086  | 4.990952 | 0.669537  |
| F | 2.499212  | 3.962253 | -0.879675 |
| F | 2.700877  | 3.357769 | 1.195174  |
| F | -2.541015 | 3.543175 | -1.213408 |

**Complex 20 - [Pt(PPh<sub>3</sub>)<sub>2</sub>(PhC≡CCN)]**

|    |           |           |           |
|----|-----------|-----------|-----------|
| Pt | 0.290800  | 0.862191  | -0.180400 |
| P  | 1.169214  | -1.320154 | -0.009479 |
| C  | 1.758246  | 2.310185  | -0.151641 |
| C  | 0.606750  | 2.913241  | -0.361561 |
| P  | -2.091126 | 0.423854  | -0.058621 |
| C  | -2.693072 | 0.818002  | 1.647723  |
| C  | -4.031399 | 1.173975  | 1.896375  |
| C  | -1.798124 | 0.742765  | 2.727086  |
| C  | -4.462195 | 1.445215  | 3.197788  |
| H  | -4.743375 | 1.242666  | 1.071193  |
| C  | -2.231871 | 1.012650  | 4.029817  |
| H  | -0.755389 | 0.474058  | 2.543325  |
| C  | -3.563591 | 1.364765  | 4.267660  |
| H  | -5.504311 | 1.722075  | 3.376518  |
| H  | -1.523197 | 0.950261  | 4.859209  |
| H  | -3.901877 | 1.580087  | 5.284591  |
| C  | -2.815133 | -1.249735 | -0.391687 |
| C  | -2.609923 | -1.834673 | -1.655133 |
| C  | -3.555045 | -1.963784 | 0.566111  |
| C  | -3.143447 | -3.089923 | -1.959368 |
| H  | -2.034256 | -1.306317 | -2.416497 |
| C  | -4.080186 | -3.225771 | 0.264034  |
| H  | -3.726720 | -1.542231 | 1.557390  |
| C  | -3.879681 | -3.791640 | -0.998308 |
| H  | -2.977787 | -3.520917 | -2.950094 |
| H  | -4.651670 | -3.766393 | 1.023185  |
| H  | -4.294550 | -4.775306 | -1.233739 |
| C  | -3.142831 | 1.547138  | -1.103307 |
| C  | -3.007891 | 2.931940  | -0.895685 |
| C  | -4.050724 | 1.099275  | -2.076478 |
| C  | -3.753014 | 3.845022  | -1.643785 |
| H  | -2.318709 | 3.306264  | -0.138156 |
| C  | -4.793778 | 2.016674  | -2.830929 |
| H  | -4.194699 | 0.032825  | -2.252657 |
| C  | -4.647801 | 3.389988  | -2.619337 |
| H  | -3.625403 | 4.915659  | -1.464910 |
| H  | -5.494243 | 1.648420  | -3.585202 |
| H  | -5.229399 | 4.103581  | -3.208975 |
| C  | 3.022963  | -1.478476 | 0.031094  |
| C  | 3.756359  | -0.720252 | -0.895774 |
| C  | 3.705670  | -2.401127 | 0.840266  |
| C  | 5.138935  | -0.878377 | -1.013987 |
| H  | 3.241842  | 0.001282  | -1.530650 |
| C  | 5.092523  | -2.552465 | 0.729486  |
| H  | 3.162993  | -3.016033 | 1.559414  |
| C  | 5.812973  | -1.792553 | -0.197786 |
| H  | 5.691454  | -0.278951 | -1.739823 |
| H  | 5.608881  | -3.276479 | 1.368766  |
| H  | 6.895425  | -1.914083 | -0.284685 |
| C  | 0.605029  | -2.228575 | 1.491814  |
| C  | 1.095895  | -1.801273 | 2.741471  |
| C  | -0.371169 | -3.236937 | 1.460403  |
| C  | 0.644998  | -2.390206 | 3.924024  |
| H  | 1.839108  | -1.001662 | 2.794415  |
| C  | -0.825611 | -3.821593 | 2.648511  |
| H  | -0.794298 | -3.568310 | 0.511864  |
| C  | -0.317079 | -3.406226 | 3.880818  |
| H  | 1.044630  | -2.051749 | 4.883002  |
| H  | -1.586080 | -4.605080 | 2.604172  |
| H  | -0.671611 | -3.867068 | 4.805945  |
| C  | 0.875130  | -2.408478 | -1.479100 |
| C  | 1.082641  | -3.798908 | -1.451722 |
| C  | 0.587759  | -1.788429 | -2.705441 |
| C  | 0.969605  | -4.553317 | -2.622490 |
| H  | 1.344372  | -4.301987 | -0.518603 |
| C  | 0.491084  | -2.542372 | -3.879615 |
| H  | 0.442091  | -0.705287 | -2.734365 |
| C  | 0.673181  | -3.927536 | -3.838962 |
| H  | 1.124190  | -5.634625 | -2.585943 |
| H  | 0.269809  | -2.044088 | -4.826753 |
| H  | 0.592569  | -4.519223 | -4.754287 |
| C  | 3.158597  | 2.658855  | 0.038835  |
| C  | 3.955294  | 1.993077  | 0.991305  |

|   |           |          |           |
|---|-----------|----------|-----------|
| C | 3.735234  | 3.713857 | -0.703382 |
| C | 5.278572  | 2.380996 | 1.209125  |
| H | 3.520503  | 1.173760 | 1.566756  |
| C | 5.064069  | 4.085560 | -0.495771 |
| H | 3.130378  | 4.236812 | -1.448615 |
| C | 5.839684  | 3.423856 | 0.464181  |
| H | 5.877996  | 1.861063 | 1.960527  |
| H | 5.495852  | 4.900686 | -1.081867 |
| H | 6.878644  | 3.720259 | 0.629667  |
| C | 0.085762  | 4.199405 | -0.486566 |
| N | -0.366742 | 5.273819 | -0.584582 |

**Complex 21** - [Pt(PPh<sub>3</sub>)<sub>2</sub>(F<sub>3</sub>CH<sub>2</sub>CO<sub>2</sub>CC≡CCO<sub>2</sub>CH<sub>2</sub>CF<sub>3</sub>)]

|    |              |              |              |   |             |              |              |
|----|--------------|--------------|--------------|---|-------------|--------------|--------------|
| Pt | -0.313675000 | -0.008180000 | -0.058883000 | O | 2.241879000 | -2.773812000 | 0.994234000  |
| P  | -1.716139000 | -1.924654000 | 0.060818000  | O | 2.469866000 | 2.391481000  | -1.465463000 |
| C  | 1.612871000  | -0.744716000 | -0.050772000 | O | 3.551356000 | -1.918534000 | -0.642065000 |
| C  | 1.667548000  | 0.548077000  | -0.223016000 | O | 3.551829000 | 1.771529000  | 0.425643000  |
| P  | -1.581973000 | 2.004120000  | -0.035845000 | C | 4.512620000 | -2.944900000 | -0.445834000 |
| C  | -2.909881000 | 2.199626000  | 1.238543000  | H | 4.581405000 | -3.564332000 | -1.353101000 |
| C  | -3.579295000 | 3.423602000  | 1.428872000  | H | 4.241015000 | -3.573770000 | 0.411286000  |
| C  | -3.189569000 | 1.132572000  | 2.103446000  | C | 4.529953000 | 2.785123000  | 0.239868000  |
| C  | -4.521845000 | 3.561987000  | 2.450002000  | H | 4.479957000 | 3.502216000  | 1.073363000  |
| H  | -3.359363000 | 4.278810000  | 0.785584000  | H | 4.369581000 | 3.311614000  | -0.711194000 |
| C  | -4.128089000 | 1.274414000  | 3.132197000  | C | 5.864877000 | -2.305167000 | -0.183926000 |
| H  | -2.654441000 | 0.190664000  | 1.982039000  | C | 5.905378000 | 2.142969000  | 0.226292000  |
| C  | -4.797836000 | 2.487486000  | 3.305271000  | F | 6.842345000 | 3.091393000  | 0.046221000  |
| H  | -5.036272000 | 4.516427000  | 2.586205000  | F | 6.021746000 | 1.248688000  | -0.770016000 |
| H  | -4.325846000 | 0.433006000  | 3.800951000  | F | 6.774256000 | -3.261169000 | 0.073372000  |
| H  | -5.527945000 | 2.601765000  | 4.110749000  | F | 6.304967000 | -1.603912000 | -1.238676000 |
| C  | -2.336734000 | 2.485083000  | -1.651368000 | F | 5.827156000 | -1.476280000 | 0.871138000  |
| C  | -1.485712000 | 2.549093000  | -2.772369000 | F | 6.181081000 | 1.509659000  | 1.379188000  |
| C  | -3.712160000 | 2.703523000  | -1.829912000 |   |             |              |              |
| C  | -2.000458000 | 2.844327000  | -4.036554000 |   |             |              |              |
| H  | -0.413490000 | 2.368709000  | -2.655230000 |   |             |              |              |
| C  | -4.225919000 | 2.989635000  | -3.100786000 |   |             |              |              |
| H  | -4.395114000 | 2.640873000  | -0.981389000 |   |             |              |              |
| C  | -3.373346000 | 3.063919000  | -4.205028000 |   |             |              |              |
| H  | -1.327081000 | 2.897249000  | -4.895620000 |   |             |              |              |
| H  | -5.299771000 | 3.154160000  | -3.222699000 |   |             |              |              |
| H  | -3.776445000 | 3.288209000  | -5.195813000 |   |             |              |              |
| C  | -0.510816000 | 3.458411000  | 0.402358000  |   |             |              |              |
| C  | 0.330693000  | 3.333556000  | 1.522767000  |   |             |              |              |
| C  | -0.540663000 | 4.678154000  | -0.291201000 |   |             |              |              |
| C  | 1.120097000  | 4.406552000  | 1.942263000  |   |             |              |              |
| H  | 0.373280000  | 2.387465000  | 2.068849000  |   |             |              |              |
| C  | 0.258600000  | 5.749778000  | 0.125468000  |   |             |              |              |
| H  | -1.184739000 | 4.802956000  | -1.163707000 |   |             |              |              |
| C  | 1.088285000  | 5.618815000  | 1.241924000  |   |             |              |              |
| H  | 1.765220000  | 4.294034000  | 2.817689000  |   |             |              |              |
| H  | 0.227446000  | 6.691526000  | -0.428862000 |   |             |              |              |
| H  | 1.708640000  | 6.457876000  | 1.567391000  |   |             |              |              |
| C  | -0.881645000 | -3.379477000 | -0.740649000 |   |             |              |              |
| C  | -0.203886000 | -3.162674000 | -1.952531000 |   |             |              |              |
| C  | -0.959836000 | -4.685082000 | -0.228273000 |   |             |              |              |
| C  | 0.379118000  | -4.230505000 | -2.640068000 |   |             |              |              |
| H  | -0.128780000 | -2.150029000 | -2.359588000 |   |             |              |              |
| C  | -0.368053000 | -5.750442000 | -0.914421000 |   |             |              |              |
| H  | -1.479409000 | -4.877149000 | 0.711735000  |   |             |              |              |
| C  | 0.301380000  | -5.527805000 | -2.120787000 |   |             |              |              |
| H  | 0.902896000  | -4.047475000 | -3.582098000 |   |             |              |              |
| H  | -0.434033000 | -6.759319000 | -0.500867000 |   |             |              |              |
| H  | 0.762227000  | -6.362108000 | -2.656023000 |   |             |              |              |
| C  | -2.052695000 | -2.488626000 | 1.786805000  |   |             |              |              |
| C  | -0.947041000 | -2.822085000 | 2.594339000  |   |             |              |              |
| C  | -3.337110000 | -2.504179000 | 2.353850000  |   |             |              |              |
| C  | -1.132629000 | -3.185336000 | 3.930336000  |   |             |              |              |
| H  | 0.063938000  | -2.800021000 | 2.176351000  |   |             |              |              |
| C  | -3.516591000 | -2.860847000 | 3.696112000  |   |             |              |              |
| H  | -4.207572000 | -2.232103000 | 1.755355000  |   |             |              |              |
| C  | -2.417678000 | -3.206880000 | 4.485212000  |   |             |              |              |
| H  | -0.267104000 | -3.450083000 | 4.542649000  |   |             |              |              |
| H  | -4.524188000 | -2.869296000 | 4.119940000  |   |             |              |              |
| H  | -2.559332000 | -3.489812000 | 5.531836000  |   |             |              |              |
| C  | -3.341832000 | -1.984409000 | -0.824542000 |   |             |              |              |
| C  | -4.177573000 | -3.117464000 | -0.772187000 |   |             |              |              |
| C  | -3.699024000 | -0.920067000 | -1.662087000 |   |             |              |              |
| C  | -5.352810000 | -3.164360000 | -1.525035000 |   |             |              |              |
| H  | -3.912022000 | -3.973218000 | -0.147979000 |   |             |              |              |
| C  | -4.871860000 | -0.971786000 | -2.424877000 |   |             |              |              |
| H  | -3.047324000 | -0.049305000 | -1.728857000 |   |             |              |              |
| C  | -5.703117000 | -2.091482000 | -2.354793000 |   |             |              |              |
| H  | -5.995000000 | -4.046958000 | -1.470378000 |   |             |              |              |
| H  | -5.128711000 | -0.132425000 | -3.075569000 |   |             |              |              |
| H  | -6.619717000 | -2.133995000 | -2.949330000 |   |             |              |              |
| C  | 2.573332000  | 1.654462000  | -0.511757000 |   |             |              |              |
| C  | 2.461449000  | -1.909682000 | 0.174317000  |   |             |              |              |

**Complex 22 - [Pt(PPh<sub>3</sub>)<sub>2</sub>(MeC≡CCN)]**

|    |           |           |           |
|----|-----------|-----------|-----------|
| Pt | -0.012805 | 1.329085  | 0.104293  |
| P  | 1.831204  | -0.247109 | 0.120093  |
| C  | 0.624052  | 3.318243  | 0.224401  |
| C  | -0.677730 | 3.271739  | 0.078680  |
| P  | -1.868232 | -0.116980 | -0.103311 |
| C  | -2.298212 | -1.126914 | 1.386078  |
| C  | -3.382506 | -2.025054 | 1.386787  |
| C  | -1.607743 | -0.893369 | 2.582343  |
| C  | -3.746740 | -2.691235 | 2.558176  |
| H  | -3.954805 | -2.198590 | 0.473002  |
| C  | -1.983048 | -1.551265 | 3.759954  |
| H  | -0.778185 | -0.183754 | 2.583934  |
| C  | -3.048042 | -2.453954 | 3.748628  |
| H  | -4.586602 | -3.390485 | 2.545804  |
| H  | -1.437270 | -1.356678 | 4.685676  |
| H  | -3.341044 | -2.969635 | 4.666895  |
| C  | -1.796321 | -1.290465 | -1.527019 |
| C  | -1.754371 | -0.752014 | -2.827716 |
| C  | -1.709311 | -2.683626 | -1.371714 |
| C  | -1.666542 | -1.586968 | -3.943307 |
| H  | -1.790572 | 0.330863  | -2.972816 |
| C  | -1.605117 | -3.517902 | -2.491178 |
| H  | -1.719931 | -3.128632 | -0.376001 |
| C  | -1.592292 | -2.974709 | -3.778266 |
| H  | -1.646995 | -1.150970 | -4.945231 |
| H  | -1.538272 | -4.599920 | -2.351394 |
| H  | -1.518114 | -3.628619 | -4.650679 |
| C  | -3.508667 | 0.743321  | -0.317683 |
| C  | -3.898392 | 1.624629  | 0.707785  |
| C  | -4.393901 | 0.519770  | -1.384036 |
| C  | -5.137494 | 2.264779  | 0.668937  |
| H  | -3.227043 | 1.808663  | 1.550759  |
| C  | -5.633138 | 1.171626  | -1.427753 |
| H  | -4.133568 | -0.170332 | -2.187391 |
| C  | -6.009694 | 2.043836  | -0.404054 |
| H  | -5.421915 | 2.942344  | 1.478436  |
| H  | -6.307694 | 0.986490  | -2.268099 |
| H  | -6.978705 | 2.547511  | -0.438105 |
| C  | 3.492668  | 0.440915  | 0.608233  |
| C  | 3.849689  | 1.693110  | 0.080334  |
| C  | 4.437174  | -0.258414 | 1.379548  |
| C  | 5.112992  | 2.239203  | 0.320489  |
| H  | 3.134079  | 2.247694  | -0.527644 |
| C  | 5.700167  | 0.292391  | 1.625413  |
| H  | 4.199519  | -1.239521 | 1.793430  |
| C  | 6.042471  | 1.541408  | 1.098186  |
| H  | 5.362336  | 3.219084  | -0.094403 |
| H  | 6.420172  | -0.263404 | 2.231860  |
| H  | 7.029306  | 1.969411  | 1.292879  |
| C  | 1.654991  | -1.733982 | 1.204080  |
| C  | 1.752367  | -1.570944 | 2.598814  |
| C  | 1.343404  | -3.005626 | 0.696128  |
| C  | 1.577145  | -2.657094 | 3.458565  |
| H  | 1.973422  | -0.587909 | 3.022147  |
| C  | 1.154899  | -4.090398 | 1.560487  |
| H  | 1.248285  | -3.160721 | -0.379497 |
| C  | 1.279266  | -3.922728 | 2.941790  |
| H  | 1.668652  | -2.511807 | 4.537847  |
| H  | 0.915593  | -5.073117 | 1.146347  |
| H  | 1.140026  | -4.772524 | 3.614482  |
| C  | 2.286986  | -0.909063 | -1.551412 |
| C  | 3.293972  | -1.880009 | -1.711884 |
| C  | 1.697845  | -0.346523 | -2.693444 |
| C  | 3.685053  | -2.290031 | -2.988063 |
| H  | 3.784195  | -2.315605 | -0.837692 |
| C  | 2.098753  | -0.750368 | -3.973214 |
| H  | 0.925352  | 0.416818  | -2.576314 |
| C  | 3.088587  | -1.724275 | -4.123012 |
| H  | 4.464968  | -3.048148 | -3.098241 |
| H  | 1.632143  | -0.300611 | -4.853760 |
| H  | 3.400818  | -2.041383 | -5.121742 |
| C  | -1.848051 | 4.171467  | -0.054052 |
| H  | -2.510322 | 3.853197  | -0.873107 |

|   |           |          |           |
|---|-----------|----------|-----------|
| H | -2.457262 | 4.151986 | 0.864001  |
| H | -1.530833 | 5.212588 | -0.231830 |
| C | 1.663061  | 4.237008 | 0.351749  |
| N | 2.557876  | 4.982763 | 0.451885  |

**Complex 23 - [Pt(PPh<sub>3</sub>)<sub>2</sub>(HC≡CCN)]**

H   -1.593917   3.882044   -0.108166

|    |           |           |           |
|----|-----------|-----------|-----------|
| Pt | 0.013823  | 1.372318  | -0.009511 |
| P  | 1.813323  | -0.226219 | 0.088326  |
| C  | 0.609882  | 3.399046  | 0.043168  |
| C  | -0.686879 | 3.280536  | -0.043507 |
| P  | -1.913102 | 0.004757  | -0.090520 |
| C  | -2.509428 | -0.618117 | 1.544929  |
| C  | -3.765297 | -1.243554 | 1.671483  |
| C  | -1.742112 | -0.391971 | 2.696902  |
| C  | -4.231483 | -1.645579 | 2.924170  |
| H  | -4.388783 | -1.409107 | 0.789583  |
| C  | -2.213863 | -0.790597 | 3.953153  |
| H  | -0.775452 | 0.106662  | 2.605381  |
| C  | -3.456446 | -1.418069 | 4.068402  |
| H  | -5.207376 | -2.130656 | 3.008673  |
| H  | -1.607170 | -0.604173 | 4.842398  |
| H  | -3.827370 | -1.724726 | 5.049377  |
| C  | -1.880859 | -1.465847 | -1.208290 |
| C  | -1.593001 | -1.253225 | -2.569684 |
| C  | -2.083938 | -2.781273 | -0.759927 |
| C  | -1.545143 | -2.323868 | -3.464953 |
| H  | -1.405379 | -0.240909 | -2.935427 |
| C  | -2.022395 | -3.854154 | -1.656694 |
| H  | -2.287797 | -2.979912 | 0.292648  |
| C  | -1.760843 | -3.629491 | -3.010598 |
| H  | -1.329090 | -2.137118 | -4.519615 |
| H  | -2.183805 | -4.871197 | -1.290588 |
| H  | -1.719888 | -4.468003 | -3.709991 |
| C  | -3.422860 | 0.946870  | -0.640587 |
| C  | -3.818802 | 2.041215  | 0.151934  |
| C  | -4.188080 | 0.625527  | -1.771398 |
| C  | -4.945522 | 2.794876  | -0.180933 |
| H  | -3.246506 | 2.301616  | 1.044923  |
| C  | -5.314888 | 1.387254  | -2.108455 |
| H  | -3.920574 | -0.225668 | -2.397563 |
| C  | -5.697144 | 2.473038  | -1.317924 |
| H  | -5.238654 | 3.637952  | 0.450286  |
| H  | -5.897825 | 1.120550  | -2.993638 |
| H  | -6.576510 | 3.068602  | -1.579710 |
| C  | 3.495513  | 0.446684  | 0.524112  |
| C  | 3.847119  | 1.705909  | 0.013404  |
| C  | 4.454421  | -0.281437 | 1.247269  |
| C  | 5.126222  | 2.231200  | 0.222046  |
| H  | 3.118698  | 2.280751  | -0.558294 |
| C  | 5.730419  | 0.247255  | 1.461546  |
| H  | 4.215156  | -1.265066 | 1.650528  |
| C  | 6.071741  | 1.504231  | 0.952047  |
| H  | 5.375315  | 3.217063  | -0.179342 |
| H  | 6.463926  | -0.330359 | 2.030227  |
| H  | 7.070578  | 1.915302  | 1.123121  |
| C  | 1.577657  | -1.591441 | 1.310004  |
| C  | 1.740225  | -1.306184 | 2.679404  |
| C  | 1.138353  | -2.872092 | 0.936779  |
| C  | 1.500751  | -2.285290 | 3.645951  |
| H  | 2.064365  | -0.312075 | 2.997065  |
| C  | 0.891695  | -3.849811 | 1.908001  |
| H  | 0.986125  | -3.118417 | -0.115172 |
| C  | 1.077707  | -3.563236 | 3.262829  |
| H  | 1.643862  | -2.047565 | 4.703334  |
| H  | 0.554997  | -4.842482 | 1.598570  |
| H  | 0.890975  | -4.330331 | 4.018763  |
| C  | 2.246238  | -1.044983 | -1.517081 |
| C  | 3.139916  | -2.129624 | -1.588968 |
| C  | 1.763791  | -0.483312 | -2.708856 |
| C  | 3.523095  | -2.649996 | -2.826916 |
| H  | 3.548656  | -2.569844 | -0.676636 |
| C  | 2.157509  | -0.998146 | -3.949325 |
| H  | 1.082588  | 0.369317  | -2.661083 |
| C  | 3.032712  | -2.085047 | -4.010780 |
| H  | 4.213917  | -3.496105 | -2.868247 |
| H  | 1.775190  | -0.547845 | -4.868605 |
| H  | 3.337876  | -2.491113 | -4.978628 |
| C  | 1.650878  | 4.324223  | 0.106247  |
| N  | 2.557313  | 5.059256  | 0.153885  |



**Complex 24 - [Pt(PPh<sub>3</sub>)<sub>2</sub>(NCC≡CCN)]**

|    |           |           |           |
|----|-----------|-----------|-----------|
| Pt | 0.011283  | -1.196259 | -0.000630 |
| P  | 1.872758  | 0.265886  | -0.018660 |
| C  | 0.637216  | -3.166545 | -0.051317 |
| C  | -0.683833 | -3.146499 | -0.051616 |
| P  | -1.845123 | 0.292163  | 0.040320  |
| C  | -2.779549 | 0.279605  | -1.553467 |
| C  | -4.105168 | 0.747919  | -1.627759 |
| C  | -2.171184 | -0.224082 | -2.713723 |
| C  | -4.797348 | 0.724125  | -2.840853 |
| H  | -4.605651 | 1.127101  | -0.734052 |
| C  | -2.866328 | -0.248199 | -3.928214 |
| H  | -1.153175 | -0.615978 | -2.659734 |
| C  | -4.178691 | 0.227599  | -3.994259 |
| H  | -5.826368 | 1.089917  | -2.884406 |
| H  | -2.380658 | -0.647590 | -4.821810 |
| H  | -4.723861 | 0.205244  | -4.941457 |
| C  | -1.616532 | 2.079453  | 0.455011  |
| C  | -0.947572 | 2.409925  | 1.648139  |
| C  | -2.098889 | 3.119552  | -0.355888 |
| C  | -0.794662 | 3.743073  | 2.036313  |
| H  | -0.543687 | 1.623622  | 2.288042  |
| C  | -1.935716 | 4.454947  | 0.029517  |
| H  | -2.604437 | 2.897991  | -1.296180 |
| C  | -1.291898 | 4.771092  | 1.228609  |
| H  | -0.280133 | 3.977047  | 2.971748  |
| H  | -2.317831 | 5.250497  | -0.615187 |
| H  | -1.171350 | 5.814699  | 1.530023  |
| C  | -3.145603 | -0.260870 | 1.249216  |
| C  | -3.775730 | -1.496195 | 1.006595  |
| C  | -3.517237 | 0.472509  | 2.387124  |
| C  | -4.744986 | -1.988488 | 1.881976  |
| H  | -3.517268 | -2.081210 | 0.122451  |
| C  | -4.486882 | -0.025436 | 3.266941  |
| H  | -3.062552 | 1.441118  | 2.597865  |
| C  | -5.101903 | -1.255295 | 3.020096  |
| H  | -5.219115 | -2.951064 | 1.672694  |
| H  | -4.762206 | 0.560111  | 4.148082  |
| H  | -5.858479 | -1.641056 | 3.708132  |
| C  | 3.382933  | -0.488715 | -0.796059 |
| C  | 3.944964  | -1.616717 | -0.171669 |
| C  | 3.986353  | 0.010891  | -1.960994 |
| C  | 5.080624  | -2.231710 | -0.700975 |
| H  | 3.494438  | -2.020787 | 0.737545  |
| C  | 5.123355  | -0.610201 | -2.492271 |
| H  | 3.580186  | 0.889935  | -2.461891 |
| C  | 5.673323  | -1.730890 | -1.866037 |
| H  | 5.497041  | -3.111464 | -0.204841 |
| H  | 5.580649  | -0.208113 | -3.400125 |
| H  | 6.560498  | -2.214303 | -2.282647 |
| C  | 1.671185  | 1.844683  | -0.953862 |
| C  | 1.135656  | 1.752714  | -2.251754 |
| C  | 2.038143  | 3.106678  | -0.461919 |
| C  | 0.998625  | 2.890687  | -3.049699 |
| H  | 0.830599  | 0.780989  | -2.646530 |
| C  | 1.889523  | 4.247525  | -1.259091 |
| H  | 2.433304  | 3.213318  | 0.548441  |
| C  | 1.377994  | 4.143065  | -2.555060 |
| H  | 0.589357  | 2.798117  | -4.058672 |
| H  | 2.174215  | 5.223777  | -0.859068 |
| H  | 1.267671  | 5.035420  | -3.176250 |
| C  | 2.516387  | 0.688359  | 1.659627  |
| C  | 3.740568  | 1.363757  | 1.828790  |
| C  | 1.809289  | 0.266135  | 2.797596  |
| C  | 4.223329  | 1.642407  | 3.109604  |
| H  | 4.329310  | 1.664129  | 0.958648  |
| C  | 2.298272  | 0.540109  | 4.080236  |
| H  | 0.881141  | -0.298821 | 2.675385  |
| C  | 3.500747  | 1.235059  | 4.237975  |
| H  | 5.172406  | 2.172111  | 3.227255  |
| H  | 1.739176  | 0.201731  | 4.956369  |
| H  | 3.883278  | 1.449363  | 5.239200  |
| C  | 1.674008  | -4.103338 | -0.071498 |
| N  | 2.560862  | -4.861929 | -0.089463 |

|   |           |           |           |
|---|-----------|-----------|-----------|
| C | -1.751204 | -4.046749 | -0.089906 |
| N | -2.668085 | -4.769504 | -0.105910 |

**Complex 25 - [Pt(F<sub>3</sub>CC≡CCF<sub>3</sub>)(PPh<sub>3</sub>)<sub>2</sub>]**

|    |           |           |           |
|----|-----------|-----------|-----------|
| Pt | 0.008616  | 0.790391  | -0.163139 |
| P  | 1.816403  | -0.735193 | 0.081017  |
| C  | 0.817059  | 2.678975  | -0.146311 |
| C  | -0.465638 | 2.803060  | -0.332116 |
| P  | -1.935625 | -0.598549 | -0.077955 |
| C  | -2.264567 | -1.341878 | 1.586977  |
| C  | -3.383712 | -2.167157 | 1.810573  |
| C  | -1.463367 | -0.976218 | 2.678229  |
| C  | -3.675546 | -2.632950 | 3.093203  |
| H  | -4.042356 | -2.439065 | 0.982626  |
| C  | -1.765283 | -1.433730 | 3.966837  |
| H  | -0.605558 | -0.320723 | 2.519938  |
| C  | -2.866306 | -2.265852 | 4.176176  |
| H  | -4.545195 | -3.275963 | 3.250797  |
| H  | -1.132212 | -1.135481 | 4.805729  |
| H  | -3.101340 | -2.624374 | 5.181638  |
| C  | -2.056027 | -1.987161 | -1.287435 |
| C  | -2.176978 | -1.662082 | -2.652217 |
| C  | -1.976456 | -3.338975 | -0.919944 |
| C  | -2.257336 | -2.666258 | -3.618763 |
| H  | -2.214695 | -0.614737 | -2.963630 |
| C  | -2.048774 | -4.344023 | -1.891575 |
| H  | -1.857031 | -3.619245 | 0.127649  |
| C  | -2.198911 | -4.012529 | -3.239796 |
| H  | -2.364572 | -2.395686 | -4.672167 |
| H  | -1.987180 | -5.391945 | -1.587682 |
| H  | -2.262419 | -4.799069 | -3.995864 |
| C  | -3.558248 | 0.289814  | -0.299926 |
| C  | -3.748188 | 1.472952  | 0.431964  |
| C  | -4.622547 | -0.203643 | -1.072188 |
| C  | -4.965629 | 2.154146  | 0.387519  |
| H  | -2.934927 | 1.873499  | 1.038949  |
| C  | -5.842230 | 0.481988  | -1.118684 |
| H  | -4.513794 | -1.126816 | -1.642393 |
| C  | -6.018242 | 1.661379  | -0.390967 |
| H  | -5.085555 | 3.078940  | 0.956963  |
| H  | -6.658612 | 0.085733  | -1.728314 |
| H  | -6.970938 | 2.195639  | -0.430949 |
| C  | 3.454066  | 0.003232  | -0.397402 |
| C  | 3.511316  | 0.792419  | -1.557369 |
| C  | 4.646557  | -0.291149 | 0.283634  |
| C  | 4.732631  | 1.287354  | -2.020993 |
| H  | 2.591552  | 1.033473  | -2.095393 |
| C  | 5.867510  | 0.211017  | -0.177981 |
| H  | 4.631487  | -0.911839 | 1.181796  |
| C  | 5.914500  | 1.001205  | -1.331050 |
| H  | 4.757648  | 1.908555  | -2.920246 |
| H  | 6.786484  | -0.018361 | 0.367784  |
| H  | 6.869530  | 1.394731  | -1.688813 |
| C  | 2.043605  | -1.234425 | 1.841116  |
| C  | 2.452817  | -0.247301 | 2.759136  |
| C  | 1.712917  | -2.511218 | 2.321957  |
| C  | 2.564050  | -0.545997 | 4.118703  |
| H  | 2.683840  | 0.761876  | 2.409045  |
| C  | 1.826050  | -2.807128 | 3.685128  |
| H  | 1.357363  | -3.283386 | 1.637991  |
| C  | 2.257394  | -1.830120 | 4.585553  |
| H  | 2.890878  | 0.229008  | 4.816698  |
| H  | 1.570119  | -3.807913 | 4.041926  |
| H  | 2.348269  | -2.064241 | 5.649240  |
| C  | 1.938108  | -2.271538 | -0.945108 |
| C  | 2.820540  | -3.323277 | -0.635861 |
| C  | 1.260478  | -2.293438 | -2.172951 |
| C  | 2.995934  | -4.384118 | -1.527379 |
| H  | 3.390077  | -3.314449 | 0.295275  |
| C  | 1.451291  | -3.347871 | -3.072287 |
| H  | 0.586811  | -1.474669 | -2.430909 |
| C  | 2.313580  | -4.397933 | -2.749297 |
| H  | 3.680225  | -5.196938 | -1.271544 |
| H  | 0.918036  | -3.346358 | -4.025330 |
| H  | 2.460547  | -5.224173 | -3.449630 |
| C  | -1.441562 | 3.901558  | -0.511917 |
| C  | 2.004637  | 3.549765  | 0.008697  |

|   |           |          |           |
|---|-----------|----------|-----------|
| F | -0.852719 | 5.053752 | -0.896349 |
| F | -2.108042 | 4.174129 | 0.633960  |
| F | -2.368421 | 3.615155 | -1.446276 |
| F | 1.690149  | 4.742958 | 0.555983  |
| F | 2.943135  | 2.999940 | 0.807487  |
| F | 2.599543  | 3.808984 | -1.174541 |

**Complex 26 - [Pt(F<sub>2</sub>C=CF<sub>2</sub>)(PPh<sub>3</sub>)<sub>2</sub>]**

|    |           |           |           |
|----|-----------|-----------|-----------|
| Pt | -0.009753 | 0.903577  | -0.085034 |
| P  | 1.926780  | -0.507568 | 0.003206  |
| C  | 0.721381  | 2.814926  | 0.010959  |
| C  | -0.640859 | 2.846276  | -0.307973 |
| P  | -1.961984 | -0.484060 | 0.008455  |
| C  | -2.098102 | -1.633880 | 1.454952  |
| C  | -3.226481 | -2.456636 | 1.638782  |
| C  | -1.121496 | -1.588781 | 2.460996  |
| C  | -3.353011 | -3.236649 | 2.789887  |
| H  | -4.020413 | -2.479980 | 0.887953  |
| C  | -1.256594 | -2.360747 | 3.622005  |
| H  | -0.257489 | -0.933910 | 2.342515  |
| C  | -2.366977 | -3.190468 | 3.785683  |
| H  | -4.229369 | -3.876714 | 2.916731  |
| H  | -0.487198 | -2.307938 | 4.396883  |
| H  | -2.471951 | -3.793981 | 4.691151  |
| C  | -2.336291 | -1.483213 | -1.497284 |
| C  | -2.520740 | -0.786194 | -2.706997 |
| C  | -2.369595 | -2.886150 | -1.513242 |
| C  | -2.766076 | -1.478257 | -3.895356 |
| H  | -2.474642 | 0.306221  | -2.718389 |
| C  | -2.612059 | -3.577309 | -2.706642 |
| H  | -2.200411 | -3.451007 | -0.596122 |
| C  | -2.816930 | -2.877714 | -3.897679 |
| H  | -2.916699 | -0.922075 | -4.823353 |
| H  | -2.637884 | -4.670005 | -2.701233 |
| H  | -3.010764 | -3.420281 | -4.826927 |
| C  | -3.522583 | 0.487590  | 0.282200  |
| C  | -3.507311 | 1.459880  | 1.297749  |
| C  | -4.718984 | 0.244828  | -0.409346 |
| C  | -4.663828 | 2.172477  | 1.616546  |
| H  | -2.578898 | 1.671549  | 1.833781  |
| C  | -5.875817 | 0.968801  | -0.095943 |
| H  | -4.759921 | -0.508156 | -1.199427 |
| C  | -5.852913 | 1.932368  | 0.917611  |
| H  | -4.634277 | 2.926604  | 2.408376  |
| H  | -6.798207 | 0.773731  | -0.649120 |
| H  | -6.754833 | 2.501133  | 1.160496  |
| C  | 3.430317  | 0.363141  | -0.657533 |
| C  | 3.282979  | 1.198575  | -1.776072 |
| C  | 4.714267  | 0.147125  | -0.135196 |
| C  | 4.397565  | 1.804341  | -2.362492 |
| H  | 2.285246  | 1.389628  | -2.180134 |
| C  | 5.827362  | 0.762456  | -0.716439 |
| H  | 4.857385  | -0.496491 | 0.734703  |
| C  | 5.673197  | 1.590834  | -1.830881 |
| H  | 4.265124  | 2.455305  | -3.230234 |
| H  | 6.821151  | 0.590563  | -0.292967 |
| H  | 6.545179  | 2.069649  | -2.283831 |
| C  | 2.419139  | -1.004004 | 1.711734  |
| C  | 2.823398  | 0.010039  | 2.602750  |
| C  | 2.305245  | -2.320270 | 2.188395  |
| C  | 3.133948  | -0.296368 | 3.929565  |
| H  | 2.901217  | 1.043361  | 2.254610  |
| C  | 2.616800  | -2.622921 | 3.519372  |
| H  | 1.967238  | -3.119479 | 1.526654  |
| C  | 3.035841  | -1.614774 | 4.391474  |
| H  | 3.453654  | 0.500181  | 4.606699  |
| H  | 2.528060  | -3.654074 | 3.872286  |
| H  | 3.281925  | -1.853248 | 5.429643  |
| C  | 2.019873  | -2.035249 | -1.039062 |
| C  | 3.071988  | -2.964158 | -0.919117 |
| C  | 1.098386  | -2.186101 | -2.085849 |
| C  | 3.183383  | -4.026979 | -1.816359 |
| H  | 3.818786  | -2.858724 | -0.129931 |
| C  | 1.218062  | -3.245520 | -2.992304 |
| H  | 0.287935  | -1.464861 | -2.201143 |
| C  | 2.257712  | -4.168691 | -2.857409 |
| H  | 4.003551  | -4.742241 | -1.707714 |
| H  | 0.492178  | -3.343736 | -3.803287 |
| H  | 2.353354  | -4.995868 | -3.563895 |
| C  | -1.587182 | 3.694619  | -0.673553 |
| C  | 1.724839  | 3.601176  | 0.359020  |

|   |           |          |           |
|---|-----------|----------|-----------|
| F | -1.439093 | 5.019020 | -0.768406 |
| F | -2.833609 | 3.378010 | -1.018165 |
| F | 1.691695  | 4.935246 | 0.402591  |
| F | 2.937522  | 3.191023 | 0.737452  |

**Complex 27 - [Pt(H<sub>2</sub>C=CH<sub>2</sub>)(PPh<sub>3</sub>)<sub>2</sub>]**

|    |           |           |           |           |
|----|-----------|-----------|-----------|-----------|
|    | H         | -1.252017 | -3.439062 | -1.503561 |
|    | H         | 1.226780  | -3.779204 | 0.349186  |
| Pt | 0.028533  | -1.353261 | -0.188424 |           |
| P  | -1.944870 | -0.042259 | 0.001920  |           |
| P  | 1.968648  | -0.018187 | 0.019655  |           |
| C  | -2.732510 | 0.361571  | -1.628773 |           |
| C  | -2.457372 | -0.470983 | -2.728047 |           |
| C  | -3.043078 | -0.225166 | -3.973850 |           |
| C  | -3.905423 | 0.862900  | -4.142443 |           |
| C  | -4.179277 | 1.703123  | -3.058213 |           |
| C  | -3.597505 | 1.455637  | -1.810519 |           |
| C  | -1.956454 | 1.608967  | 0.854324  |           |
| C  | -2.668532 | 1.857965  | 2.039137  |           |
| C  | -2.591938 | 3.107408  | 2.667753  |           |
| C  | -1.811243 | 4.126884  | 2.118184  |           |
| C  | -1.100344 | 3.889598  | 0.935511  |           |
| C  | -1.165966 | 2.641148  | 0.314430  |           |
| C  | -3.274135 | -0.958638 | 0.919304  |           |
| C  | -4.634349 | -0.904621 | 0.573575  |           |
| C  | -5.584857 | -1.617937 | 1.312815  |           |
| C  | -5.191065 | -2.386645 | 2.412332  |           |
| C  | -3.838417 | -2.446386 | 2.766142  |           |
| C  | -2.887232 | -1.745478 | 2.019574  |           |
| C  | 2.033841  | 1.458903  | -1.098793 |           |
| C  | 1.437429  | 1.334891  | -2.366928 |           |
| C  | 1.448213  | 2.402897  | -3.268212 |           |
| C  | 2.042022  | 3.617890  | -2.908269 |           |
| C  | 2.628572  | 3.754616  | -1.646337 |           |
| C  | 2.628935  | 2.681510  | -0.747830 |           |
| C  | 2.373080  | 0.654703  | 1.699671  |           |
| C  | 1.323066  | 0.874477  | 2.607241  |           |
| C  | 1.579066  | 1.383566  | 3.884738  |           |
| C  | 2.889814  | 1.671728  | 4.275906  |           |
| C  | 3.944330  | 1.450028  | 3.383141  |           |
| C  | 3.688990  | 0.945074  | 2.104466  |           |
| C  | 3.543175  | -0.909645 | -0.406350 |           |
| C  | 3.868186  | -2.059445 | 0.338070  |           |
| C  | 5.024260  | -2.789449 | 0.057029  |           |
| C  | 5.870462  | -2.393212 | -0.986658 |           |
| C  | 5.552267  | -1.259795 | -1.738265 |           |
| C  | 4.398747  | -0.518873 | -1.447932 |           |
| C  | 0.706769  | -3.368082 | -0.523562 |           |
| C  | -0.723619 | -3.345777 | -0.547551 |           |
| H  | -1.772795 | -1.313070 | -2.602238 |           |
| H  | -2.818409 | -0.883569 | -4.817094 |           |
| H  | -4.359402 | 1.059020  | -5.117456 |           |
| H  | -4.848712 | 2.558470  | -3.182556 |           |
| H  | -3.818643 | 2.124135  | -0.975769 |           |
| H  | -3.291278 | 1.077552  | 2.479440  |           |
| H  | -3.152976 | 3.281754  | 3.589746  |           |
| H  | -1.754725 | 5.102425  | 2.607913  |           |
| H  | -0.484411 | 4.678631  | 0.496591  |           |
| H  | -0.594861 | 2.468461  | -0.600153 |           |
| H  | -4.961149 | -0.306830 | -0.279503 |           |
| H  | -6.638659 | -1.570567 | 1.025333  |           |
| H  | -5.934939 | -2.942595 | 2.988889  |           |
| H  | -3.520093 | -3.049815 | 3.620505  |           |
| H  | -1.828214 | -1.816068 | 2.282852  |           |
| H  | 0.950415  | 0.394570  | -2.639479 |           |
| H  | 0.982254  | 2.288400  | -4.250239 |           |
| H  | 2.043198  | 4.457330  | -3.608269 |           |
| H  | 3.090293  | 4.702088  | -1.356204 |           |
| H  | 3.090997  | 2.806290  | 0.233232  |           |
| H  | 0.299371  | 0.641946  | 2.308979  |           |
| H  | 0.749966  | 1.550173  | 4.576495  |           |
| H  | 3.091341  | 2.063462  | 5.276486  |           |
| H  | 4.972935  | 1.668279  | 3.683134  |           |
| H  | 4.523978  | 0.770766  | 1.421370  |           |
| H  | 3.207678  | -2.385048 | 1.145673  |           |
| H  | 5.263104  | -3.675970 | 0.650767  |           |
| H  | 6.772338  | -2.968655 | -1.211809 |           |
| H  | 6.205833  | -0.941468 | -2.555011 |           |
| H  | 4.171598  | 0.369046  | -2.040681 |           |
| H  | 1.268979  | -3.469703 | -1.459798 |           |
| H  | -1.289456 | -3.732233 | 0.307789  |           |

# Complex 28 - [Pt(P(O-o-tolyl)<sub>3</sub>)]

|    |              |              |              |
|----|--------------|--------------|--------------|
| Pt | 0.052448000  | 0.441580000  | -0.141424000 |
| P  | -1.557842000 | -1.114550000 | 0.420023000  |
| P  | 1.995868000  | -0.583333000 | -0.860108000 |
| P  | -0.229701000 | 2.684498000  | 0.228462000  |
| O  | -2.312083000 | -1.732965000 | -0.890891000 |
| O  | -2.766775000 | -0.710133000 | 1.485371000  |
| O  | -1.009265000 | -2.528387000 | 1.130242000  |
| O  | 2.693690000  | -1.499030000 | 0.300460000  |
| O  | 1.889917000  | -1.707890000 | -2.100947000 |
| O  | 3.240536000  | 0.372549000  | -1.415320000 |
| O  | 0.825639000  | 3.767901000  | -0.479241000 |
| O  | -1.674591000 | 3.462486000  | -0.052287000 |
| O  | -0.204359000 | 3.157326000  | 1.819065000  |
| C  | 0.910251000  | 5.145637000  | -0.275242000 |
| C  | 1.435131000  | 5.637378000  | 0.925628000  |
| C  | 0.561187000  | 6.014276000  | -1.328688000 |
| C  | 1.581353000  | 7.013671000  | 1.114241000  |
| H  | 1.749970000  | 4.940161000  | 1.702819000  |
| C  | 0.716675000  | 7.392591000  | -1.108802000 |
| C  | 1.211250000  | 7.897371000  | 0.096768000  |
| H  | 1.994534000  | 7.387876000  | 2.055094000  |
| H  | 0.446312000  | 8.083291000  | -1.914056000 |
| H  | 1.319044000  | 8.975796000  | 0.234155000  |
| C  | -4.124820000 | -0.959458000 | 1.636711000  |
| C  | -4.605143000 | -2.146414000 | 2.229943000  |
| C  | -4.997641000 | 0.078921000  | 1.283866000  |
| C  | -5.995802000 | -2.252271000 | 2.410988000  |
| C  | -6.374324000 | -0.054127000 | 1.485576000  |
| H  | -4.574340000 | 0.992699000  | 0.862883000  |
| C  | -6.878115000 | -1.231324000 | 2.045841000  |
| H  | -6.388515000 | -3.165659000 | 2.867505000  |
| H  | -7.048188000 | 0.762216000  | 1.210183000  |
| H  | -7.952406000 | -1.352344000 | 2.211554000  |
| C  | 3.689634000  | -2.458760000 | 0.427538000  |
| C  | 4.309566000  | -2.534391000 | 1.689534000  |
| C  | 4.027065000  | -3.336973000 | -0.607051000 |
| C  | 5.281817000  | -3.529226000 | 1.873029000  |
| C  | 5.000939000  | -4.317024000 | -0.392505000 |
| H  | 3.531489000  | -3.247008000 | -1.569808000 |
| C  | 5.628486000  | -4.419001000 | 0.853717000  |
| H  | 5.774983000  | -3.602131000 | 2.845589000  |
| H  | 5.265068000  | -5.002292000 | -1.208320000 |
| H  | 6.389157000  | -5.183777000 | 1.028173000  |
| C  | 0.949888000  | -1.641815000 | -3.115841000 |
| C  | 0.616500000  | -0.425950000 | -3.722423000 |
| C  | 0.377722000  | -2.856418000 | -3.543562000 |
| C  | -0.315019000 | -0.401131000 | -4.764975000 |
| H  | 1.094097000  | 0.496057000  | -3.388289000 |
| C  | -0.549135000 | -2.798886000 | -4.594419000 |
| C  | -0.900769000 | -1.589693000 | -5.203425000 |
| H  | -0.569434000 | 0.550828000  | -5.236890000 |
| H  | -1.005568000 | -3.730213000 | -4.940180000 |
| H  | -1.625989000 | -1.579808000 | -6.020417000 |
| C  | 4.608502000  | 0.128860000  | -1.499640000 |
| C  | 5.386705000  | 0.282974000  | -0.348287000 |
| C  | 5.192807000  | -0.165365000 | -2.746915000 |
| C  | 6.769634000  | 0.100477000  | -0.408062000 |
| H  | 4.896691000  | 0.547133000  | 0.589989000  |
| C  | 6.586193000  | -0.340284000 | -2.776837000 |
| C  | 7.371926000  | -0.220662000 | -1.627265000 |
| H  | 7.371406000  | 0.213055000  | 0.496941000  |
| H  | 7.062101000  | -0.570771000 | -3.734234000 |
| H  | 8.453112000  | -0.366179000 | -1.687641000 |
| C  | -3.191668000 | -2.778601000 | -1.155360000 |
| C  | -4.391528000 | -2.457908000 | -1.823139000 |
| C  | -2.836653000 | -4.102013000 | -0.876005000 |
| C  | -5.245224000 | -3.520958000 | -2.155253000 |
| C  | -3.708661000 | -5.138571000 | -1.223908000 |
| H  | -1.879593000 | -4.308401000 | -0.399181000 |
| C  | -4.920479000 | -4.848462000 | -1.856701000 |
| H  | -6.185160000 | -3.294736000 | -2.667987000 |
| H  | -3.431345000 | -6.172938000 | -1.004148000 |
| H  | -5.607675000 | -5.652615000 | -2.131152000 |

|   |              |              |              |
|---|--------------|--------------|--------------|
| C | -0.329406000 | -2.625180000 | 2.328808000  |
| C | 0.306462000  | -3.857681000 | 2.591139000  |
| C | -0.301570000 | -1.585297000 | 3.267304000  |
| C | 0.946915000  | -4.009537000 | 3.828753000  |
| C | 0.347491000  | -1.768564000 | 4.491948000  |
| H | -0.800704000 | -0.639647000 | 3.056176000  |
| C | 0.968944000  | -2.984352000 | 4.780638000  |
| H | 1.442615000  | -4.960100000 | 4.045951000  |
| H | 0.360569000  | -0.950177000 | 5.215276000  |
| H | 1.474722000  | -3.135508000 | 5.737024000  |
| C | 0.701966000  | 2.704351000  | 2.759201000  |
| C | 0.222822000  | 2.546198000  | 4.074187000  |
| C | 2.045230000  | 2.475355000  | 2.438657000  |
| C | 1.148301000  | 2.163568000  | 5.057555000  |
| C | 2.942943000  | 2.097940000  | 3.442502000  |
| H | 2.388685000  | 2.592785000  | 1.409605000  |
| C | 2.496851000  | 1.945047000  | 4.756290000  |
| H | 0.795476000  | 2.037786000  | 6.087142000  |
| H | 3.992549000  | 1.933092000  | 3.190324000  |
| H | 3.193620000  | 1.653904000  | 5.546515000  |
| C | -2.542566000 | 3.171875000  | -1.086030000 |
| C | -3.910960000 | 3.429120000  | -0.861582000 |
| C | -2.089231000 | 2.683315000  | -2.319370000 |
| C | -4.798316000 | 3.187612000  | -1.923883000 |
| C | -2.997532000 | 2.455469000  | -3.357380000 |
| H | -1.024889000 | 2.488788000  | -2.471939000 |
| C | -4.357441000 | 2.711755000  | -3.163264000 |
| H | -5.864699000 | 3.380430000  | -1.767686000 |
| H | -2.633264000 | 2.080142000  | -4.318008000 |
| H | -5.073741000 | 2.536580000  | -3.971205000 |
| C | 3.931668000  | -1.600282000 | 2.809239000  |
| H | 3.650797000  | -0.604843000 | 2.436920000  |
| H | 3.058086000  | -1.982772000 | 3.365252000  |
| H | 4.763033000  | -1.491234000 | 3.523583000  |
| C | 4.369353000  | -0.260176000 | -4.004109000 |
| H | 3.648985000  | -1.091328000 | -3.954828000 |
| H | 3.783314000  | 0.660006000  | -4.168327000 |
| H | 5.015685000  | -0.416466000 | -4.881002000 |
| C | 0.766139000  | -4.163440000 | -2.904496000 |
| H | 0.119044000  | -4.979111000 | -3.256733000 |
| H | 1.809627000  | -4.432189000 | -3.141909000 |
| H | 0.696066000  | -4.110691000 | -1.807534000 |
| C | 0.064565000  | 5.496961000  | -2.654198000 |
| H | 0.697224000  | 4.674780000  | -3.028536000 |
| H | -0.960926000 | 5.101545000  | -2.579907000 |
| H | 0.058109000  | 6.299779000  | -3.405172000 |
| C | -1.227355000 | 2.794609000  | 4.405368000  |
| H | -1.476391000 | 2.379906000  | 5.395645000  |
| H | -1.458914000 | 3.875130000  | 4.423087000  |
| H | -1.893231000 | 2.339397000  | 3.657174000  |
| C | -4.401073000 | 3.962941000  | 0.461280000  |
| H | -4.357029000 | 5.062457000  | 0.493791000  |
| H | -5.445880000 | 3.671901000  | 0.627914000  |
| H | -3.792893000 | 3.594747000  | 1.298759000  |
| C | -4.725050000 | -1.036752000 | -2.188616000 |
| H | -4.853272000 | -0.412572000 | -1.291375000 |
| H | -3.918566000 | -0.576436000 | -2.779789000 |
| H | -5.657480000 | -0.988464000 | -2.768953000 |
| C | 0.281516000  | -4.974698000 | 1.580375000  |
| H | 0.890400000  | -5.824287000 | 1.920822000  |
| H | -0.744779000 | -5.340785000 | 1.408009000  |
| H | 0.671546000  | -4.642112000 | 0.605221000  |
| C | -3.696071000 | -3.254060000 | 2.692960000  |
| H | -3.164780000 | -3.722007000 | 1.850723000  |
| H | -2.929004000 | -2.880323000 | 3.388486000  |
| H | -4.274028000 | -4.035061000 | 3.206652000  |

# Complex 29 - [Pt(PPh<sub>3</sub>)<sub>3</sub>]

|    |              |              |              |
|----|--------------|--------------|--------------|
| P  | -2.248093000 | 0.787555000  | 0.011033000  |
| P  | 1.793539000  | 1.543923000  | -0.016589000 |
| C  | 2.321599000  | 2.060156000  | 1.688659000  |
| C  | 3.627743000  | 2.485054000  | 1.991354000  |
| C  | 1.370990000  | 2.021167000  | 2.724552000  |
| C  | 3.969122000  | 2.870232000  | 3.291907000  |
| H  | 4.388849000  | 2.514335000  | 1.208937000  |
| C  | 1.710638000  | 2.411788000  | 4.023779000  |
| H  | 0.360105000  | 1.666741000  | 2.507279000  |
| C  | 3.011464000  | 2.837569000  | 4.311127000  |
| H  | 4.989534000  | 3.197183000  | 3.508659000  |
| H  | 0.957369000  | 2.374116000  | 4.815034000  |
| H  | 3.280476000  | 3.136929000  | 5.327425000  |
| C  | 1.516839000  | 3.160400000  | -0.893731000 |
| C  | 0.764132000  | 3.131895000  | -2.080869000 |
| C  | 2.010980000  | 4.394598000  | -0.440725000 |
| C  | 0.528948000  | 4.301035000  | -2.809270000 |
| H  | 0.346986000  | 2.181850000  | -2.426627000 |
| C  | 1.760512000  | 5.568987000  | -1.160173000 |
| H  | 2.594443000  | 4.448994000  | 0.480218000  |
| C  | 1.024362000  | 5.525728000  | -2.348006000 |
| H  | -0.055751000 | 4.257552000  | -3.731838000 |
| H  | 2.146767000  | 6.522108000  | -0.788969000 |
| H  | 0.831416000  | 6.443538000  | -2.909427000 |
| C  | 3.415238000  | 1.006875000  | -0.764934000 |
| C  | 4.067788000  | -0.108054000 | -0.204293000 |
| C  | 3.990516000  | 1.621970000  | -1.888931000 |
| C  | 5.266113000  | -0.581610000 | -0.740926000 |
| H  | 3.632906000  | -0.613112000 | 0.660747000  |
| C  | 5.183795000  | 1.134569000  | -2.438625000 |
| H  | 3.511035000  | 2.489775000  | -2.344880000 |
| C  | 5.827912000  | 0.035642000  | -1.865764000 |
| H  | 5.758434000  | -1.443866000 | -0.283737000 |
| H  | 5.611987000  | 1.625699000  | -3.316629000 |
| H  | 6.761209000  | -0.340811000 | -2.292377000 |
| C  | -3.326338000 | 0.005413000  | -1.283179000 |
| C  | -2.769482000 | -0.192012000 | -2.560303000 |
| C  | -4.647902000 | -0.409799000 | -1.053107000 |
| C  | -3.518987000 | -0.774436000 | -3.585543000 |
| H  | -1.731866000 | 0.100295000  | -2.742887000 |
| C  | -5.394910000 | -1.005599000 | -2.076877000 |
| H  | -5.102313000 | -0.271397000 | -0.070053000 |
| C  | -4.835492000 | -1.185989000 | -3.345344000 |
| H  | -3.070623000 | -0.917078000 | -4.572257000 |
| H  | -6.420866000 | -1.327803000 | -1.879674000 |
| H  | -5.420675000 | -1.650093000 | -4.143451000 |
| C  | -3.155786000 | 0.442617000  | 1.597674000  |
| C  | -2.808153000 | -0.710357000 | 2.323386000  |
| C  | -4.166286000 | 1.278314000  | 2.105686000  |
| C  | -3.459648000 | -1.025860000 | 3.519387000  |
| H  | -2.018020000 | -1.360898000 | 1.942818000  |
| C  | -4.812721000 | 0.966318000  | 3.306707000  |
| H  | -4.452559000 | 2.182278000  | 1.564758000  |
| C  | -4.462560000 | -0.186700000 | 4.016498000  |
| H  | -3.177299000 | -1.928980000 | 4.066652000  |
| H  | -5.594023000 | 1.629244000  | 3.687966000  |
| H  | -4.967757000 | -0.428895000 | 4.955164000  |
| C  | -2.628979000 | 2.596657000  | -0.230423000 |
| C  | -3.605132000 | 3.078428000  | -1.118156000 |
| C  | -1.885525000 | 3.527415000  | 0.517206000  |
| C  | -3.835106000 | 4.453979000  | -1.248034000 |
| H  | -4.195880000 | 2.381704000  | -1.715518000 |
| C  | -2.125842000 | 4.897500000  | 0.401565000  |
| H  | -1.100502000 | 3.173309000  | 1.189654000  |
| C  | -3.101872000 | 5.366900000  | -0.485619000 |
| H  | -4.596130000 | 4.809680000  | -1.947880000 |
| H  | -1.539583000 | 5.602741000  | 0.996277000  |
| H  | -3.284136000 | 6.440034000  | -0.585541000 |
| Pt | -0.015937000 | 0.030473000  | -0.021015000 |
| P  | 0.434297000  | -2.286961000 | -0.037348000 |
| C  | 1.007602000  | -2.955153000 | -1.673480000 |
| C  | 0.786054000  | -4.282324000 | -2.082920000 |

|   |              |              |              |
|---|--------------|--------------|--------------|
| C | 1.696840000  | -2.088914000 | -2.540229000 |
| C | 1.247432000  | -4.731154000 | -3.324904000 |
| H | 0.247571000  | -4.973875000 | -1.431908000 |
| C | 2.162665000  | -2.539737000 | -3.779101000 |
| H | 1.863768000  | -1.052956000 | -2.237285000 |
| C | 1.937856000  | -3.862003000 | -4.175928000 |
| H | 1.064902000  | -5.765606000 | -3.627892000 |
| H | 2.698692000  | -1.851707000 | -4.437970000 |
| H | 2.295817000  | -4.213445000 | -5.147168000 |
| C | -0.924079000 | -3.487210000 | 0.395727000  |
| C | -2.100185000 | -3.460586000 | -0.377913000 |
| C | -0.857888000 | -4.376459000 | 1.481091000  |
| C | -3.168946000 | -4.309719000 | -0.086243000 |
| H | -2.183485000 | -2.763849000 | -1.215426000 |
| C | -1.937543000 | -5.217055000 | 1.783539000  |
| H | 0.040199000  | -4.422307000 | 2.099308000  |
| C | -3.093504000 | -5.190671000 | 1.000229000  |
| H | -4.069388000 | -4.276031000 | -0.704942000 |
| H | -1.866633000 | -5.899668000 | 2.634699000  |
| H | -3.933523000 | -5.849668000 | 1.234455000  |
| C | 1.774715000  | -2.811681000 | 1.140029000  |
| C | 2.700477000  | -3.831199000 | 0.863671000  |
| C | 1.863058000  | -2.136020000 | 2.370495000  |
| C | 3.690172000  | -4.165503000 | 1.795612000  |
| H | 2.656895000  | -4.369477000 | -0.085074000 |
| C | 2.840986000  | -2.480288000 | 3.307827000  |
| H | 1.164975000  | -1.322125000 | 2.585533000  |
| C | 3.761371000  | -3.494870000 | 3.020496000  |
| H | 4.407645000  | -4.956446000 | 1.561277000  |
| H | 2.891599000  | -1.945826000 | 4.259972000  |
| H | 4.534027000  | -3.758315000 | 3.747415000  |

**Complex 30** - [Pt(dvtms)(PPh<sub>3</sub>)], dvtms =  
divinyltetramethyldisiloxane

|    |           |           |           |
|----|-----------|-----------|-----------|
| Pt | -0.693555 | 0.011700  | -0.536172 |
| Si | -3.661238 | 1.551161  | 0.172107  |
| Si | -3.657747 | -1.624072 | -0.033735 |
| P  | 1.606345  | 0.017665  | 0.049072  |
| N  | -4.398324 | -0.031076 | -0.017362 |
| H  | -5.409303 | -0.041239 | 0.113233  |
| C  | -2.129846 | 1.640135  | -0.912984 |
| H  | -2.332422 | 1.609089  | -1.993937 |
| C  | -0.882584 | 2.197966  | -0.525611 |
| H  | -0.754184 | 2.615332  | 0.478925  |
| H  | -0.218636 | 2.640113  | -1.276554 |
| C  | -2.117397 | -1.573985 | -1.107760 |
| H  | -2.308730 | -1.430732 | -2.181559 |
| C  | -0.866298 | -2.151496 | -0.765078 |
| H  | -0.185893 | -2.508790 | -1.546512 |
| H  | -0.738257 | -2.656445 | 0.198489  |
| C  | -4.941776 | 2.827151  | -0.391336 |
| H  | -5.212448 | 2.678239  | -1.449756 |
| H  | -4.552538 | 3.853055  | -0.281362 |
| H  | -5.866920 | 2.756379  | 0.206608  |
| C  | -3.207263 | 1.917410  | 1.974894  |
| H  | -2.467531 | 1.193659  | 2.354212  |
| H  | -4.103751 | 1.843038  | 2.613423  |
| H  | -2.791150 | 2.931180  | 2.100203  |
| C  | -4.930367 | -2.812225 | -0.778955 |
| H  | -5.193560 | -2.516764 | -1.807978 |
| H  | -5.860419 | -2.829833 | -0.185017 |
| H  | -4.536976 | -3.842031 | -0.811201 |
| C  | -3.217694 | -2.236707 | 1.704324  |
| H  | -2.451409 | -1.600335 | 2.175700  |
| H  | -2.835727 | -3.271579 | 1.686980  |
| H  | -4.111115 | -2.221143 | 2.351493  |
| C  | 1.993008  | 0.394917  | 1.817835  |
| C  | 1.018511  | 1.031189  | 2.604330  |
| H  | 0.047819  | 1.266784  | 2.164881  |
| C  | 1.277673  | 1.346480  | 3.942300  |
| H  | 0.507836  | 1.839697  | 4.541045  |
| C  | 2.511877  | 1.022892  | 4.512820  |
| H  | 2.713225  | 1.265011  | 5.559477  |
| C  | 3.486078  | 0.379203  | 3.741525  |
| H  | 4.450630  | 0.117089  | 4.183321  |
| C  | 3.229218  | 0.065345  | 2.404076  |
| H  | 3.995325  | -0.447117 | 1.818023  |
| C  | 2.582256  | 1.246837  | -0.932753 |
| C  | 3.639203  | 2.005050  | -0.403824 |
| H  | 3.924589  | 1.898397  | 0.643928  |
| C  | 4.334441  | 2.912640  | -1.210823 |
| H  | 5.150145  | 3.500327  | -0.781255 |
| C  | 3.988877  | 3.069727  | -2.556045 |
| H  | 4.534350  | 3.778322  | -3.184376 |
| C  | 2.934716  | 2.321674  | -3.091757 |
| H  | 2.651295  | 2.443770  | -4.140368 |
| C  | 2.230919  | 1.424754  | -2.283809 |
| H  | 1.391342  | 0.860171  | -2.699374 |
| C  | 2.524785  | -1.567859 | -0.224818 |
| C  | 2.244778  | -2.659313 | 0.619092  |
| H  | 1.541099  | -2.542577 | 1.447129  |
| C  | 2.865697  | -3.893405 | 0.418029  |
| H  | 2.640054  | -4.727813 | 1.087226  |
| C  | 3.770466  | -4.063168 | -0.636787 |
| H  | 4.253951  | -5.030268 | -0.796332 |
| C  | 4.051135  | -2.987781 | -1.482767 |
| H  | 4.758083  | -3.107935 | -2.307825 |
| C  | 3.435142  | -1.746949 | -1.278336 |
| H  | 3.674122  | -0.917192 | -1.945919 |

**Complex 31** - [Pt(ICy)(dvtms)], dvtms =  
divinyltetramethyldisiloxane

|    |           |           |           |
|----|-----------|-----------|-----------|
| Pt | 0.465523  | 0.006023  | -0.410318 |
| N  | 2.948795  | 0.160118  | 1.441310  |
| C  | 2.449036  | 0.041206  | 0.180128  |
| N  | 3.550031  | -0.079360 | -0.612564 |
| C  | 4.715421  | -0.045234 | 0.140495  |
| H  | 5.703105  | -0.123362 | -0.305638 |
| C  | 4.335874  | 0.106393  | 1.437782  |
| H  | 4.926815  | 0.186976  | 2.346074  |
| C  | 2.127724  | 0.298406  | 2.635558  |
| H  | 2.777660  | 0.505669  | 3.495927  |
| H  | 1.560742  | -0.625117 | 2.824060  |
| C  | 3.503164  | -0.266258 | -2.055740 |
| H  | 4.504328  | -0.090735 | -2.474553 |
| H  | 2.791933  | 0.444423  | -2.499560 |
| C  | 0.266293  | 2.156921  | -0.594021 |
| H  | 0.358764  | 2.653098  | 0.379206  |
| H  | 0.933300  | 2.571069  | -1.359718 |
| C  | -0.973888 | 1.557381  | -0.980012 |
| H  | -1.147189 | 1.469465  | -2.063203 |
| Si | -2.527136 | 1.531459  | 0.066682  |
| O  | -3.132142 | -0.034755 | 0.174123  |
| C  | -3.896648 | 2.549868  | -0.738534 |
| H  | -4.829190 | 2.492872  | -0.152222 |
| H  | -4.115331 | 2.180052  | -1.754308 |
| H  | -3.609086 | 3.611516  | -0.819704 |
| C  | -2.195239 | 2.179992  | 1.808248  |
| H  | -3.099645 | 2.081792  | 2.431725  |
| H  | -1.912073 | 3.245907  | 1.792352  |
| H  | -1.383375 | 1.620033  | 2.299097  |
| H  | 1.415936  | 1.125558  | 2.510639  |
| H  | 3.180596  | -1.289093 | -2.306124 |
| C  | 0.345984  | -2.162314 | -0.354984 |
| H  | 0.450710  | -2.542743 | 0.668142  |
| H  | 1.036774  | -2.628167 | -1.067969 |
| C  | -0.910758 | -1.655881 | -0.808890 |
| H  | -1.078336 | -1.692053 | -1.895673 |
| Si | -2.469937 | -1.579476 | 0.227005  |
| C  | -3.797736 | -2.722553 | -0.474039 |
| H  | -4.736018 | -2.637382 | 0.099507  |
| H  | -4.021202 | -2.466323 | -1.523177 |
| H  | -3.474528 | -3.776559 | -0.444738 |
| C  | -2.116146 | -2.037799 | 2.023550  |
| H  | -3.019901 | -1.901995 | 2.641024  |
| H  | -1.802605 | -3.091518 | 2.112155  |
| H  | -1.317056 | -1.408983 | 2.448426  |



**Complex 32** - [Pt(Mes-NHC-Pr<sup>n</sup>-SO<sub>3</sub>Na)(dvtms)],  
dvtms = divinyltetramethyldisiloxane

|    |           |           |           |
|----|-----------|-----------|-----------|
| Pt | -0.842545 | 0.917069  | 0.186008  |
| N  | -0.098665 | -1.772256 | 1.441727  |
| C  | -1.083013 | -1.076372 | 0.799789  |
| N  | -2.194462 | -1.879878 | 0.919834  |
| C  | -1.895022 | -3.016814 | 1.675766  |
| H  | -2.645184 | -3.763144 | 1.922853  |
| C  | -0.577992 | -2.951813 | 1.991583  |
| H  | 0.050323  | -3.634490 | 2.559565  |
| C  | 1.301091  | -1.356117 | 1.490120  |
| H  | 1.628794  | -1.316504 | 2.541344  |
| C  | -1.084063 | 0.760770  | -1.959730 |
| H  | -0.314978 | 0.134806  | -2.427877 |
| H  | -2.106409 | 0.467723  | -2.228851 |
| C  | -0.806517 | 2.128322  | -1.633514 |
| H  | -1.675373 | 2.801735  | -1.597631 |
| Si | 0.842909  | 2.979682  | -1.906449 |
| O  | 1.318545  | 3.792886  | -0.508178 |
| C  | 0.725561  | 4.325349  | -3.227073 |
| H  | 1.695347  | 4.840535  | -3.342674 |
| H  | -0.022560 | 5.086558  | -2.947735 |
| H  | 0.439024  | 3.911535  | -4.207943 |
| C  | 2.186458  | 1.742628  | -2.376314 |
| H  | 3.169459  | 2.240569  | -2.426892 |
| H  | 1.990102  | 1.295593  | -3.364769 |
| H  | 2.252728  | 0.921395  | -1.645319 |
| H  | 1.313490  | -0.331592 | 1.094214  |
| C  | -0.658839 | 1.521620  | 2.295278  |
| H  | 0.208062  | 1.054259  | 2.774558  |
| H  | -1.598428 | 1.368467  | 2.836686  |
| C  | -0.494304 | 2.670920  | 1.476248  |
| H  | -1.375106 | 3.323123  | 1.370457  |
| Si | 1.146552  | 3.512270  | 1.140247  |
| C  | 1.206701  | 5.201260  | 1.972018  |
| H  | 2.159033  | 5.705037  | 1.737527  |
| H  | 0.385118  | 5.860337  | 1.645826  |
| H  | 1.139853  | 5.089809  | 3.068443  |
| C  | 2.606978  | 2.492630  | 1.761461  |
| H  | 3.548154  | 3.040285  | 1.591366  |
| H  | 2.527234  | 2.293810  | 2.842207  |
| H  | 2.689058  | 1.522859  | 1.244137  |
| C  | 2.226937  | -2.258724 | 0.662342  |
| H  | 2.428092  | -3.201689 | 1.196869  |
| H  | 1.734612  | -2.525228 | -0.285169 |
| C  | 3.545371  | -1.554247 | 0.355535  |
| H  | 3.397641  | -0.706932 | -0.332658 |
| H  | 4.042347  | -1.176708 | 1.262723  |
| S  | 4.758418  | -2.632749 | -0.460869 |
| O  | 4.055079  | -3.282060 | -1.595685 |
| O  | 5.253652  | -3.578767 | 0.583420  |
| O  | 5.846344  | -1.687589 | -0.912491 |
| Na | 7.892997  | -2.314901 | -0.344135 |
| C  | -3.464638 | -1.775895 | 0.233796  |
| C  | -3.786192 | -2.811238 | -0.684010 |
| C  | -4.392471 | -0.753376 | 0.517410  |
| C  | -5.068825 | -2.834175 | -1.242287 |
| C  | -5.658407 | -0.819357 | -0.091463 |
| C  | -6.030391 | -1.856957 | -0.949884 |
| H  | -5.326137 | -3.648934 | -1.925870 |
| H  | -6.383512 | -0.033930 | 0.139601  |
| C  | -4.107715 | 0.415068  | 1.426035  |
| H  | -3.274115 | 0.229967  | 2.110816  |
| H  | -3.833715 | 1.302214  | 0.829647  |
| H  | -5.002936 | 0.679872  | 2.010085  |
| C  | -2.801752 | -3.886683 | -1.088942 |
| H  | -1.802582 | -3.471107 | -1.302358 |
| H  | -2.670514 | -4.652333 | -0.309867 |
| H  | -3.157648 | -4.400385 | -1.993174 |
| C  | -7.409023 | -1.923754 | -1.560761 |
| H  | -8.135003 | -1.327560 | -0.988221 |
| H  | -7.406927 | -1.538742 | -2.595410 |
| H  | -7.775608 | -2.961112 | -1.606764 |

**Complex 33** - [Pt(IPr-4-SO<sub>3</sub>Na)(dvtms)], dvtms = divinyltetramethyldisiloxane

|    |           |           |           |
|----|-----------|-----------|-----------|
| Pt | 0.111043  | 0.896877  | -0.075593 |
| N  | -0.712999 | -2.134943 | -0.224069 |
| C  | 0.272662  | -1.182437 | -0.150925 |
| N  | 1.432702  | -1.908004 | -0.260532 |
| C  | 1.169985  | -3.267094 | -0.417852 |
| H  | 1.960702  | -4.000884 | -0.537382 |
| C  | -0.176267 | -3.410718 | -0.385652 |
| H  | -0.795752 | -4.298584 | -0.455594 |
| C  | 0.878514  | 1.177095  | 1.943271  |
| H  | 0.184636  | 0.794412  | 2.699908  |
| H  | 1.895342  | 0.783654  | 2.032842  |
| C  | 0.673156  | 2.463151  | 1.360880  |
| H  | 1.573838  | 2.948859  | 0.954069  |
| Si | -0.690882 | 3.669573  | 1.802656  |
| O  | -1.404981 | 4.260488  | 0.396583  |
| C  | 0.026452  | 5.177708  | 2.679737  |
| H  | -0.755880 | 5.929297  | 2.879307  |
| H  | 0.807827  | 5.656994  | 2.066459  |
| H  | 0.479971  | 4.895149  | 3.644538  |
| C  | -2.023942 | 2.881969  | 2.877740  |
| H  | -2.822395 | 3.612265  | 3.091832  |
| H  | -1.613241 | 2.540312  | 3.842455  |
| H  | -2.483301 | 2.015878  | 2.376099  |
| C  | -0.660306 | 1.068046  | -2.105384 |
| H  | -1.683449 | 0.686550  | -2.161517 |
| H  | 0.018967  | 0.627917  | -2.843153 |
| C  | -0.428789 | 2.383194  | -1.607626 |
| H  | 0.508096  | 2.864162  | -1.928637 |
| Si | -1.780317 | 3.575945  | -1.094946 |
| C  | -1.878921 | 5.016867  | -2.308728 |
| H  | -2.623706 | 5.762260  | -1.982932 |
| H  | -0.905616 | 5.527496  | -2.397061 |
| H  | -2.167574 | 4.665440  | -3.313395 |
| C  | -3.461080 | 2.724966  | -0.987456 |
| H  | -4.217092 | 3.429760  | -0.602242 |
| H  | -3.798050 | 2.383097  | -1.980605 |
| H  | -3.441528 | 1.850610  | -0.317477 |
| C  | -2.126537 | -1.893215 | -0.064540 |
| C  | -2.638620 | -1.755598 | 1.247751  |
| C  | -2.961250 | -1.865802 | -1.207606 |
| C  | -4.008427 | -1.494794 | 1.389558  |
| C  | -4.325924 | -1.613180 | -1.010184 |
| C  | -4.833017 | -1.407068 | 0.271192  |
| H  | -4.452502 | -1.374398 | 2.377607  |
| H  | -5.006670 | -1.588379 | -1.861387 |
| C  | 2.776046  | -1.396139 | -0.126848 |
| C  | 3.414213  | -0.819634 | -1.250222 |
| C  | 3.431608  | -1.546763 | 1.117960  |
| C  | 4.724934  | -0.350356 | -1.089035 |
| C  | 4.746164  | -1.069699 | 1.223905  |
| C  | 5.378778  | -0.476194 | 0.136001  |
| H  | 5.242425  | 0.114647  | -1.928995 |
| H  | 5.292846  | -1.153884 | 2.162974  |
| C  | -2.446109 | -2.173662 | -2.613181 |
| H  | -1.364052 | -1.971651 | -2.620549 |
| C  | -2.651554 | -3.664968 | -2.953495 |
| H  | -3.725188 | -3.914040 | -2.970852 |
| H  | -2.235377 | -3.890914 | -3.948407 |
| H  | -2.166740 | -4.332517 | -2.227265 |
| C  | -3.088312 | -1.308133 | -3.710289 |
| H  | -3.030935 | -0.234952 | -3.480142 |
| H  | -2.572763 | -1.478802 | -4.667991 |
| H  | -4.148948 | -1.564550 | -3.864786 |
| C  | 2.756833  | -0.771811 | -2.624954 |
| H  | 1.675457  | -0.895817 | -2.477850 |
| C  | 2.966321  | 0.566467  | -3.352118 |
| H  | 2.374901  | 0.585623  | -4.280655 |
| H  | 2.650275  | 1.417845  | -2.729605 |
| H  | 4.019119  | 0.723053  | -3.637739 |
| C  | 3.243162  | -1.951189 | -3.492119 |
| H  | 2.732288  | -1.948328 | -4.468708 |
| H  | 4.328277  | -1.884533 | -3.677687 |

|    |           |           |           |
|----|-----------|-----------|-----------|
| H  | 3.043957  | -2.920177 | -3.008203 |
| C  | -1.773440 | -1.980345 | 2.486290  |
| H  | -0.737252 | -1.730634 | 2.218059  |
| C  | -1.805119 | -3.467733 | 2.894718  |
| H  | -1.142071 | -3.641322 | 3.757587  |
| H  | -2.824581 | -3.771910 | 3.183584  |
| H  | -1.475389 | -4.126995 | 2.078321  |
| C  | -2.157713 | -1.094582 | 3.678989  |
| H  | -1.415222 | -1.212130 | 4.484076  |
| H  | -2.193938 | -0.031233 | 3.403368  |
| H  | -3.137553 | -1.370575 | 4.099983  |
| C  | 2.796382  | -2.253285 | 2.315186  |
| H  | 1.710899  | -2.291880 | 2.144252  |
| C  | 3.306377  | -3.704883 | 2.423391  |
| H  | 4.393566  | -3.724172 | 2.604336  |
| H  | 2.814871  | -4.221948 | 3.263113  |
| H  | 3.110068  | -4.284176 | 1.509429  |
| C  | 3.020606  | -1.519105 | 3.647778  |
| H  | 2.684186  | -0.473235 | 3.602077  |
| H  | 2.456050  | -2.022139 | 4.448736  |
| H  | 4.080716  | -1.523779 | 3.946929  |
| S  | -6.569530 | -0.965139 | 0.490552  |
| S  | 7.094222  | 0.062879  | 0.305333  |
| O  | -7.329981 | -1.735385 | -0.551758 |
| O  | -6.917297 | -1.306710 | 1.887156  |
| O  | 7.376057  | 0.114019  | 1.755987  |
| O  | 7.912370  | -0.954456 | -0.443493 |
| O  | 7.189374  | 1.387417  | -0.397790 |
| O  | -6.655071 | 0.506044  | 0.181396  |
| Na | -8.107441 | 0.237480  | -1.641853 |
| Na | 8.763345  | 0.590572  | -1.985073 |

**Complex 34** - [Pt(IXy-4-SO<sub>3</sub>Na)(dvtms)], dvtms =  
divinyltetramethyldisiloxane

|    |           |           |           |
|----|-----------|-----------|-----------|
| Pt | 0.190075  | 0.599371  | -0.114847 |
| N  | -0.679486 | -2.384824 | 0.288447  |
| C  | 0.326484  | -1.462995 | 0.169012  |
| N  | 1.466712  | -2.222711 | 0.222417  |
| C  | 1.172456  | -3.578195 | 0.365002  |
| H  | 1.948138  | -4.336832 | 0.415057  |
| C  | -0.177384 | -3.679984 | 0.410748  |
| H  | -0.826548 | -4.544383 | 0.515966  |
| C  | 1.199322  | 1.182073  | 1.723253  |
| H  | 0.604336  | 0.931589  | 2.609522  |
| H  | 2.225470  | 0.802540  | 1.757443  |
| C  | 0.909771  | 2.363606  | 0.975981  |
| H  | 1.747501  | 2.780244  | 0.395727  |
| Si | -0.427445 | 3.604823  | 1.396692  |
| O  | -1.312534 | 3.981791  | 0.013533  |
| C  | 0.335683  | 5.232503  | 1.969781  |
| H  | -0.441806 | 5.992655  | 2.155134  |
| H  | 1.026998  | 5.633515  | 1.209488  |
| H  | 0.905089  | 5.094537  | 2.904462  |
| C  | -1.604377 | 2.947895  | 2.716699  |
| H  | -2.392316 | 3.690093  | 2.929077  |
| H  | -1.076397 | 2.739365  | 3.662310  |
| H  | -2.096441 | 2.017865  | 2.388859  |
| C  | -0.831038 | 0.434267  | -2.032599 |
| H  | -1.850090 | 0.058397  | -1.895768 |
| H  | -0.244907 | -0.133366 | -2.763862 |
| C  | -0.550254 | 1.812226  | -1.796293 |
| H  | 0.332626  | 2.221046  | -2.311324 |
| Si | -1.839659 | 3.083028  | -1.310811 |
| C  | -2.089165 | 4.328686  | -2.705877 |
| H  | -2.807997 | 5.113654  | -2.416364 |
| H  | -1.137956 | 4.821102  | -2.969751 |
| H  | -2.475507 | 3.832366  | -3.612179 |
| C  | -3.483390 | 2.263314  | -0.881222 |
| H  | -4.199108 | 3.013690  | -0.505729 |
| H  | -3.934161 | 1.783827  | -1.766416 |
| H  | -3.362998 | 1.491588  | -0.104110 |
| C  | -2.091310 | -2.108875 | 0.288782  |
| C  | -2.695674 | -1.658889 | 1.483989  |
| C  | -2.838715 | -2.370901 | -0.876696 |
| C  | -4.077674 | -1.436058 | 1.479414  |
| C  | -4.222160 | -2.136298 | -0.837844 |
| C  | -4.827910 | -1.666158 | 0.324022  |
| H  | -4.579273 | -1.106367 | 2.391143  |
| H  | -4.830781 | -2.340408 | -1.721007 |
| C  | 2.818749  | -1.730398 | 0.182426  |
| C  | 3.395788  | -1.396110 | -1.059897 |
| C  | 3.537136  | -1.648346 | 1.393306  |
| C  | 4.716809  | -0.927575 | -1.065826 |
| C  | 4.857793  | -1.180982 | 1.343195  |
| C  | 5.434271  | -0.819399 | 0.126095  |
| H  | 5.181431  | -0.642252 | -2.011957 |
| H  | 5.441447  | -1.085136 | 2.260046  |
| S  | -6.598252 | -1.311195 | 0.346173  |
| S  | 7.148141  | -0.251490 | 0.099634  |
| O  | -7.210434 | -2.152035 | -0.739467 |
| O  | -7.066223 | -1.631630 | 1.713284  |
| O  | 7.467643  | 0.168932  | 1.482328  |
| O  | 7.964214  | -1.417402 | -0.390227 |
| O  | 7.201380  | 0.854186  | -0.917812 |
| O  | -6.728731 | 0.144390  | -0.016194 |
| Na | -8.002263 | -0.256221 | -1.947395 |
| Na | 8.812909  | -0.266657 | -2.266574 |
| C  | 2.630172  | -1.518554 | -2.352478 |
| H  | 2.039437  | -2.446461 | -2.391468 |
| H  | 1.920990  | -0.681848 | -2.464600 |
| H  | 3.314831  | -1.504582 | -3.212246 |
| C  | 2.914507  | -2.024965 | 2.715146  |
| H  | 2.084972  | -1.343099 | 2.970634  |
| H  | 2.496473  | -3.045459 | 2.697761  |
| H  | 3.660599  | -1.977224 | 3.522855  |
| C  | -1.899695 | -1.428386 | 2.742829  |

|   |           |           |           |
|---|-----------|-----------|-----------|
| H | -1.448916 | -0.422004 | 2.742346  |
| H | -2.546139 | -1.510397 | 3.628726  |
| H | -1.075147 | -2.148889 | 2.844271  |
| C | -2.226105 | -2.894117 | -2.154076 |
| H | -2.699643 | -3.844175 | -2.444681 |
| H | -2.396559 | -2.186287 | -2.980046 |
| H | -1.147019 | -3.062514 | -2.073672 |

**Complex 35** - *anti*-[Pt(IMes-4-SO<sub>3</sub>Na)(dvtms)],  
dvtms = divinyltetramethyldisiloxane

|    |           |           |           |
|----|-----------|-----------|-----------|
| Pt | 0.176721  | 0.665245  | -0.410596 |
| N  | -0.758470 | -2.083533 | 0.763526  |
| C  | 0.233098  | -1.335668 | 0.184562  |
| N  | 1.271292  | -2.221479 | 0.058546  |
| C  | 0.931452  | -3.483024 | 0.542502  |
| H  | 1.629253  | -4.314720 | 0.527534  |
| C  | -0.345571 | -3.395032 | 0.990956  |
| H  | -0.997549 | -4.135539 | 1.443882  |
| C  | 1.749129  | 1.359593  | 0.929396  |
| H  | 1.445057  | 1.290939  | 1.980316  |
| H  | 2.705440  | 0.874378  | 0.714121  |
| C  | 1.322176  | 2.461529  | 0.130190  |
| H  | 1.962718  | 2.701132  | -0.732521 |
| O  | 0.294746  | 3.904518  | 0.739148  |
| O  | -1.001392 | 4.177735  | -0.300991 |
| C  | 1.314643  | 5.491182  | 0.703675  |
| H  | 0.711399  | 6.361227  | 1.013988  |
| H  | 1.695694  | 5.689682  | -0.312183 |
| H  | 2.181249  | 5.419257  | 1.381795  |
| C  | -0.365304 | 3.608263  | 2.480941  |
| H  | -1.013247 | 4.445992  | 2.790002  |
| H  | 0.455837  | 3.531725  | 3.213130  |
| H  | -0.957812 | 2.680901  | 2.539089  |
| C  | -1.377508 | 0.396845  | -1.918522 |
| H  | -2.328168 | 0.114776  | -1.456345 |
| H  | -1.062808 | -0.277962 | -2.723093 |
| C  | -0.973269 | 1.763773  | -1.928876 |
| H  | -0.273459 | 2.056683  | -2.726663 |
| Si | -1.989553 | 3.167197  | -1.217624 |
| C  | -2.689362 | 4.252717  | -2.592349 |
| H  | -3.243174 | 5.110652  | -2.174495 |
| H  | -1.887591 | 4.649634  | -3.235872 |
| H  | -3.382603 | 3.679518  | -3.229687 |
| C  | -3.397716 | 2.531193  | -0.138353 |
| H  | -3.938314 | 3.379614  | 0.314327  |
| H  | -4.125846 | 1.941085  | -0.719094 |
| H  | -3.028636 | 1.890044  | 0.677907  |
| C  | -2.078852 | -1.624307 | 1.108602  |
| C  | -2.244148 | -0.959979 | 2.334638  |
| C  | -3.159445 | -1.907009 | 0.239347  |
| C  | -3.532434 | -0.532524 | 2.664008  |
| C  | -4.450187 | -1.475246 | 0.635799  |
| C  | -4.642468 | -0.753992 | 1.841198  |
| H  | -3.682132 | -0.000970 | 3.607014  |
| C  | 2.563276  | -1.932843 | -0.508352 |
| C  | 2.694970  | -2.017475 | -1.904406 |
| C  | 3.648370  | -1.626413 | 0.344955  |
| C  | 3.948036  | -1.733492 | -2.450558 |
| C  | 4.900161  | -1.349920 | -0.262028 |
| C  | 5.056481  | -1.383450 | -1.669793 |
| C  | 1.537326  | -2.394832 | -2.791993 |
| H  | 1.027749  | -3.302250 | -2.432347 |
| H  | 0.782385  | -1.592915 | -2.812797 |
| H  | 1.876657  | -2.573673 | -3.821793 |
| C  | 3.422402  | -1.614969 | 1.841588  |
| H  | 3.703961  | -0.649773 | 2.281155  |
| H  | 2.374328  | -1.818678 | 2.085453  |
| H  | 4.055182  | -2.364245 | 2.335512  |
| C  | -1.089923 | -0.697799 | 3.265196  |
| H  | -0.479887 | 0.144199  | 2.899108  |
| H  | -1.451681 | -0.445499 | 4.271927  |
| H  | -0.417182 | -1.566539 | 3.342231  |
| C  | -2.873735 | -2.647201 | -1.049370 |
| H  | -3.243800 | -3.681767 | -0.998161 |
| H  | -3.388063 | -2.186594 | -1.898283 |
| H  | -1.799280 | -2.671059 | -1.254156 |
| C  | 6.350095  | -1.067373 | -2.382470 |
| H  | 6.696398  | -0.054782 | -2.127415 |
| H  | 7.149092  | -1.753829 | -2.071644 |
| H  | 6.213836  | -1.131737 | -3.470682 |
| C  | -5.971103 | -0.201927 | 2.302671  |
| H  | -6.397786 | 0.474553  | 1.548081  |

|    |           |           |           |
|----|-----------|-----------|-----------|
| H  | -6.704144 | -1.004859 | 2.456947  |
| H  | -5.845914 | 0.355395  | 3.240586  |
| S  | -5.919576 | -1.744038 | -0.423028 |
| O  | -5.582709 | -2.697014 | -1.503752 |
| O  | -7.009295 | -2.262974 | 0.473630  |
| O  | -6.299293 | -0.377465 | -0.935885 |
| Na | -8.596347 | -0.676929 | -0.400802 |
| H  | 4.069834  | -1.783651 | -3.536535 |
| S  | 6.369639  | -0.864199 | 0.720003  |
| O  | 6.066010  | -0.986925 | 2.166091  |
| O  | 7.486424  | -1.757652 | 0.288357  |
| O  | 6.634892  | 0.568515  | 0.322384  |
| Na | 8.853137  | 0.840194  | 0.723627  |

**Complex 36** - *syn*-[Pt(SIMes-4-SO<sub>3</sub>Na)(dvtms)],  
dvtms = divinyltetramethyldisiloxane

|    |           |           |           |
|----|-----------|-----------|-----------|
| Pt | 0.362241  | 0.615073  | 0.312022  |
| N  | -0.932612 | -2.000767 | 1.368203  |
| C  | 0.199049  | -1.315113 | 1.084622  |
| N  | 1.243678  | -2.142930 | 1.334580  |
| C  | 0.829132  | -3.512034 | 1.701797  |
| H  | 1.059929  | -4.208504 | 0.877542  |
| C  | -0.678188 | -3.345082 | 1.926850  |
| H  | -0.954882 | -3.369498 | 2.994171  |
| C  | 1.419891  | 1.499377  | 1.997064  |
| H  | 0.781953  | 1.578493  | 2.885251  |
| H  | 2.372532  | 0.992607  | 2.180397  |
| C  | 1.332164  | 2.478215  | 0.960654  |
| H  | 2.234536  | 2.591977  | 0.339878  |
| Si | 0.239936  | 3.999696  | 0.986179  |
| O  | -0.644905 | 4.105275  | -0.444588 |
| C  | 1.302855  | 5.558903  | 1.042937  |
| H  | 0.681468  | 6.469066  | 0.990914  |
| H  | 2.010592  | 5.583017  | 0.196487  |
| H  | 1.891200  | 5.602943  | 1.975208  |
| C  | -0.953166 | 3.988436  | 2.449746  |
| H  | -1.616305 | 4.869115  | 2.409598  |
| H  | -0.408242 | 4.023153  | 3.407553  |
| H  | -1.588483 | 3.087513  | 2.452896  |
| C  | -0.628187 | 0.131014  | -1.577239 |
| H  | -1.684170 | -0.100566 | -1.410318 |
| H  | -0.082723 | -0.643206 | -2.127788 |
| C  | -0.202851 | 1.488702  | -1.635367 |
| H  | 0.729410  | 1.683807  | -2.187625 |
| Si | -1.351690 | 2.959780  | -1.459196 |
| C  | -1.591459 | 3.827878  | -3.117779 |
| H  | -2.220070 | 4.728012  | -3.008424 |
| H  | -0.624650 | 4.140496  | -3.547225 |
| H  | -2.083502 | 3.158566  | -3.843780 |
| C  | -3.029762 | 2.457365  | -0.761408 |
| H  | -3.658206 | 3.350661  | -0.603082 |
| H  | -3.572595 | 1.782021  | -1.443490 |
| H  | -2.926670 | 1.937159  | 0.204375  |
| C  | -2.273607 | -1.508637 | 1.255506  |
| C  | -2.789162 | -0.710448 | 2.290343  |
| C  | -3.058357 | -1.879551 | 0.132519  |
| C  | -4.100403 | -0.242967 | 2.161294  |
| C  | -4.380847 | -1.378303 | 0.049298  |
| C  | -4.909468 | -0.535637 | 1.058547  |
| H  | -4.509711 | 0.388906  | 2.953680  |
| C  | 2.624257  | -1.811017 | 1.141179  |
| C  | 3.181534  | -1.799387 | -0.160742 |
| C  | 3.391337  | -1.507987 | 2.281630  |
| C  | 4.520031  | -1.354570 | -0.304927 |
| C  | 4.716165  | -1.113803 | 2.090332  |
| C  | 5.295707  | -0.987236 | 0.822608  |
| H  | 5.318263  | -0.855498 | 2.965890  |
| C  | 2.335030  | -2.285207 | -1.315865 |
| H  | 1.356875  | -2.630451 | -0.966547 |
| H  | 2.175404  | -1.499782 | -2.065260 |
| H  | 2.839630  | -3.104879 | -1.842982 |
| C  | 2.807334  | -1.557029 | 3.670723  |
| H  | 1.948037  | -0.874683 | 3.765109  |
| H  | 2.443477  | -2.564217 | 3.929580  |
| H  | 3.557717  | -1.273329 | 4.422496  |
| C  | -1.972824 | -0.329505 | 3.497651  |
| H  | -1.370673 | 0.570503  | 3.289134  |
| H  | -2.625113 | -0.105846 | 4.354714  |
| H  | -1.269200 | -1.120949 | 3.792345  |
| C  | -2.437624 | -2.783123 | -0.910039 |
| H  | -2.940345 | -3.760618 | -0.931869 |
| H  | -2.544682 | -2.369543 | -1.918502 |
| H  | -1.373079 | -2.933291 | -0.706254 |
| C  | 6.704251  | -0.447960 | 0.751089  |
| H  | 7.053323  | -0.161659 | 1.754245  |
| H  | 7.397391  | -1.185485 | 0.323384  |
| H  | 6.743799  | 0.440574  | 0.103452  |
| C  | -6.287347 | 0.082485  | 1.019686  |

|    |           |           |           |
|----|-----------|-----------|-----------|
| H  | -6.394436 | 0.737131  | 0.142146  |
| H  | -7.067899 | -0.684303 | 0.942293  |
| H  | -6.460302 | 0.685084  | 1.921415  |
| S  | 5.268567  | -1.091809 | -1.954404 |
| S  | -5.441890 | -1.697940 | -1.409166 |
| O  | -4.807678 | -2.720094 | -2.270681 |
| O  | -6.780095 | -2.146285 | -0.884300 |
| O  | 6.644643  | -1.695123 | -1.919630 |
| O  | 4.409637  | -1.699977 | -2.993343 |
| O  | 5.383701  | 0.405760  | -2.092952 |
| O  | -5.595868 | -0.361669 | -2.089816 |
| Na | -7.968305 | -0.557240 | -2.227260 |
| Na | 7.617046  | 0.329992  | -2.849691 |
| H  | 1.358013  | -3.865020 | 2.598204  |
| H  | -1.276668 | -4.106040 | 1.405646  |

**Complex 37** - [Pt(Mes-NHC-Prn-SO<sub>3</sub>Na)(AE)], AE  
= diallyl ether

|    |           |           |           |
|----|-----------|-----------|-----------|
| Pt | 0.838142  | 1.139372  | -0.125140 |
| N  | -0.479081 | -1.349103 | -1.421621 |
| C  | 0.605063  | -0.817434 | -0.787471 |
| N  | 1.498119  | -1.854041 | -0.731111 |
| C  | 0.974222  | -3.003065 | -1.320101 |
| H  | 1.536797  | -3.930335 | -1.380691 |
| C  | -0.272169 | -2.682878 | -1.752354 |
| H  | -1.020915 | -3.279119 | -2.266911 |
| C  | -1.745024 | -0.651410 | -1.630410 |
| H  | -2.130954 | -0.928559 | -2.623706 |
| C  | 0.076919  | 0.991984  | 1.924010  |
| H  | -0.999038 | 0.779771  | 1.926766  |
| H  | 0.669322  | 0.339227  | 2.571915  |
| C  | 0.534303  | 2.315731  | 1.666847  |
| H  | 1.497615  | 2.614655  | 2.101158  |
| O  | 0.159028  | 4.481049  | 0.562900  |
| H  | -1.522852 | 0.424524  | -1.637491 |
| C  | 1.412484  | 2.078066  | -2.020136 |
| H  | 0.575835  | 2.062272  | -2.728563 |
| H  | 2.358825  | 1.711514  | -2.428409 |
| C  | 1.435981  | 3.040631  | -0.971716 |
| H  | 2.417104  | 3.341752  | -0.580644 |
| C  | -2.766099 | -0.984114 | -0.538364 |
| H  | -2.953580 | -2.069709 | -0.521465 |
| H  | -2.347852 | -0.711520 | 0.442456  |
| C  | -4.089845 | -0.254778 | -0.735303 |
| H  | -3.968912 | 0.839283  | -0.712215 |
| H  | -4.583754 | -0.529616 | -1.679634 |
| S  | -5.273410 | -0.635996 | 0.584842  |
| O  | -4.632049 | -0.229827 | 1.857413  |
| O  | -5.550404 | -2.114694 | 0.481698  |
| O  | -6.523526 | 0.131652  | 0.247480  |
| Na | -7.822524 | -1.814875 | -0.038841 |
| C  | 2.796139  | -1.801723 | -0.111578 |
| C  | 2.911672  | -2.139873 | 1.252062  |
| C  | 3.918306  | -1.465643 | -0.889826 |
| C  | 4.183927  | -2.091927 | 1.834958  |
| C  | 5.171123  | -1.433451 | -0.258536 |
| C  | 5.325583  | -1.736856 | 1.100209  |
| H  | 4.286131  | -2.344935 | 2.894434  |
| H  | 6.050421  | -1.166144 | -0.851434 |
| C  | 3.789467  | -1.168338 | -2.362821 |
| H  | 3.410068  | -2.043492 | -2.916549 |
| H  | 3.080529  | -0.346430 | -2.545906 |
| H  | 4.761608  | -0.891495 | -2.794248 |
| C  | 1.709306  | -2.570476 | 2.054983  |
| H  | 0.878962  | -1.856297 | 1.954341  |
| H  | 1.332260  | -3.548853 | 1.712163  |
| H  | 1.961617  | -2.663701 | 3.120494  |
| C  | 6.682789  | -1.708833 | 1.760471  |
| H  | 7.450971  | -1.294445 | 1.091535  |
| H  | 6.667056  | -1.103950 | 2.681489  |
| H  | 7.002148  | -2.724068 | 2.051501  |
| C  | 0.367224  | 4.094880  | -0.788281 |
| C  | -0.392877 | 3.482126  | 1.409136  |
| H  | -0.585054 | 3.755589  | -1.245712 |
| H  | 0.664463  | 5.027227  | -1.301062 |
| H  | -1.357453 | 3.116669  | 1.000939  |
| H  | -0.612746 | 4.009605  | 2.354683  |

**Complex 38** - [Pt(IXy-4,4-SO<sub>3</sub>Na)(AE)], AE = diallyl ether

|    |           |           |           |
|----|-----------|-----------|-----------|
| Pt | -0.022270 | 1.075943  | -0.019027 |
| N  | 0.952716  | -1.859623 | -0.453117 |
| C  | -0.085902 | -0.982077 | -0.287951 |
| N  | -1.197817 | -1.779059 | -0.379570 |
| C  | -0.856319 | -3.112050 | -0.603374 |
| H  | -1.603905 | -3.893949 | -0.700524 |
| C  | 0.496875  | -3.162814 | -0.652382 |
| H  | 1.176049  | -3.996495 | -0.806242 |
| C  | -0.969608 | 1.715180  | -1.894704 |
| H  | -0.333994 | 1.478604  | -2.755790 |
| H  | -2.007267 | 1.382370  | -1.989134 |
| C  | -0.674953 | 2.848245  | -1.086545 |
| H  | -1.511163 | 3.320073  | -0.553433 |
| O  | 1.000159  | 4.400994  | -0.177446 |
| C  | 1.158160  | 1.236151  | 1.819635  |
| H  | 2.191185  | 0.916625  | 1.640227  |
| H  | 0.685339  | 0.779666  | 2.694679  |
| C  | 0.735314  | 2.528477  | 1.398316  |
| H  | -0.092305 | 2.997672  | 1.947001  |
| C  | 2.351547  | -1.537343 | -0.362900 |
| C  | 3.019623  | -1.044783 | -1.501839 |
| C  | 3.019673  | -1.794590 | 0.852443  |
| C  | 4.391330  | -0.778486 | -1.393845 |
| C  | 4.393075  | -1.520283 | 0.916379  |
| C  | 5.064492  | -1.009800 | -0.193645 |
| H  | 4.944960  | -0.409734 | -2.260192 |
| H  | 4.944509  | -1.723560 | 1.836434  |
| C  | -2.560694 | -1.333754 | -0.276919 |
| C  | -3.110634 | -1.099881 | 0.999842  |
| C  | -3.313767 | -1.194115 | -1.460455 |
| C  | -4.451330 | -0.695599 | 1.074650  |
| C  | -4.652244 | -0.790679 | -1.343161 |
| C  | -5.209527 | -0.548057 | -0.088254 |
| H  | -4.900265 | -0.491414 | 2.048243  |
| H  | -5.263106 | -0.653431 | -2.237196 |
| S  | 6.820820  | -0.606608 | -0.081664 |
| S  | -6.954758 | -0.096368 | 0.023073  |
| O  | 7.383232  | -1.479151 | 1.003897  |
| O  | 7.387023  | -0.849934 | -1.425399 |
| O  | -7.318375 | 0.481862  | -1.287880 |
| O  | -7.687977 | -1.367308 | 0.354799  |
| O  | -7.065687 | 0.855168  | 1.180109  |
| O  | 6.885609  | 0.833089  | 0.354304  |
| Na | 8.106344  | 0.380983  | 2.304935  |
| Na | -8.548391 | -0.538546 | 2.381210  |
| C  | -2.290814 | -1.271949 | 2.254263  |
| H  | -1.825564 | -2.269343 | 2.298241  |
| H  | -1.472073 | -0.534903 | 2.292574  |
| H  | -2.915840 | -1.142435 | 3.149458  |
| C  | -2.711738 | -1.469775 | -2.814962 |
| H  | -1.732656 | -0.975932 | -2.922747 |
| H  | -2.542355 | -2.547805 | -2.968639 |
| H  | -3.371990 | -1.117125 | -3.616496 |
| C  | 2.293327  | -0.815000 | -2.802899 |
| H  | 1.612766  | 0.045952  | -2.724186 |
| H  | 3.004129  | -0.620869 | -3.619416 |
| H  | 1.677806  | -1.687307 | -3.079909 |
| C  | 2.296992  | -2.327246 | 2.065846  |
| H  | 3.015998  | -2.692672 | 2.811384  |
| H  | 1.693181  | -1.534799 | 2.537091  |
| H  | 1.609770  | -3.149171 | 1.817738  |
| C  | 0.477269  | 3.790463  | -1.349095 |
| C  | 1.655044  | 3.527807  | 0.732348  |
| H  | 0.141369  | 4.635935  | -1.976888 |
| H  | 1.282087  | 3.267493  | -1.905914 |
| H  | 2.096143  | 4.198134  | 1.491822  |
| H  | 2.492433  | 3.000460  | 0.230765  |

**Complex 39** - [Pt(PPh<sub>3</sub>)<sub>2</sub>(MeOPhHC=CHCOOPhOMe)]

|    |           |           |           |
|----|-----------|-----------|-----------|
| Pt | 0.238084  | -0.166467 | 0.013030  |
| P  | 2.193827  | 0.380911  | -1.193366 |
| P  | -0.770751 | 1.732320  | 1.029329  |
| O  | -2.315048 | -2.002037 | -1.555802 |
| O  | -3.360009 | -1.790355 | 0.445974  |
| O  | -8.460545 | -1.831329 | -1.733432 |
| O  | 4.246355  | -5.060331 | 2.822193  |
| C  | 3.688761  | 0.683196  | -0.142644 |
| C  | 3.870719  | -0.140475 | 0.984402  |
| C  | 4.971845  | 0.039263  | 1.825145  |
| C  | 5.899831  | 1.053787  | 1.562640  |
| C  | 5.721120  | 1.883169  | 0.451683  |
| C  | 4.624242  | 1.699212  | -0.398300 |
| C  | 2.193978  | 1.802705  | -2.388080 |
| C  | 3.032122  | 1.820799  | -3.519169 |
| C  | 3.019656  | 2.908880  | -4.395967 |
| C  | 2.166694  | 3.993513  | -4.161241 |
| C  | 1.329673  | 3.985085  | -3.041631 |
| C  | 1.345082  | 2.897827  | -2.162481 |
| C  | 2.727853  | -1.001286 | -2.311096 |
| C  | 4.018679  | -1.550466 | -2.301207 |
| C  | 4.354206  | -2.591550 | -3.176180 |
| C  | 3.407196  | -3.091345 | -4.072893 |
| C  | 2.116108  | -2.548717 | -4.089298 |
| C  | 1.777359  | -1.517170 | -3.211807 |
| C  | 0.244565  | 3.263380  | 1.293075  |
| C  | 1.586624  | 3.097060  | 1.678639  |
| C  | 2.403683  | 4.205692  | 1.914617  |
| C  | 1.895808  | 5.499084  | 1.751617  |
| C  | 0.566208  | 5.675370  | 1.357430  |
| C  | -0.256939 | 4.566102  | 1.134085  |
| C  | -2.275903 | 2.357156  | 0.151183  |
| C  | -2.338763 | 2.212519  | -1.246126 |
| C  | -3.436254 | 2.700375  | -1.962517 |
| C  | -4.491415 | 3.325574  | -1.290285 |
| C  | -4.445825 | 3.459617  | 0.101872  |
| C  | -3.345506 | 2.980468  | 0.818742  |
| C  | -1.396858 | 1.389926  | 2.743670  |
| C  | -2.362730 | 0.380260  | 2.911968  |
| C  | -2.847869 | 0.065530  | 4.182732  |
| C  | -2.369837 | 0.743887  | 5.309853  |
| C  | -1.407419 | 1.744821  | 5.154319  |
| C  | -0.927621 | 2.070647  | 3.879452  |
| C  | -1.013957 | -1.883658 | 0.472155  |
| C  | 0.216556  | -2.337586 | -0.125020 |
| C  | -2.235752 | -1.894814 | -0.353876 |
| C  | -4.619875 | -1.821302 | -0.140114 |
| C  | -5.436615 | -2.923836 | 0.095098  |
| C  | -6.737906 | -2.965243 | -0.421189 |
| C  | -7.218216 | -1.891257 | -1.184721 |
| C  | -6.384317 | -0.781587 | -1.414967 |
| C  | -5.094540 | -0.743370 | -0.895993 |
| C  | -9.341077 | -2.920343 | -1.561471 |
| C  | 1.269996  | -3.039006 | 0.647045  |
| C  | 1.415237  | -2.913253 | 2.048056  |
| C  | 2.408300  | -3.595797 | 2.741182  |
| C  | 3.307105  | -4.437255 | 2.059892  |
| C  | 3.183163  | -4.578291 | 0.670602  |
| C  | 2.175847  | -3.886770 | -0.012329 |
| C  | 5.177911  | -5.916138 | 2.198399  |
| H  | 3.144609  | -0.926363 | 1.207116  |
| H  | 5.098985  | -0.613417 | 2.692683  |
| H  | 6.757803  | 1.198941  | 2.224303  |
| H  | 6.438557  | 2.681262  | 0.241294  |
| H  | 4.500107  | 2.357567  | -1.259903 |
| H  | 3.699661  | 0.979619  | -3.720493 |
| H  | 3.679484  | 2.906993  | -5.268804 |
| H  | 2.152964  | 4.840302  | -4.852220 |
| H  | 0.655300  | 4.824705  | -2.849730 |
| H  | 0.691136  | 2.900391  | -1.290118 |
| H  | 4.772231  | -1.169114 | -1.609853 |
| H  | 5.363913  | -3.010060 | -3.153860 |
| H  | 3.670426  | -3.902946 | -4.756148 |

|   |            |           |           |
|---|------------|-----------|-----------|
| H | 1.366130   | -2.935615 | -4.784076 |
| H | 0.760676   | -1.114763 | -3.221489 |
| H | 1.997843   | 2.090250  | 1.784067  |
| H | 3.443712   | 4.055119  | 2.214985  |
| H | 2.536582   | 6.367204  | 1.926242  |
| H | 0.162560   | 6.682680  | 1.222569  |
| H | -1.293543  | 4.723795  | 0.830599  |
| H | -1.529208  | 1.700206  | -1.772290 |
| H | -3.470041  | 2.579015  | -3.048601 |
| H | -5.352748  | 3.700704  | -1.848846 |
| H | -5.271979  | 3.938302  | 0.634632  |
| H | -3.324284  | 3.089285  | 1.905785  |
| H | -2.741616  | -0.165792 | 2.048270  |
| H | -3.601106  | -0.718518 | 4.291240  |
| H | -2.745157  | 0.492348  | 6.305534  |
| H | -1.027041  | 2.284842  | 6.028333  |
| H | -0.183372  | 2.862223  | 3.779867  |
| H | -1.194797  | -2.030941 | 1.539512  |
| H | 0.150562   | -2.645118 | -1.173409 |
| H | -5.051601  | -3.754359 | 0.689861  |
| H | -7.359661  | -3.838107 | -0.222628 |
| H | -6.774185  | 0.046845  | -2.009567 |
| H | -4.453247  | 0.120943  | -1.072605 |
| H | -8.933703  | -3.850231 | -1.997321 |
| H | -10.269779 | -2.658996 | -2.086447 |
| H | -9.572120  | -3.099691 | -0.495921 |
| H | 0.742935   | -2.256586 | 2.604388  |
| H | 2.511754   | -3.493904 | 3.823886  |
| H | 3.858385   | -5.223060 | 0.107753  |
| H | 2.093454   | -4.013358 | -1.094703 |
| H | 4.683635   | -6.767992 | 1.697127  |
| H | 5.831423   | -6.302221 | 2.992297  |
| H | 5.796032   | -5.380341 | 1.455708  |



**Complex 40 - [Pt(PPh<sub>3</sub>)<sub>2</sub>(PhHC=CHCOOPhMe)]**

|    |           |           |           |   |           |           |           |
|----|-----------|-----------|-----------|---|-----------|-----------|-----------|
| Pt | 0.223719  | -0.419875 | 0.376121  | H | -3.549884 | 2.616959  | 5.519682  |
| P  | -0.651990 | 1.774125  | 0.598507  | H | -4.148924 | 0.742233  | 3.976388  |
| P  | 2.151346  | -0.377202 | -0.991442 | H | -2.887461 | 0.395535  | 1.888560  |
| O  | -3.445525 | -1.637299 | 0.900954  | H | -0.568863 | 4.547786  | -0.631745 |
| O  | -2.211161 | -2.595285 | -0.739072 | H | 1.144103  | 6.333180  | -0.560490 |
| C  | -1.134823 | -1.852881 | 1.286577  | H | 3.266538  | 5.991797  | 0.706922  |
| C  | 0.120689  | -2.500246 | 1.000402  | H | 3.663094  | 3.829083  | 1.895698  |
| C  | 1.099786  | -2.862802 | 2.052305  | H | 1.961961  | 2.025706  | 1.795160  |
| C  | 1.106009  | -2.273590 | 3.335261  | H | -3.081092 | 3.568882  | 0.560212  |
| C  | 2.052019  | -2.643256 | 4.293540  | H | -4.692407 | 4.138358  | -1.233838 |
| C  | 3.022168  | -3.608990 | 3.999563  | H | -4.440207 | 3.146478  | -3.509941 |
| C  | 3.029276  | -4.204466 | 2.733729  | H | -2.557772 | 1.572309  | -3.973777 |
| C  | 2.080439  | -3.838168 | 1.776893  | H | -0.951491 | 0.987577  | -2.171253 |
| C  | -2.256624 | -2.085289 | 0.358004  | H | 4.568873  | -2.073055 | -1.668111 |
| C  | -4.616324 | -1.756417 | 0.162050  | H | 4.799852  | -4.257133 | -2.799826 |
| C  | -5.283957 | -2.982062 | 0.089511  | H | 2.779203  | -5.473867 | -3.616217 |
| C  | -6.497122 | -3.063192 | -0.594238 | H | 0.511687  | -4.480822 | -3.258573 |
| C  | -7.067300 | -1.935661 | -1.211674 | H | 0.269774  | -2.320227 | -2.082689 |
| C  | -6.374022 | -0.719533 | -1.123608 | H | 1.584988  | -0.705918 | -3.923166 |
| C  | -5.154469 | -0.622982 | -0.445587 | H | 1.464546  | 0.891976  | -5.796208 |
| C  | -8.386082 | -2.041001 | -1.939814 | H | 1.977264  | 3.310128  | -5.429424 |
| C  | -1.561374 | 2.091099  | 2.189390  | H | 2.604246  | 4.100322  | -3.141143 |
| C  | -1.236316 | 3.144931  | 3.060173  | H | 2.701760  | 2.513924  | -1.258760 |
| C  | -1.946211 | 3.329179  | 4.252822  | H | 4.838463  | 0.687290  | -1.901923 |
| C  | -2.995440 | 2.471093  | 4.588981  | H | 6.969094  | 1.042735  | -0.694826 |
| C  | -3.330075 | 1.421766  | 3.725386  | H | 7.138895  | 0.514507  | 1.738550  |
| C  | -2.616676 | 1.228091  | 2.540319  | H | 5.146527  | -0.380894 | 2.952639  |
| C  | 0.569713  | 3.164840  | 0.589721  | H | 3.005128  | -0.724691 | 1.748300  |
| C  | 0.354606  | 4.382560  | -0.073785 |   |           |           |           |
| C  | 1.323098  | 5.392274  | -0.033238 |   |           |           |           |
| C  | 2.512152  | 5.201504  | 0.676562  |   |           |           |           |
| C  | 2.733841  | 3.990996  | 1.343861  |   |           |           |           |
| C  | 1.772472  | 2.978676  | 1.294388  |   |           |           |           |
| C  | -1.893414 | 2.248542  | -0.687118 |   |           |           |           |
| C  | -2.957275 | 3.132004  | -0.433066 |   |           |           |           |
| C  | -3.867759 | 3.452452  | -1.445037 |   |           |           |           |
| C  | -3.725747 | 2.897038  | -2.721205 |   |           |           |           |
| C  | -2.671236 | 2.016519  | -2.981888 |   |           |           |           |
| C  | -1.763813 | 1.689890  | -1.970289 |   |           |           |           |
| C  | 2.404323  | -2.022503 | -1.814807 |   |           |           |           |
| C  | 3.673253  | -2.589923 | -2.015640 |   |           |           |           |
| C  | 3.804865  | -3.826528 | -2.657064 |   |           |           |           |
| C  | 2.673630  | -4.508518 | -3.113967 |   |           |           |           |
| C  | 1.405149  | -3.952504 | -2.916456 |   |           |           |           |
| C  | 1.269451  | -2.724144 | -2.262971 |   |           |           |           |
| C  | 2.150588  | 0.780639  | -2.444513 |   |           |           |           |
| C  | 1.802651  | 0.346829  | -3.735695 |   |           |           |           |
| C  | 1.736696  | 1.252406  | -4.800364 |   |           |           |           |
| C  | 2.023913  | 2.604195  | -4.596220 |   |           |           |           |
| C  | 2.374180  | 3.046115  | -3.316182 |   |           |           |           |
| C  | 2.430081  | 2.146203  | -2.249248 |   |           |           |           |
| C  | 3.769360  | -0.045466 | -0.160049 |   |           |           |           |
| C  | 4.897050  | 0.451948  | -0.837423 |   |           |           |           |
| C  | 6.101061  | 0.653474  | -0.155915 |   |           |           |           |
| C  | 6.196438  | 0.356442  | 1.207749  |   |           |           |           |
| C  | 5.081725  | -0.142707 | 1.888206  |   |           |           |           |
| C  | 3.874512  | -0.338731 | 1.210413  |   |           |           |           |
| H  | -1.428563 | -1.621502 | 2.312855  |   |           |           |           |
| H  | 0.129327  | -3.168737 | 0.135018  |   |           |           |           |
| H  | 0.365602  | -1.509613 | 3.582958  |   |           |           |           |
| H  | 2.031029  | -2.171713 | 5.280151  |   |           |           |           |
| H  | 3.762379  | -3.896093 | 4.751033  |   |           |           |           |
| H  | 3.778562  | -4.962847 | 2.489653  |   |           |           |           |
| H  | 2.093363  | -4.312436 | 0.791941  |   |           |           |           |
| H  | -4.850884 | -3.862040 | 0.569854  |   |           |           |           |
| H  | -7.015024 | -4.025971 | -0.649178 |   |           |           |           |
| H  | -6.790685 | 0.174915  | -1.595603 |   |           |           |           |
| H  | -4.618873 | 0.326816  | -0.387164 |   |           |           |           |
| H  | -8.343210 | -2.797196 | -2.741455 |   |           |           |           |
| H  | -8.672086 | -1.081994 | -2.396891 |   |           |           |           |
| H  | -9.198609 | -2.343482 | -1.257420 |   |           |           |           |
| H  | -0.426434 | 3.833620  | 2.815388  |   |           |           |           |
| H  | -1.675544 | 4.154316  | 4.917728  |   |           |           |           |

**Complex 41** - [Pt(PPh<sub>3</sub>)<sub>2</sub>(NO<sub>2</sub>PhHC=CHCOOPhNO<sub>2</sub>)]

|    |           |           |           |   |           |           |           |
|----|-----------|-----------|-----------|---|-----------|-----------|-----------|
| Pt | 0.325538  | 0.102510  | -0.089597 | H | 3.188299  | -4.517448 | 2.143051  |
| P  | -0.740291 | -1.701832 | 1.042298  | H | 2.076657  | -6.694464 | 1.621448  |
| P  | 2.301980  | -0.632797 | -1.153478 | H | -0.289447 | -6.710542 | 0.827673  |
| O  | 4.553912  | 5.282210  | 3.285455  | H | -1.536662 | -4.594701 | 0.577415  |
| O  | 5.188757  | 5.981138  | 1.339341  | H | 4.966404  | 0.809504  | -1.291320 |
| O  | -2.292409 | 1.857791  | -1.747399 | H | 5.835765  | 2.531585  | -2.841072 |
| O  | -3.257139 | 1.655074  | 0.300240  | H | 4.414566  | 3.373597  | -4.713120 |
| O  | -8.958054 | 3.015299  | -1.960318 | H | 2.098207  | 2.480979  | -5.005566 |
| O  | -9.402274 | 1.238650  | -0.809357 | H | 1.214185  | 0.774796  | -3.443119 |
| N  | 4.457247  | 5.318928  | 2.064707  | H | 3.981237  | -1.512531 | -3.466245 |
| N  | -8.629112 | 2.081609  | -1.242424 | H | 3.845367  | -3.443583 | -5.002453 |
| C  | -1.162745 | -1.274084 | 2.800316  | H | 1.997734  | -5.107779 | -4.771953 |
| C  | -2.036881 | -0.194017 | 3.030005  | H | 0.284343  | -4.812481 | -2.977123 |
| C  | -2.370648 | 0.186086  | 4.331434  | H | 0.425748  | -2.880754 | -1.433754 |
| C  | -1.830755 | -0.496668 | 5.427496  | H | 4.518819  | -2.710587 | -1.072275 |
| C  | -0.964120 | -1.569111 | 5.209528  | H | 6.317764  | -3.131159 | 0.571259  |
| C  | -0.634714 | -1.959715 | 3.905932  | H | 6.527438  | -1.700730 | 2.606355  |
| C  | -2.382471 | -2.141637 | 0.316885  | H | 4.908622  | 0.164863  | 2.978871  |
| C  | -3.396252 | -2.749994 | 1.079425  | H | 3.092152  | 0.580914  | 1.342953  |
| C  | -4.610599 | -3.106000 | 0.486198  | H | 0.206338  | 2.448035  | -1.512889 |
| C  | -4.828481 | -2.857509 | -0.874018 | H | -1.063847 | 2.090637  | 1.287299  |
| C  | -3.830037 | -2.246110 | -1.637218 | H | -4.237372 | 3.540345  | -1.356533 |
| C  | -2.614535 | -1.886717 | -1.045171 | H | -6.654918 | 3.720888  | -1.989176 |
| C  | 0.114051  | -3.337032 | 1.214115  | H | -7.545635 | 0.194302  | 0.305087  |
| C  | 1.452498  | -3.338798 | 1.646298  | H | -5.114594 | -0.000913 | 0.943597  |
| C  | 2.150687  | -4.538569 | 1.801482  | H | 0.845636  | 2.456350  | 2.271394  |
| C  | 1.528373  | -5.756088 | 1.508259  | H | 2.640917  | 3.814496  | 3.322940  |
| C  | 0.203844  | -5.764440 | 1.064281  | H | 3.972459  | 5.111295  | -0.557017 |
| C  | -0.502180 | -4.564827 | 0.922195  | H | 2.172771  | 3.761572  | -1.632324 |
| C  | 3.031819  | 0.663196  | -2.260074 |   |           |           |           |
| C  | 4.329859  | 1.170805  | -2.101403 |   |           |           |           |
| C  | 4.822498  | 2.144395  | -2.980137 |   |           |           |           |
| C  | 4.027135  | 2.616508  | -4.026455 |   |           |           |           |
| C  | 2.728490  | 2.116001  | -4.190177 |   |           |           |           |
| C  | 2.232667  | 1.151922  | -3.310899 |   |           |           |           |
| C  | 2.218829  | -2.068278 | -2.322841 |   |           |           |           |
| C  | 3.174426  | -2.238399 | -3.342969 |   |           |           |           |
| C  | 3.096322  | -3.327175 | -4.214722 |   |           |           |           |
| C  | 2.060149  | -4.259057 | -4.086047 |   |           |           |           |
| C  | 1.101719  | -4.094222 | -3.082519 |   |           |           |           |
| C  | 1.180210  | -3.004765 | -2.209238 |   |           |           |           |
| C  | 3.683682  | -1.025444 | 0.011151  |   |           |           |           |
| C  | 4.598067  | -2.071691 | -0.190353 |   |           |           |           |
| C  | 5.614904  | -2.311800 | 0.740864  |   |           |           |           |
| C  | 5.732490  | -1.510313 | 1.880442  |   |           |           |           |
| C  | 4.825730  | -0.465426 | 2.089188  |   |           |           |           |
| C  | 3.805427  | -0.227738 | 1.164618  |   |           |           |           |
| C  | 0.300411  | 2.238597  | -0.442880 |   |           |           |           |
| C  | -0.917412 | 1.844911  | 0.233207  |   |           |           |           |
| C  | 1.365812  | 3.006154  | 0.231017  |   |           |           |           |
| C  | 1.519643  | 3.037364  | 1.638507  |   |           |           |           |
| C  | 2.523331  | 3.787108  | 2.240179  |   |           |           |           |
| C  | 3.398777  | 4.526502  | 1.435502  |   |           |           |           |
| C  | 3.279008  | 4.522012  | 0.042993  |   |           |           |           |
| C  | 2.270135  | 3.766601  | -0.545030 |   |           |           |           |
| C  | -2.160032 | 1.794842  | -0.549279 |   |           |           |           |
| C  | -4.544561 | 1.759290  | -0.161279 |   |           |           |           |
| C  | -4.959023 | 2.809867  | -0.994143 |   |           |           |           |
| C  | -6.300782 | 2.912761  | -1.350189 |   |           |           |           |
| C  | -7.210354 | 1.965923  | -0.871904 |   |           |           |           |
| C  | -6.807872 | 0.914770  | -0.045542 |   |           |           |           |
| C  | -5.465356 | 0.812256  | 0.306960  |   |           |           |           |
| H  | -2.469622 | 0.349744  | 2.188510  |   |           |           |           |
| H  | -3.055844 | 1.022869  | 4.488984  |   |           |           |           |
| H  | -2.088863 | -0.195241 | 6.445525  |   |           |           |           |
| H  | -0.541152 | -2.115133 | 6.056636  |   |           |           |           |
| H  | 0.035340  | -2.807712 | 3.762111  |   |           |           |           |
| H  | -3.237697 | -2.948840 | 2.141785  |   |           |           |           |
| H  | -5.389673 | -3.580392 | 1.088616  |   |           |           |           |
| H  | -5.779519 | -3.134093 | -1.336117 |   |           |           |           |
| H  | -3.998045 | -2.036205 | -2.696300 |   |           |           |           |
| H  | -1.843901 | -1.391911 | -1.641730 |   |           |           |           |
| H  | 1.956363  | -2.394461 | 1.861191  |   |           |           |           |

**Complex 42 - [Pt(PPh<sub>3</sub>)<sub>2</sub>(NO<sub>2</sub>PhHC=CHCOOPh)]**

|    |           |           |           |
|----|-----------|-----------|-----------|
| Pt | -0.019478 | -0.202288 | -0.146918 |
| P  | 1.727052  | 1.123758  | -1.039493 |
| P  | -1.573669 | 1.106846  | 1.084743  |
| O  | 6.170026  | -4.532397 | 1.381841  |
| O  | 5.168406  | -4.302192 | 3.285256  |
| O  | -3.065567 | -2.697330 | -0.301769 |
| O  | -1.915791 | -2.325992 | -2.221787 |
| N  | 5.201517  | -4.217757 | 2.062648  |
| C  | 2.982074  | 1.702430  | 0.188918  |
| C  | 3.574655  | 2.974738  | 0.147835  |
| C  | 4.514375  | 3.349446  | 1.114981  |
| C  | 4.877316  | 2.459455  | 2.129303  |
| C  | 4.291444  | 1.189183  | 2.178000  |
| C  | 3.345215  | 0.816380  | 1.220267  |
| C  | 1.310120  | 2.633729  | -2.032359 |
| C  | 0.127014  | 3.339367  | -1.764748 |
| C  | -0.202812 | 4.484754  | -2.494977 |
| C  | 0.644677  | 4.939353  | -3.508411 |
| C  | 1.825430  | 4.242765  | -3.786903 |
| C  | 2.155676  | 3.098012  | -3.057140 |
| C  | 2.738858  | 0.170806  | -2.268096 |
| C  | 2.059914  | -0.429469 | -3.345101 |
| C  | 2.759575  | -1.156067 | -4.309881 |
| C  | 4.148979  | -1.305595 | -4.207592 |
| C  | 4.829429  | -0.719478 | -3.138269 |
| C  | 4.130249  | 0.017708  | -2.173988 |
| C  | -1.122574 | 2.832041  | 1.596318  |
| C  | 0.178149  | 3.052258  | 2.083661  |
| C  | 0.578660  | 4.325777  | 2.497097  |
| C  | -0.309155 | 5.403011  | 2.412323  |
| C  | -1.599264 | 5.197451  | 1.916749  |
| C  | -2.007291 | 3.919990  | 1.516135  |
| C  | -3.207391 | 1.307069  | 0.246384  |
| C  | -3.254053 | 1.256538  | -1.156744 |
| C  | -4.463090 | 1.446331  | -1.833584 |
| C  | -5.639254 | 1.679278  | -1.115782 |
| C  | -5.605666 | 1.717179  | 0.282941  |
| C  | -4.397697 | 1.531995  | 0.961427  |
| C  | -2.018318 | 0.312805  | 2.703519  |
| C  | -2.648749 | -0.945982 | 2.678556  |
| C  | -2.972683 | -1.601059 | 3.868495  |
| C  | -2.663053 | -1.018995 | 5.103095  |
| C  | -2.036133 | 0.228186  | 5.137056  |
| C  | -1.719523 | 0.893755  | 3.946646  |
| C  | -0.774320 | -2.230260 | -0.101016 |
| C  | 0.553060  | -2.230209 | -0.670342 |
| C  | 1.732046  | -2.729705 | 0.060797  |
| C  | 2.888502  | -3.107410 | -0.659830 |
| C  | 4.022102  | -3.591623 | -0.016982 |
| C  | 4.013864  | -3.709380 | 1.376248  |
| C  | 2.887964  | -3.349592 | 2.126321  |
| C  | 1.763365  | -2.864625 | 1.470491  |
| C  | -1.920430 | -2.404574 | -1.015928 |
| C  | -4.244819 | -3.011456 | -0.962192 |
| C  | -4.324298 | -4.117231 | -1.814122 |
| C  | -5.552475 | -4.444826 | -2.393254 |
| C  | -6.692924 | -3.680943 | -2.120742 |
| C  | -6.599108 | -2.578854 | -1.265605 |
| C  | -5.373771 | -2.236869 | -0.686106 |
| H  | 3.302742  | 3.683032  | -0.636147 |
| H  | 4.964490  | 4.344899  | 1.072066  |
| H  | 5.612722  | 2.753889  | 2.882071  |
| H  | 4.567280  | 0.486158  | 2.967853  |
| H  | 2.881311  | -0.171817 | 1.276004  |
| H  | -0.540845 | 2.991576  | -0.978625 |
| H  | -1.129526 | 5.018497  | -2.271138 |
| H  | 0.385234  | 5.831278  | -4.083502 |
| H  | 2.492407  | 4.588435  | -4.580441 |
| H  | 3.076729  | 2.561839  | -3.292852 |
| H  | 0.973600  | -0.333619 | -3.425648 |
| H  | 2.218033  | -1.612998 | -5.142231 |
| H  | 4.696567  | -1.879291 | -4.959773 |
| H  | 5.912759  | -0.832503 | -3.048372 |

|   |           |           |           |
|---|-----------|-----------|-----------|
| H | 4.679182  | 0.472280  | -1.347483 |
| H | 0.887488  | 2.223607  | 2.135116  |
| H | 1.592858  | 4.475253  | 2.874746  |
| H | 0.006362  | 6.402077  | 2.726263  |
| H | -2.297971 | 6.034504  | 1.840747  |
| H | -3.020183 | 3.779938  | 1.136324  |
| H | -2.340058 | 1.051298  | -1.719796 |
| H | -4.485098 | 1.398220  | -2.925036 |
| H | -6.585316 | 1.822080  | -1.644598 |
| H | -6.524535 | 1.891409  | 0.849554  |
| H | -4.383247 | 1.561462  | 2.053090  |
| H | -2.892553 | -1.419203 | 1.725552  |
| H | -3.466381 | -2.575581 | 3.828774  |
| H | -2.910921 | -1.536255 | 6.033493  |
| H | -1.793322 | 0.695396  | 6.094996  |
| H | -1.239098 | 1.871465  | 3.997424  |
| H | -0.942473 | -2.622429 | 0.904052  |
| H | 0.612333  | -2.346166 | -1.756318 |
| H | 2.888588  | -3.017115 | -1.747668 |
| H | 4.911332  | -3.884021 | -0.574117 |
| H | 2.912458  | -3.456714 | 3.210558  |
| H | 0.893532  | -2.575500 | 2.062012  |
| H | -3.433164 | -4.711074 | -2.018578 |
| H | -5.618170 | -5.307733 | -3.059883 |
| H | -7.651556 | -3.945393 | -2.574393 |
| H | -7.484021 | -1.975831 | -1.048194 |
| H | -5.281374 | -1.373877 | -0.025174 |

**Complex 43 - [Pt(PPh<sub>3</sub>)<sub>2</sub>(MePhHC=CHCOOPh)]**

|    |           |           |           |
|----|-----------|-----------|-----------|
| Pt | 0.112961  | -0.371751 | 0.039879  |
| P  | 2.118848  | 0.511486  | -0.838622 |
| P  | -1.295809 | 1.351156  | 0.869196  |
| O  | -3.304170 | -2.419078 | -0.138014 |
| O  | -2.009556 | -2.184804 | -1.987562 |
| C  | 2.872814  | -0.637789 | -2.081423 |
| C  | 2.035602  | -1.175430 | -3.076346 |
| C  | 2.549169  | -2.038280 | -4.046918 |
| C  | 3.904250  | -2.390045 | -4.028951 |
| C  | 4.740470  | -1.869008 | -3.038384 |
| C  | 4.229939  | -0.994478 | -2.071695 |
| C  | 2.107618  | 2.120637  | -1.767807 |
| C  | 1.482282  | 3.236350  | -1.184351 |
| C  | 1.463386  | 4.470211  | -1.837713 |
| C  | 2.061422  | 4.609154  | -3.094540 |
| C  | 2.682939  | 3.506985  | -3.687171 |
| C  | 2.709156  | 2.272563  | -3.029150 |
| C  | 3.472951  | 0.754440  | 0.402490  |
| C  | 3.552807  | -0.147163 | 1.479257  |
| C  | 4.560462  | -0.017057 | 2.438754  |
| C  | 5.494013  | 1.020684  | 2.343362  |
| C  | 5.417518  | 1.925595  | 1.280247  |
| C  | 4.415011  | 1.793138  | 0.313260  |
| C  | -0.662025 | 2.445969  | 2.228301  |
| C  | 0.717362  | 2.502617  | 2.483329  |
| C  | 1.223019  | 3.312094  | 3.506812  |
| C  | 0.354589  | 4.069371  | 4.295761  |
| C  | -1.024150 | 4.007184  | 4.063553  |
| C  | -1.529525 | 3.198241  | 3.042857  |
| C  | -1.915024 | 2.490857  | -0.451829 |
| C  | -2.241944 | 3.840741  | -0.244203 |
| C  | -2.707563 | 4.627970  | -1.303800 |
| C  | -2.856580 | 4.076771  | -2.580522 |
| C  | -2.531589 | 2.733891  | -2.796890 |
| C  | -2.057687 | 1.947905  | -1.742161 |
| C  | -2.855276 | 0.721960  | 1.652033  |
| C  | -2.727226 | -0.127902 | 2.766090  |
| C  | -3.857480 | -0.641291 | 3.402219  |
| C  | -5.136278 | -0.323591 | 2.928209  |
| C  | -5.272870 | 0.511320  | 1.818036  |
| C  | -4.139326 | 1.034845  | 1.183226  |
| C  | -4.493115 | -2.482424 | -0.840768 |
| C  | -4.878495 | -1.498121 | -1.757667 |
| C  | -6.128501 | -1.593803 | -2.375026 |
| C  | -6.991333 | -2.655277 | -2.081672 |
| C  | -6.596613 | -3.630758 | -1.160562 |
| C  | -5.346791 | -3.548383 | -0.540976 |
| C  | -2.095465 | -2.258430 | -0.781465 |
| C  | -0.996313 | -2.228297 | 0.200890  |
| C  | 0.343185  | -2.510409 | -0.254479 |
| C  | 1.358974  | -3.177325 | 0.595174  |
| C  | 1.277536  | -3.234339 | 2.001461  |
| C  | 2.254783  | -3.882320 | 2.758996  |
| C  | 3.361704  | -4.501518 | 2.155470  |
| C  | 3.443674  | -4.448806 | 0.754440  |
| C  | 2.467785  | -3.805460 | -0.007120 |
| C  | 4.431595  | -5.179486 | 2.976709  |
| H  | 0.971225  | -0.925889 | -3.084621 |
| H  | 1.885451  | -2.445434 | -4.813980 |
| H  | 4.304652  | -3.072574 | -4.783255 |
| H  | 5.798854  | -2.142361 | -3.013532 |
| H  | 4.897065  | -0.592573 | -1.307237 |
| H  | 1.003489  | 3.143914  | -0.209071 |
| H  | 0.964717  | 5.322617  | -1.367300 |
| H  | 2.039766  | 5.572505  | -3.610590 |
| H  | 3.154158  | 3.603133  | -4.669167 |
| H  | 3.204693  | 1.425983  | -3.507197 |
| H  | 2.821682  | -0.954687 | 1.566871  |
| H  | 4.610119  | -0.728628 | 3.266730  |
| H  | 6.278050  | 1.126035  | 3.098156  |
| H  | 6.141985  | 2.740563  | 1.199609  |
| H  | 4.368346  | 2.505185  | -0.512959 |
| H  | 1.401294  | 1.894855  | 1.889737  |

|   |           |           |           |
|---|-----------|-----------|-----------|
| H | 2.300481  | 3.338585  | 3.689253  |
| H | 0.748060  | 4.699019  | 5.097928  |
| H | -1.711595 | 4.585629  | 4.686030  |
| H | -2.609964 | 3.142043  | 2.890733  |
| H | -2.128663 | 4.289981  | 0.743726  |
| H | -2.954628 | 5.678133  | -1.127999 |
| H | -3.220516 | 4.694542  | -3.406435 |
| H | -2.635316 | 2.296644  | -3.793273 |
| H | -1.779947 | 0.905272  | -1.920614 |
| H | -1.732735 | -0.390669 | 3.136559  |
| H | -3.741420 | -1.298246 | 4.267985  |
| H | -6.022110 | -0.731279 | 3.421731  |
| H | -6.266370 | 0.760270  | 1.437350  |
| H | -4.264887 | 1.687908  | 0.317919  |
| H | -4.208853 | -0.668273 | -1.980957 |
| H | -6.430037 | -0.825144 | -3.092129 |
| H | -7.967534 | -2.720441 | -2.568327 |
| H | -7.262899 | -4.463977 | -0.922542 |
| H | -5.018986 | -4.299404 | 0.181138  |
| H | -1.303215 | -2.486067 | 1.216896  |
| H | 0.446360  | -2.726176 | -1.322461 |
| H | 0.437316  | -2.762224 | 2.515102  |
| H | 2.152349  | -3.911325 | 3.848152  |
| H | 4.287005  | -4.926900 | 0.246583  |
| H | 2.560121  | -3.788723 | -1.096038 |
| H | 4.792986  | -6.099174 | 2.489766  |
| H | 5.309286  | -4.523160 | 3.114138  |
| H | 4.064396  | -5.447278 | 3.978986  |

**Complex 44 - [Pt(PPh<sub>3</sub>)<sub>2</sub>(PhHC=CHCOOPh)]**

|    |           |           |           |
|----|-----------|-----------|-----------|
| Pt | 0.077955  | -0.472318 | 0.303582  |
| P  | 2.073379  | -0.203300 | -0.930179 |
| P  | -0.959966 | 1.642110  | 0.614992  |
| O  | -2.045655 | -2.795018 | -1.093081 |
| O  | -3.503246 | -2.068570 | 0.480484  |
| C  | -3.092909 | 0.791647  | 2.236976  |
| C  | -3.946483 | 0.813327  | 3.341883  |
| C  | -3.773934 | 1.769592  | 4.349219  |
| C  | -2.744701 | 2.707102  | 4.238327  |
| C  | -1.893833 | 2.694833  | 3.126290  |
| C  | -2.057415 | 1.736282  | 2.112649  |
| C  | -3.185885 | 3.042671  | -0.523794 |
| C  | -4.004414 | 3.431234  | -1.588134 |
| C  | -3.733304 | 2.981197  | -2.884550 |
| C  | -2.642466 | 2.136588  | -3.112876 |
| C  | -1.825176 | 1.742554  | -2.048925 |
| C  | -2.084216 | 2.197388  | -0.744654 |
| C  | -0.035146 | 4.355562  | 0.358521  |
| C  | 0.870746  | 5.391535  | 0.614436  |
| C  | 1.994716  | 5.164258  | 1.414444  |
| C  | 2.213173  | 3.892777  | 1.957114  |
| C  | 1.315097  | 2.855228  | 1.693681  |
| C  | 0.178923  | 3.075844  | 0.894441  |
| C  | 2.050488  | 2.389441  | -2.046624 |
| C  | 1.967635  | 3.332687  | -3.072875 |
| C  | 1.861237  | 2.918605  | -4.405053 |
| C  | 1.844864  | 1.553593  | -4.700566 |
| C  | 1.938078  | 0.606158  | -3.674392 |
| C  | 2.041992  | 1.011453  | -2.333055 |
| C  | 1.520903  | -2.576223 | -2.335317 |
| C  | 1.827029  | -3.758078 | -3.016331 |
| C  | 3.157757  | -4.170311 | -3.148297 |
| C  | 4.180283  | -3.390514 | -2.600292 |
| C  | 3.877935  | -2.199842 | -1.930565 |
| C  | 2.545086  | -1.778501 | -1.791666 |
| C  | 4.672792  | 0.960169  | -0.555463 |
| C  | 5.812797  | 1.245610  | 0.202693  |
| C  | 5.899343  | 0.819454  | 1.531807  |
| C  | 4.839312  | 0.107003  | 2.101575  |
| C  | 3.695032  | -0.172298 | 1.348537  |
| C  | 3.600419  | 0.249205  | 0.010699  |
| C  | 2.115852  | -3.770844 | 1.724995  |
| C  | 3.017514  | -4.089666 | 2.741805  |
| C  | 2.862551  | -3.542714 | 4.020015  |
| C  | 1.793060  | -2.673633 | 4.265876  |
| C  | 0.893464  | -2.351808 | 3.248216  |
| C  | 1.035415  | -2.893526 | 1.952143  |
| C  | 0.109515  | -2.578187 | 0.838693  |
| C  | -1.218073 | -2.057062 | 1.046181  |
| C  | -2.231730 | -2.352329 | 0.017212  |
| C  | -4.753033 | -1.395731 | -1.485911 |
| C  | -5.901198 | -1.530709 | -2.270264 |
| C  | -6.882235 | -2.471856 | -1.938504 |
| C  | -6.711128 | -3.283799 | -0.813078 |
| C  | -5.563629 | -3.160488 | -0.023827 |
| C  | -4.592721 | -2.216978 | -0.365903 |
| H  | -3.234477 | 0.027150  | 1.471623  |
| H  | -4.746704 | 0.072489  | 3.416727  |
| H  | -4.437980 | 1.781194  | 5.217579  |
| H  | -2.599476 | 3.458567  | 5.019012  |
| H  | -1.100924 | 3.440621  | 3.056557  |
| H  | -3.412020 | 3.394362  | 0.485122  |
| H  | -4.860222 | 4.085399  | -1.402466 |
| H  | -4.376347 | 3.284256  | -3.715019 |
| H  | -2.426981 | 1.776194  | -4.121734 |
| H  | -0.983110 | 1.069589  | -2.225855 |
| H  | -0.908559 | 4.548603  | -0.267349 |
| H  | 0.694102  | 6.381480  | 0.185297  |
| H  | 2.701178  | 5.974751  | 1.612088  |
| H  | 3.092672  | 3.703220  | 2.577869  |
| H  | 1.502898  | 1.858738  | 2.101790  |
| H  | 2.126409  | 2.732512  | -1.014025 |
| H  | 1.981219  | 4.397393  | -2.826643 |

|   |           |           |           |
|---|-----------|-----------|-----------|
| H | 1.791982  | 3.657165  | -5.207804 |
| H | 1.764308  | 1.216227  | -5.737487 |
| H | 1.932026  | -0.454425 | -3.929609 |
| H | 0.474518  | -2.284470 | -2.210932 |
| H | 1.018093  | -4.363873 | -3.433075 |
| H | 3.395993  | -5.100291 | -3.671242 |
| H | 5.222772  | -3.708022 | -2.691920 |
| H | 4.689930  | -1.602770 | -1.511752 |
| H | 4.621558  | 1.296820  | -1.592625 |
| H | 6.637618  | 1.802273  | -0.249843 |
| H | 6.791702  | 1.043055  | 2.122273  |
| H | 4.897632  | -0.232686 | 3.138538  |
| H | 2.868404  | -0.724014 | 1.801949  |
| H | 2.244558  | -4.205975 | 0.730514  |
| H | 3.845751  | -4.772844 | 2.535212  |
| H | 3.565248  | -3.793557 | 4.818209  |
| H | 1.657118  | -2.241714 | 5.261359  |
| H | 0.072750  | -1.663597 | 3.460190  |
| H | 0.242286  | -3.207119 | -0.045198 |
| H | -1.614881 | -1.900363 | 2.051890  |
| H | -3.986998 | -0.659615 | -1.734641 |
| H | -6.029736 | -0.890162 | -3.146731 |
| H | -7.778341 | -2.571082 | -2.555768 |
| H | -7.473002 | -4.020384 | -0.546331 |
| H | -5.409674 | -3.785156 | 0.858365  |

**Complex 45 - [Pt(PPh<sub>3</sub>)<sub>2</sub>(NO<sub>2</sub>PhHC=CHCOOPhOMe)]**

|    |           |           |           |   |           |           |           |
|----|-----------|-----------|-----------|---|-----------|-----------|-----------|
| Pt | -0.205915 | 0.122933  | -0.061403 | H | 2.390214  | -0.118330 | 6.419743  |
| P  | 0.883849  | -1.660011 | 1.068738  | H | 0.828548  | -2.038393 | 6.090713  |
| P  | -2.125654 | -0.651574 | -1.208128 | H | 0.182948  | -2.746240 | 3.818028  |
| O  | -4.714675 | 5.005556  | 3.352400  | H | -3.079951 | 0.635969  | 1.189101  |
| O  | -5.403010 | 5.638249  | 1.402194  | H | -4.969018 | 0.234064  | 2.743494  |
| O  | 2.348654  | 1.981987  | -1.654047 | H | -6.514395 | -1.692985 | 2.367087  |
| O  | 3.319065  | 1.852893  | 0.392217  | H | -6.155873 | -3.199731 | 0.410204  |
| O  | 8.580600  | 2.087360  | -1.345603 | H | -4.288528 | -2.788547 | -1.157279 |
| N  | -4.617783 | 5.044196  | 2.131420  | H | -0.265509 | -2.924900 | -1.365650 |
| C  | 2.503599  | -2.126082 | 0.309615  | H | -0.068305 | -4.876826 | -2.876540 |
| C  | 2.711792  | -1.868164 | -1.055708 | H | -1.692951 | -5.178682 | -4.750032 |
| C  | 3.910435  | -2.240602 | -1.673152 | H | -3.509422 | -3.500297 | -5.091061 |
| C  | 4.916153  | -2.866803 | -0.932112 | H | -3.699034 | -1.547513 | -3.588669 |
| C  | 4.723558  | -3.115514 | 0.431797  | H | -0.894281 | 0.803519  | -3.387238 |
| C  | 3.525896  | -2.746755 | 1.050457  | H | -1.688649 | 2.499433  | -5.006653 |
| C  | 0.011357  | -3.280683 | 1.287259  | H | -4.044105 | 3.327685  | -4.905727 |
| C  | 0.612117  | -4.524602 | 1.031908  | H | -5.596159 | 2.426531  | -3.171104 |
| C  | -0.107752 | -5.711371 | 1.210879  | H | -4.814170 | 0.714412  | -1.564702 |
| C  | -1.431378 | -5.673488 | 1.656133  | H | 1.100785  | 2.122265  | 1.382725  |
| C  | -2.038668 | -4.439357 | 1.913672  | H | -0.139832 | 2.507810  | -1.424573 |
| C  | -1.326547 | -3.252819 | 1.721304  | H | -0.808791 | 2.454953  | 2.353369  |
| C  | 1.354847  | -1.220674 | 2.811436  | H | -2.702955 | 3.676421  | 3.397121  |
| C  | 2.236522  | -0.140317 | 3.006822  | H | -4.099883 | 4.885630  | -0.487375 |
| C  | 2.609638  | 0.247629  | 4.295201  | H | -2.199051 | 3.676728  | -1.554540 |
| C  | 2.101985  | -0.427008 | 5.411635  | H | 5.138469  | 0.008346  | 0.692500  |
| C  | 1.227238  | -1.499417 | 5.227280  | H | 7.526379  | 0.164130  | -0.063914 |
| C  | 0.858588  | -1.898343 | 3.936651  | H | 6.698997  | 4.032503  | -1.790769 |
| C  | -3.558577 | -1.036805 | -0.104294 | H | 4.356914  | 3.876342  | -1.024314 |
| C  | -3.761335 | -0.199140 | 1.008449  | H | 9.040202  | 4.124286  | -1.460776 |
| C  | -4.822213 | -0.429343 | 1.887564  | H | 8.593002  | 3.345792  | -3.016128 |
| C  | -5.687535 | -1.508666 | 1.676279  | H | 10.164290 | 2.967136  | -2.241243 |
| C  | -5.487010 | -2.351941 | 0.579779  |   |           |           |           |
| C  | -4.430736 | -2.118093 | -0.308028 |   |           |           |           |
| C  | -2.000448 | -2.103815 | -2.354739 |   |           |           |           |
| C  | -0.980760 | -3.050413 | -2.177029 |   |           |           |           |
| C  | -0.871265 | -4.152104 | -3.031401 |   |           |           |           |
| C  | -1.779874 | -4.320201 | -4.079063 |   |           |           |           |
| C  | -2.798108 | -3.380006 | -4.270015 |   |           |           |           |
| C  | -2.906613 | -2.278633 | -3.417654 |   |           |           |           |
| C  | -2.800930 | 0.630763  | -2.364522 |   |           |           |           |
| C  | -1.930589 | 1.149634  | -3.341271 |   |           |           |           |
| C  | -2.376135 | 2.108993  | -4.252063 |   |           |           |           |
| C  | -3.696476 | 2.573365  | -4.195285 |   |           |           |           |
| C  | -4.564708 | 2.068623  | -3.224874 |   |           |           |           |
| C  | -4.121578 | 1.100339  | -2.314528 |   |           |           |           |
| C  | 0.973322  | 1.894769  | 0.322425  |   |           |           |           |
| C  | -0.242819 | 2.272774  | -0.361062 |   |           |           |           |
| C  | -1.355323 | 2.968814  | 0.310451  |   |           |           |           |
| C  | -1.519205 | 2.986471  | 1.717586  |   |           |           |           |
| C  | -2.576857 | 3.660977  | 2.315052  |   |           |           |           |
| C  | -3.499600 | 4.336609  | 1.507472  |   |           |           |           |
| C  | -3.369659 | 4.346555  | 0.115456  |   |           |           |           |
| C  | -2.305374 | 3.668930  | -0.468216 |   |           |           |           |
| C  | 2.232396  | 1.909827  | -0.452732 |   |           |           |           |
| C  | 4.609750  | 1.935175  | -0.118638 |   |           |           |           |
| C  | 5.494764  | 0.886686  | 0.152373  |   |           |           |           |
| C  | 6.818930  | 0.970300  | -0.268558 |   |           |           |           |
| C  | 7.273380  | 2.098365  | -0.974099 |   |           |           |           |
| C  | 6.377963  | 3.144722  | -1.246547 |   |           |           |           |
| C  | 5.049514  | 3.060074  | -0.814794 |   |           |           |           |
| C  | 9.106414  | 3.192001  | -2.049661 |   |           |           |           |
| H  | 1.936300  | -1.358558 | -1.633134 |   |           |           |           |
| H  | 4.061046  | -2.027004 | -2.733961 |   |           |           |           |
| H  | 5.854977  | -3.152081 | -1.413609 |   |           |           |           |
| H  | 5.510208  | -3.597662 | 1.018036  |   |           |           |           |
| H  | 3.387853  | -2.942375 | 2.116200  |   |           |           |           |
| H  | 1.645845  | -4.576617 | 0.686948  |   |           |           |           |
| H  | 0.373763  | -6.669825 | 1.001347  |   |           |           |           |
| H  | -1.991098 | -6.601586 | 1.797000  |   |           |           |           |
| H  | -3.075717 | -4.396025 | 2.255468  |   |           |           |           |
| H  | -1.819376 | -2.295977 | 1.908089  |   |           |           |           |
| H  | 2.641965  | 0.400602  | 2.149781  |   |           |           |           |
| H  | 3.299627  | 1.085480  | 4.425779  |   |           |           |           |

**Complex 46 - [Pt(PPh<sub>3</sub>)<sub>2</sub>(NO<sub>2</sub>PhHC=CHCOOPhMe)]**

|    |           |           |           |
|----|-----------|-----------|-----------|
| Pt | 0.088909  | -0.139988 | -0.106099 |
| P  | 1.984060  | 0.869268  | -1.105108 |
| P  | -1.211233 | 1.457068  | 1.076924  |
| O  | -3.294240 | -2.195025 | 0.049282  |
| O  | -2.222105 | -2.071082 | -1.946155 |
| O  | 4.774931  | -4.899509 | 3.267843  |
| O  | 5.622857  | -5.338412 | 1.327071  |
| N  | 4.753522  | -4.856755 | 2.043098  |
| C  | -0.524502 | 3.145457  | 1.416295  |
| C  | 0.815066  | 3.238634  | 1.834385  |
| C  | 1.389963  | 4.481035  | 2.114821  |
| C  | 0.640311  | 5.651911  | 1.963366  |
| C  | -0.687718 | 5.571304  | 1.536162  |
| C  | -1.269816 | 4.326908  | 1.269179  |
| C  | -2.849164 | 1.794294  | 0.290683  |
| C  | -2.971081 | 1.637716  | -1.100260 |
| C  | -4.180203 | 1.920680  | -1.743626 |
| C  | -5.283207 | 2.355017  | -1.003191 |
| C  | -5.175842 | 2.500939  | 0.384671  |
| C  | -3.967401 | 2.222165  | 1.029491  |
| C  | -1.668067 | 0.859150  | 2.774003  |
| C  | -2.454756 | -0.303867 | 2.882264  |
| C  | -2.800358 | -0.812758 | 4.135557  |
| C  | -2.357815 | -0.178616 | 5.302669  |
| C  | -1.575641 | 0.973861  | 5.204433  |
| C  | -1.235512 | 1.493564  | 3.949825  |
| C  | 2.820289  | -0.273690 | -2.302882 |
| C  | 2.038922  | -0.813193 | -3.341502 |
| C  | 2.608341  | -1.665624 | -4.288844 |
| C  | 3.965727  | -2.001951 | -4.207174 |
| C  | 4.745942  | -1.478536 | -3.174090 |
| C  | 4.178225  | -0.616718 | -2.226477 |
| C  | 3.334854  | 1.308593  | 0.079637  |
| C  | 3.580948  | 0.416033  | 1.139186  |
| C  | 4.588299  | 0.678001  | 2.071175  |
| C  | 5.354694  | 1.844154  | 1.966444  |
| C  | 5.109413  | 2.742138  | 0.924655  |
| C  | 4.107495  | 2.477272  | -0.016736 |
| C  | 1.772033  | 2.373552  | -2.167330 |
| C  | 0.656061  | 3.204430  | -1.987750 |
| C  | 0.479381  | 4.344929  | -2.777641 |
| C  | 1.416972  | 4.668460  | -3.761716 |
| C  | 2.531061  | 3.843906  | -3.954937 |
| C  | 2.706472  | 2.703518  | -3.167466 |
| C  | 0.321991  | -2.254975 | -0.531652 |
| C  | -0.955335 | -2.020286 | 0.103292  |
| C  | 1.449621  | -2.905110 | 0.160958  |
| C  | 1.534519  | -3.006966 | 1.571049  |
| C  | 2.605497  | -3.641171 | 2.188509  |
| C  | 3.623423  | -4.188403 | 1.398144  |
| C  | 3.575832  | -4.108824 | 0.003186  |
| C  | 2.496613  | -3.473847 | -0.601061 |
| C  | -2.167388 | -2.089207 | -0.738667 |
| C  | -4.542157 | -2.404260 | -0.521402 |
| C  | -5.575453 | -1.532408 | -0.172585 |
| C  | -6.865471 | -1.762757 | -0.655517 |
| C  | -7.148663 | -2.852595 | -1.494585 |
| C  | -6.088431 | -3.707409 | -1.835168 |
| C  | -4.793591 | -3.496344 | -1.354886 |
| C  | -8.552143 | -3.105898 | -1.990764 |
| H  | 1.418156  | 2.333820  | 1.935324  |
| H  | 2.431752  | 4.531019  | 2.441043  |
| H  | 1.091976  | 6.624961  | 2.172726  |
| H  | -1.280154 | 6.481134  | 1.409411  |
| H  | -2.309031 | 4.285586  | 0.939149  |
| H  | -2.117332 | 1.276033  | -1.678769 |
| H  | -4.261215 | 1.787128  | -2.824968 |
| H  | -6.229825 | 2.570054  | -1.505338 |
| H  | -6.037561 | 2.833123  | 0.969727  |
| H  | -3.897832 | 2.336758  | 2.113551  |
| H  | -2.805293 | -0.815504 | 1.983905  |
| H  | -3.416993 | -1.713144 | 4.199377  |
| H  | -2.624041 | -0.581886 | 6.282879  |

|   |           |           |           |
|---|-----------|-----------|-----------|
| H | -1.227430 | 1.480325  | 6.108552  |
| H | -0.631444 | 2.400364  | 3.897010  |
| H | 0.974977  | -0.568887 | -3.405803 |
| H | 1.988887  | -2.073409 | -5.091695 |
| H | 4.410690  | -2.672625 | -4.946757 |
| H | 5.805187  | -1.738125 | -3.099641 |
| H | 4.802802  | -0.214263 | -1.427331 |
| H | 2.975296  | -0.488227 | 1.236699  |
| H | 4.771160  | -0.029498 | 2.883065  |
| H | 6.139168  | 2.053213  | 2.698855  |
| H | 5.701196  | 3.657342  | 0.838260  |
| H | 3.928992  | 3.190876  | -0.821907 |
| H | -0.080981 | 2.956477  | -1.225451 |
| H | -0.398142 | 4.977753  | -2.622790 |
| H | 1.278508  | 5.557694  | -4.381875 |
| H | 3.266118  | 4.086157  | -4.727029 |
| H | 3.574762  | 2.063423  | -3.339228 |
| H | 0.295851  | -2.429067 | -1.611598 |
| H | -1.118086 | -2.326947 | 1.139085  |
| H | 0.749327  | -2.575602 | 2.194066  |
| H | 2.668843  | -3.723378 | 3.273065  |
| H | 4.380007  | -4.548314 | -0.586204 |
| H | 2.453824  | -3.413520 | -1.690043 |
| H | -5.360789 | -0.677712 | 0.470919  |
| H | -7.668271 | -1.075072 | -0.374970 |
| H | -6.276142 | -4.562452 | -2.490497 |
| H | -3.984124 | -4.173245 | -1.628951 |
| H | -8.559023 | -3.789155 | -2.853119 |
| H | -9.048817 | -2.170253 | -2.293109 |
| H | -9.177953 | -3.562669 | -1.203932 |

**Complex 47 - [Pt(PPh<sub>3</sub>)<sub>2</sub>(NO<sub>2</sub>PhHC=CHCOOPr<sup>i</sup>)]**

|    |           |           |           |   |           |           |           |
|----|-----------|-----------|-----------|---|-----------|-----------|-----------|
| Pt | 0.121075  | -0.308157 | -0.331910 | H | 0.997536  | 6.351347  | -2.925910 |
| P  | 2.074123  | 0.294051  | 0.873196  | H | -1.482401 | 6.085802  | -2.819996 |
| P  | -1.278869 | 1.567251  | -0.666883 | H | -2.474195 | 4.031233  | -1.863494 |
| O  | -6.843889 | -3.153832 | 1.197512  | H | -1.731198 | 4.222789  | 0.757783  |
| O  | -5.659315 | -3.713467 | 2.918859  | H | -2.975865 | 4.788114  | 2.816959  |
| O  | 1.244496  | -2.320597 | -2.980781 | H | -4.179064 | 3.010802  | 4.092688  |
| O  | 2.386728  | -3.379508 | -1.345445 | H | -4.101008 | 0.643285  | 3.290222  |
| N  | -5.770357 | -3.304172 | 1.768793  | H | -2.824512 | 0.064787  | 1.249394  |
| C  | 2.376150  | -0.851514 | 2.304162  | H | -4.319379 | 1.798661  | -0.681712 |
| C  | 2.348282  | -0.430850 | 3.643291  | H | -5.999146 | 1.303984  | -2.427661 |
| C  | 2.543959  | -1.348916 | 4.682241  | H | -5.282295 | 0.456337  | -4.663115 |
| C  | 2.777879  | -2.696169 | 4.398538  | H | -2.851786 | 0.104996  | -5.129334 |
| C  | 2.814790  | -3.122753 | 3.065274  | H | -1.166987 | 0.574888  | -3.377407 |
| C  | 2.611485  | -2.212314 | 2.026239  | H | -1.160661 | -1.855175 | -2.212679 |
| C  | 3.637942  | 0.153534  | -0.103058 | H | 0.470717  | -3.036789 | 0.135079  |
| C  | 4.889779  | -0.029332 | 0.512122  | H | -1.187726 | -2.899626 | 1.474157  |
| C  | 6.054812  | -0.092608 | -0.257510 | H | -3.269764 | -3.478249 | 2.695585  |
| C  | 5.984658  | 0.024129  | -1.650971 | H | -5.617417 | -2.423718 | -0.750879 |
| C  | 4.744313  | 0.194730  | -2.271496 | H | -3.536290 | -1.860874 | -2.004031 |
| C  | 3.576225  | 0.254678  | -1.503025 | H | 3.527558  | -2.949486 | -3.014063 |
| C  | 2.187714  | 1.970969  | 1.653887  | H | 2.108801  | -4.906504 | -3.560351 |
| C  | 3.315759  | 2.802497  | 1.550496  | H | 2.885295  | -5.863268 | -2.261236 |
| C  | 3.325789  | 4.064661  | 2.155335  | H | 3.828803  | -5.353116 | -3.689290 |
| C  | 2.216786  | 4.508479  | 2.879901  | H | 4.618558  | -4.667643 | -0.696499 |
| C  | 1.088590  | 3.688049  | 2.987943  | H | 4.958290  | -2.933363 | -0.969495 |
| C  | 1.070022  | 2.434733  | 2.370920  | H | 5.552123  | -4.153575 | -2.126712 |
| C  | -0.561435 | 3.119768  | -1.378714 |   |           |           |           |
| C  | 0.829613  | 3.276487  | -1.450099 |   |           |           |           |
| C  | 1.390100  | 4.433037  | -2.003712 |   |           |           |           |
| C  | 0.562488  | 5.447345  | -2.492630 |   |           |           |           |
| C  | -0.828784 | 5.298546  | -2.433253 |   |           |           |           |
| C  | -1.387517 | 4.141133  | -1.886858 |   |           |           |           |
| C  | -2.207876 | 2.105783  | 0.838903  |   |           |           |           |
| C  | -2.253559 | 3.431535  | 1.299518  |   |           |           |           |
| C  | -2.955258 | 3.752090  | 2.467854  |   |           |           |           |
| C  | -3.626551 | 2.757030  | 3.184724  |   |           |           |           |
| C  | -3.581575 | 1.430830  | 2.736302  |   |           |           |           |
| C  | -2.868783 | 1.105893  | 1.579854  |   |           |           |           |
| C  | -2.620614 | 1.228067  | -1.904790 |   |           |           |           |
| C  | -3.986484 | 1.427289  | -1.652469 |   |           |           |           |
| C  | -4.938677 | 1.148113  | -2.641709 |   |           |           |           |
| C  | -4.538241 | 0.674072  | -3.892610 |   |           |           |           |
| C  | -3.175844 | 0.476564  | -4.153937 |   |           |           |           |
| C  | -2.226372 | 0.746481  | -3.166697 |   |           |           |           |
| C  | -0.990849 | -1.993448 | -1.140933 |   |           |           |           |
| C  | 0.333504  | -2.417441 | -0.753887 |   |           |           |           |
| C  | -2.197817 | -2.334368 | -0.367651 |   |           |           |           |
| C  | -2.149843 | -2.797670 | 0.970589  |   |           |           |           |
| C  | -3.307460 | -3.118051 | 1.668151  |   |           |           |           |
| C  | -4.548687 | -2.974012 | 1.036263  |   |           |           |           |
| C  | -4.638028 | -2.521212 | -0.283901 |   |           |           |           |
| C  | -3.470822 | -2.210342 | -0.971869 |   |           |           |           |
| C  | 1.330788  | -2.672590 | -1.820580 |   |           |           |           |
| C  | 3.432870  | -3.759247 | -2.274423 |   |           |           |           |
| C  | 3.036837  | -5.047879 | -2.987192 |   |           |           |           |
| C  | 4.713962  | -3.884296 | -1.465196 |   |           |           |           |
| H  | 2.176629  | 0.617991  | 3.888818  |   |           |           |           |
| H  | 2.517498  | -1.002380 | 5.718998  |   |           |           |           |
| H  | 2.933965  | -3.410911 | 5.210599  |   |           |           |           |
| H  | 3.001814  | -4.174141 | 2.830942  |   |           |           |           |
| H  | 2.643445  | -2.565526 | 0.993252  |   |           |           |           |
| H  | 4.957865  | -0.125948 | 1.598397  |   |           |           |           |
| H  | 7.021309  | -0.235391 | 0.233056  |   |           |           |           |
| H  | 6.896640  | -0.026786 | -2.251316 |   |           |           |           |
| H  | 4.679020  | 0.272734  | -3.360056 |   |           |           |           |
| H  | 2.606086  | 0.361758  | -1.994516 |   |           |           |           |
| H  | 4.194446  | 2.474637  | 0.993275  |   |           |           |           |
| H  | 4.210298  | 4.700812  | 2.059483  |   |           |           |           |
| H  | 2.228006  | 5.493158  | 3.354153  |   |           |           |           |
| H  | 0.210806  | 4.026858  | 3.544288  |   |           |           |           |
| H  | 0.173162  | 1.814430  | 2.442094  |   |           |           |           |
| H  | 1.475974  | 2.482738  | -1.074584 |   |           |           |           |
| H  | 2.476570  | 4.536432  | -2.053359 |   |           |           |           |
